# Supplementary material
Source: PubMed Central journal article supplement (PMC5879491)
Supplement: ja7b11422_si_001.pdf [file ja7b11422_si_001.pdf]

## Supporting Information

### Synthesis and characterization of a bidirectional photoswitchable antagonist toolbox for real-time GPCR photopharmacology

Niels J. Hauwert, Tamara A.M. Mocking, Daniel Da Costa Pereira, Albert J. Kooistra, Lisa M. Wijnen, Gerda C.M. Vreeker, Eléonore W.E. Verweij, Albertus H. de Boer, Martine J. Smit, Chris De Graaf, Henry F. Vischer, Iwan J.P. de Esch, Maikel Wijtmans, Rob Leurs

#### Table of contents

|                                                                                                                                        |        |
|----------------------------------------------------------------------------------------------------------------------------------------|--------|
| Thermal relaxation of key compounds (Fig. S1-S3)                                                                                       | S3,4   |
| UV-Vis spectra of key compounds during illuminations (Fig. S4-S15)                                                                     | S5-10  |
| Extended figures for 1000 isomerization cycle experiments (Fig. S16, S17)                                                              | S11    |
| Extended LC-MS chromatograms and <sup>1</sup> H-NMR spectra during illumination (Fig. S18-S21)                                         | S12-15 |
| Overview of LC-MS and <sup>1</sup> H-NMR areas during illumination (Table S1)                                                          | S16    |
| Overview of binding selectivity amongst histamine receptor family (Table S2)                                                           | S16    |
| Overview of binding modes of <b>28</b> and <b>33</b> in a H <sub>3</sub> R homology model (Fig. S22)                                   | S17    |
| Binding mode comparison of <b>33</b> in H <sub>3</sub> R and Ergotamine in 5-HT <sub>1B</sub> (Fig. S23)                               | S17    |
| Histamine response of GIRK-H <sub>3</sub> R expressing or non-injected oocytes (Fig. S24)                                              | S18    |
| Histamine response of GIRK-H <sub>3</sub> R expressing oocyte after injection of PTX (Fig. S25)                                        | S18    |
| Histamine response of GIRK-H <sub>3</sub> R expressing oocyte antagonized using clobenpropit (Fig. S26)                                | S19    |
| Time traces of <b>28</b> and <b>33</b> on non-injected or GIRK-H <sub>3</sub> R expressing oocytes (Fig S27–S30)                       | S19-21 |
| Effect of illumination on histamine response of GIRK-H <sub>3</sub> R expressing oocyte (Fig. S31)                                     | S21    |
| Dose response curve of <b>28</b> and <b>33</b> in competition with histamine on GIRK-H <sub>3</sub> R expressing oocyte (Fig S32, S33) | S21,22 |

|                                                                                                                                          |         |
|------------------------------------------------------------------------------------------------------------------------------------------|---------|
| Extended time traces of histamine in competition with <b>28</b> or <b>33</b> on GIRK-H <sub>3</sub> R expressing oocytes (Fig. S34, S35) | S22,23  |
| NOESY spectrum of compound <b>32, 33, 34, 36</b> (Fig. S36-S39)                                                                          | S24-27  |
| Chemical procedures                                                                                                                      | S28-37  |
| Chemical analyses (Fig. S40 – S108)                                                                                                      | S38-107 |
| References                                                                                                                               | S108    |

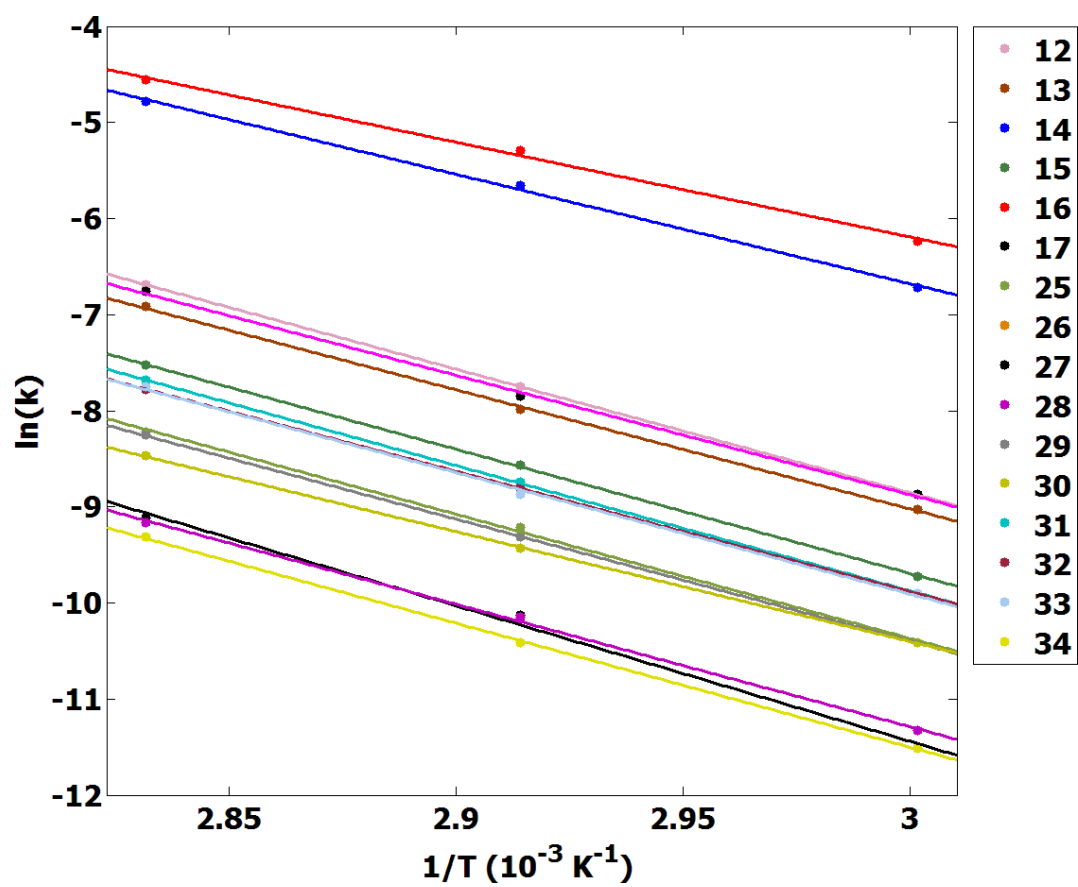

Figure S1: Arrhenius plots for all compounds measured at a compound concentration of 25  $\mu\text{M}$  in 50 mM Tris-HCl pH 7.4 buffer + 1% DMSO- $d_6$ . Values in Table 1 are extrapolations of the linear fits presented in this plot.  $R^2$  values for all fits were over 0.99.

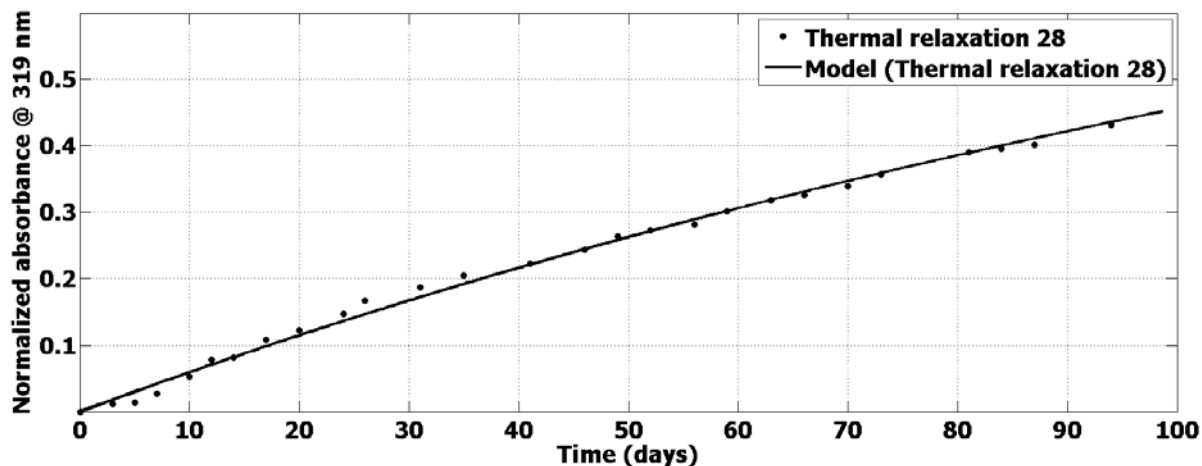

Figure S2: Thermal relaxation curve of 25  $\mu\text{M}$  of compound 28 in 50 mM Tris-HCl pH 7.4 buffer containing 1% DMSO- $d_6$  at  $20 \pm 3$   $^\circ\text{C}$  normalized using the >99% *trans* samples as reference. The sample was illuminated for 10 minutes at  $360 \pm 20$  nm prior to thermal relaxation. The relaxation was followed by recording absorbance at 319 nm. An exponential fit was used to obtain the thermal relaxation half-life ( $t_{1/2} = 114$  days).  $R^2 = 0.9956$ .

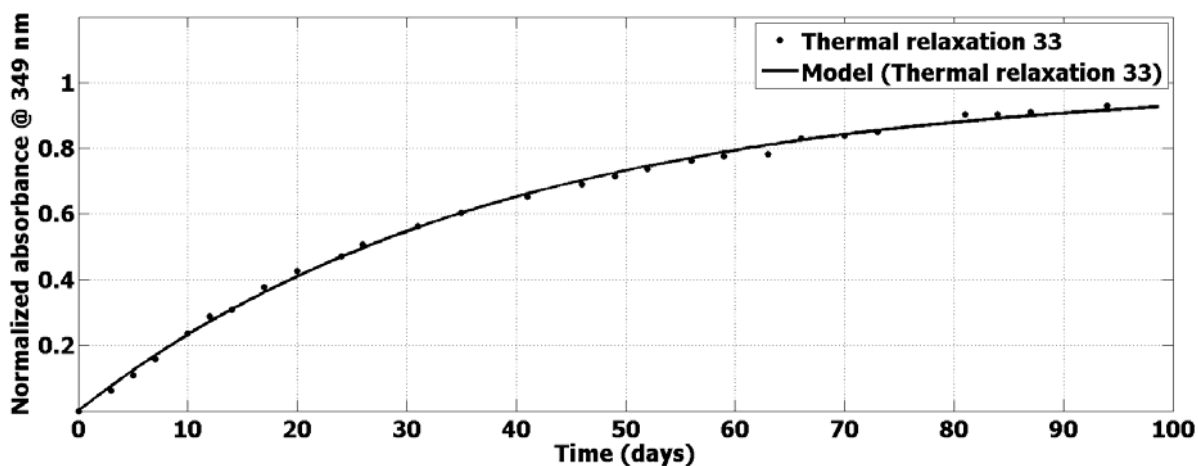

Figure S3: Thermal relaxation curve of 25  $\mu\text{M}$  of compound 33 in 50 mM Tris-HCl pH 7.4 buffer containing 1% DMSO- $d_6$  at  $20 \pm 3$   $^\circ\text{C}$  normalized using the >99% *trans* samples as reference. The sample was illuminated for 10 minutes at  $360 \pm 20$  nm prior to thermal relaxation. The relaxation was followed by recording absorbance at 349 nm. An exponential fit was used to obtain the thermal relaxation half-life ( $t_{1/2} = 26.3$  days).  $R^2 = 0.9982$ .

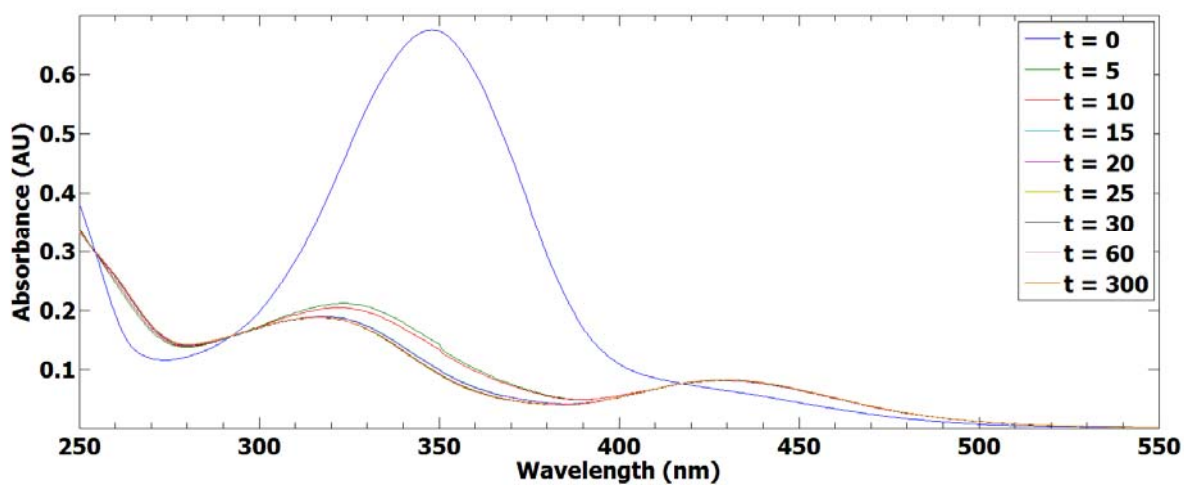

Figure S4: Illumination of 25  $\mu\text{M}$  of compound 33 (*trans*) in 50 mM Tris-HCl pH 7.4 buffer containing 1% DMSO- $d_6$  using  $360 \pm 20$  nm. Value t is in seconds.

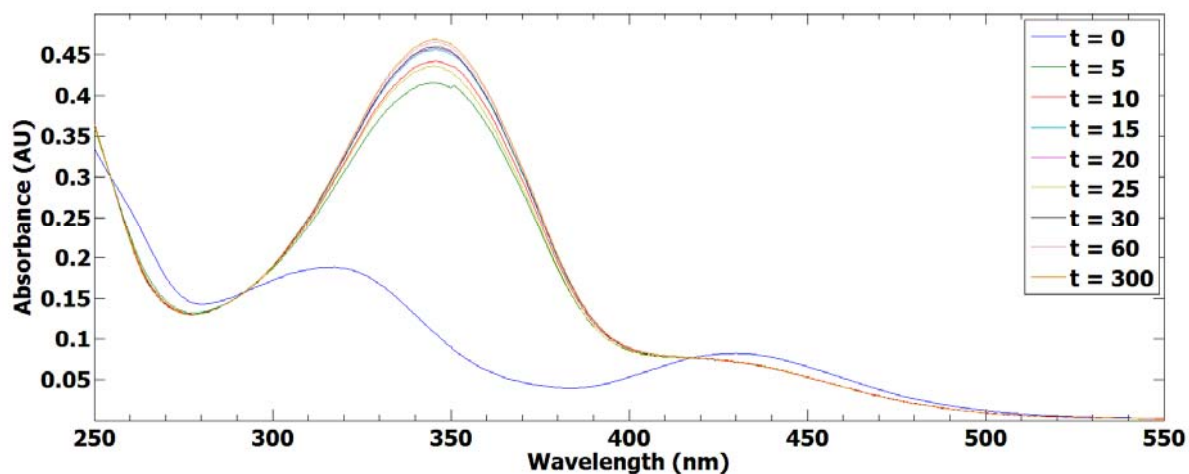

Figure S5: Illumination of 25  $\mu\text{M}$  of compound 33 (PSS *cis*, obtained as shown in Figure S4) in 50 mM Tris-HCl pH 7.4 buffer containing 1% DMSO- $d_6$  using  $434 \pm 9$  nm. Value t is in seconds.

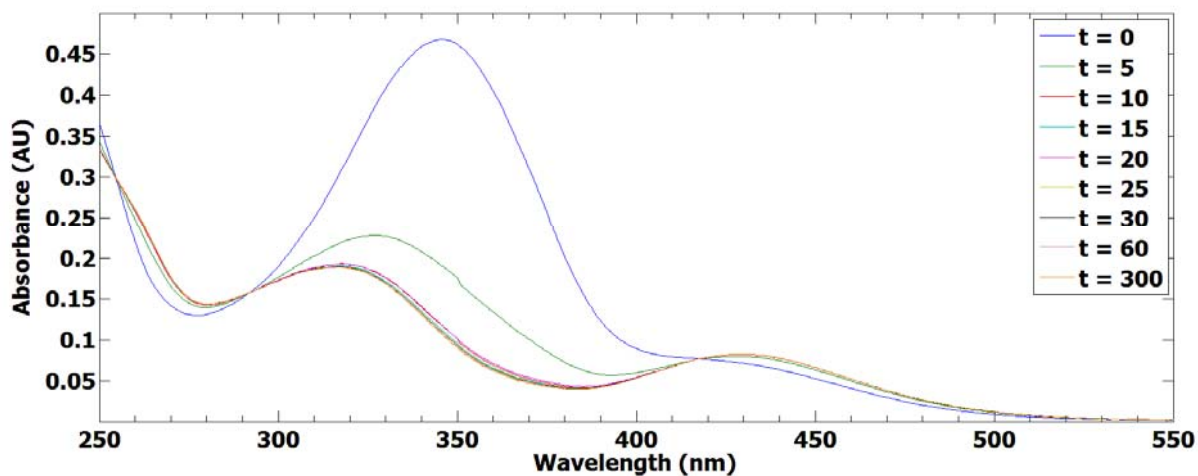

Figure S6: Illumination of 25  $\mu\text{M}$  of compound 33 (PSS *trans*, obtained as shown in Figure S5) in 50 mM Tris-HCl pH 7.4 buffer containing 1% DMSO- $d_6$  using  $360 \pm 20$  nm. Value  $t$  is in seconds.

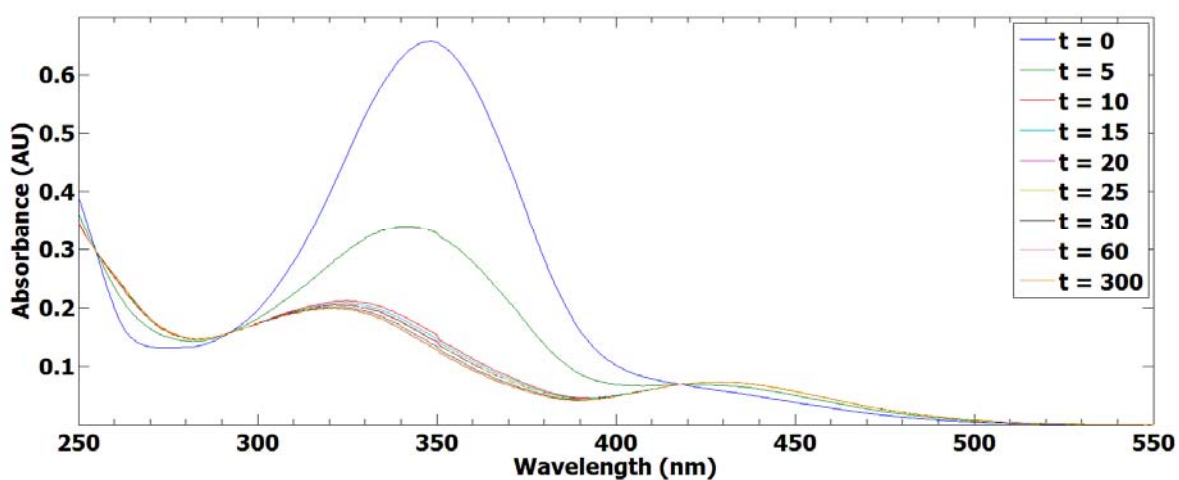

Figure S7: Illumination of 25  $\mu\text{M}$  of compound 33 (*trans*) in a pH 7.4 buffer containing 15 mM HEPES, 64 mM NaCl, 25 mM KCl, 0.4 mM CaCl<sub>2</sub> and 0.8 mM MgCl<sub>2</sub> containing 1% DMSO- $d_6$  using  $360 \pm 20$  nm. Value  $t$  is in seconds.

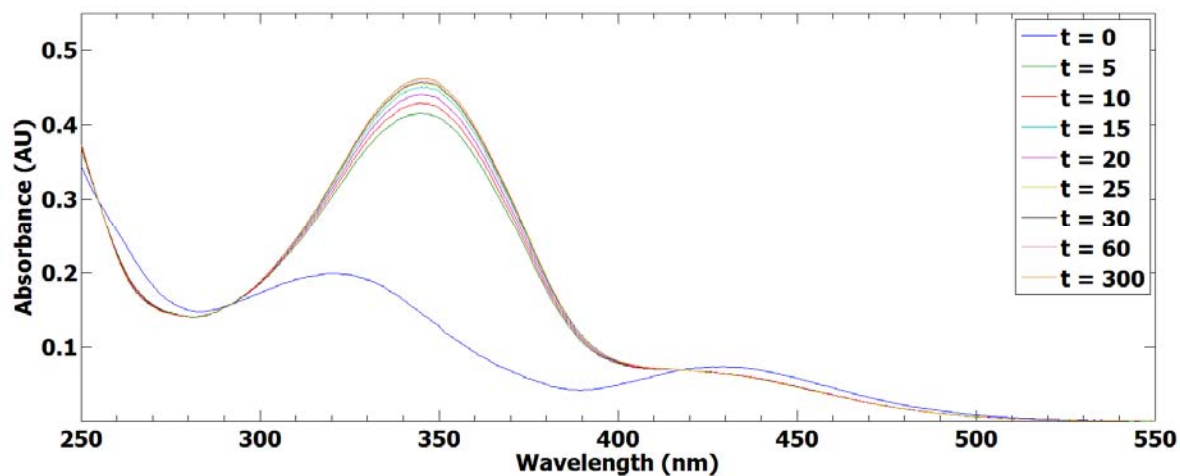

Figure S8: Illumination of 25  $\mu$ M of compound 33 (PSS *cis*, obtained as shown in Figure S7) in a pH 7.4 buffer containing 15 mM HEPES, 64 mM NaCl, 25 mM KCl, 0.4 mM CaCl<sub>2</sub> and 0.8 mM MgCl<sub>2</sub> containing 1% DMSO-*d*<sub>6</sub> using 434  $\pm$  9 nm. Value  $t$  is in seconds.

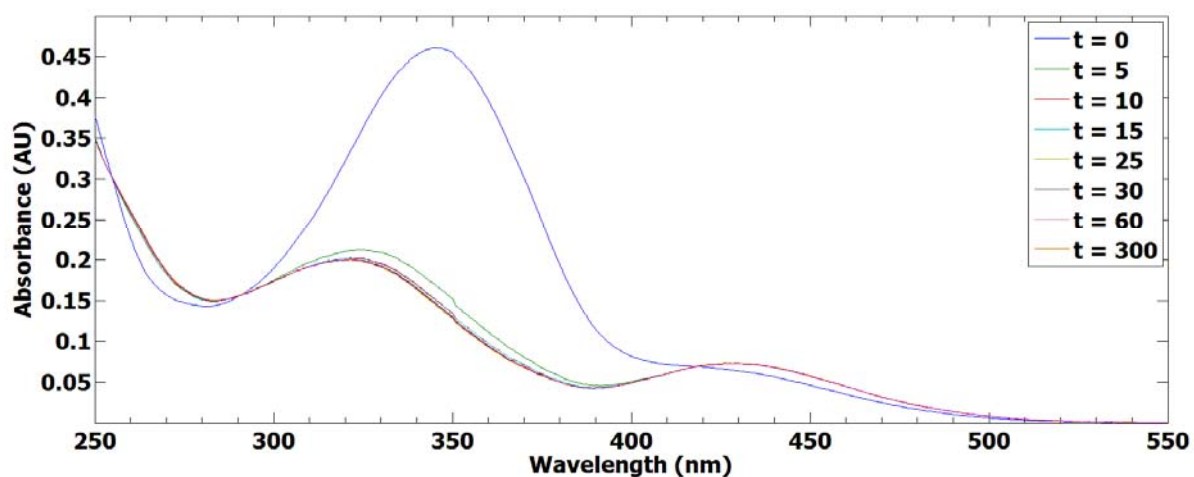

Figure S9: Illumination of 25  $\mu$ M of compound 33 (PSS *trans*, obtained as shown in Figure S8) in a pH 7.4 buffer containing 15 mM HEPES, 64 mM NaCl, 25 mM KCl, 0.4 mM CaCl<sub>2</sub> and 0.8 mM MgCl<sub>2</sub> containing 1% DMSO-*d*<sub>6</sub> using 360  $\pm$  20 nm. Value  $t$  is in seconds.

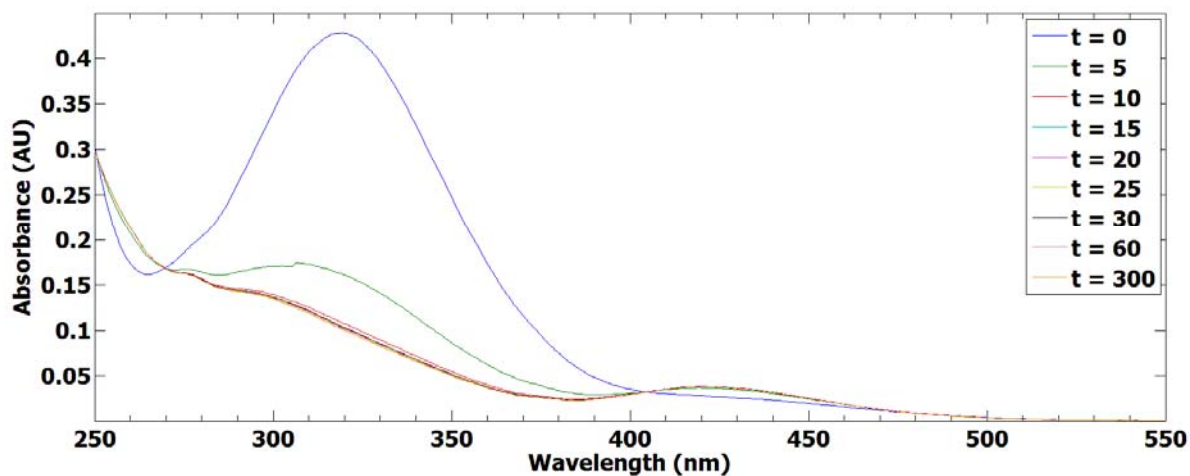

Figure S10: Illumination of 25  $\mu\text{M}$  of compound 28 (*trans*) in 50 mM Tris-HCl pH 7.4 buffer containing 1% DMSO- $d_6$  using  $360 \pm 20$  nm. Value t is in seconds.

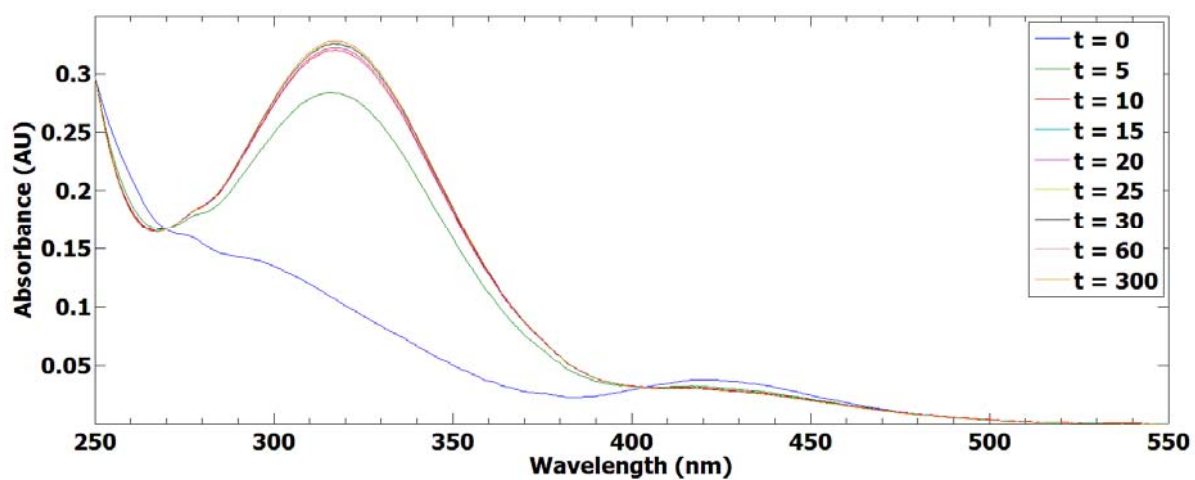

Figure S11: Illumination of 25  $\mu\text{M}$  of compound 28 (PSS *cis*, obtained as shown in Figure S10) in 50 mM Tris-HCl pH 7.4 buffer containing 1% DMSO- $d_6$  using  $434 \pm 9$  nm. Value t is in seconds.



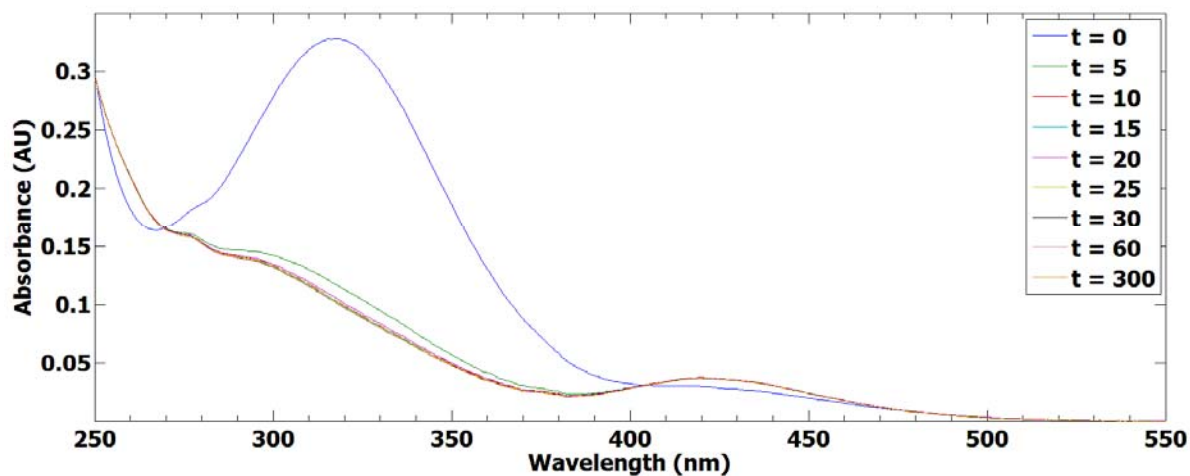

Figure S12: Illumination of 25  $\mu\text{M}$  of compound 28 (PSS *trans*, obtained as shown in Figure S11) in 50 mM Tris-HCl pH 7.4 buffer containing 1% DMSO- $d_6$  using  $360 \pm 20$  nm. Value t is in seconds.

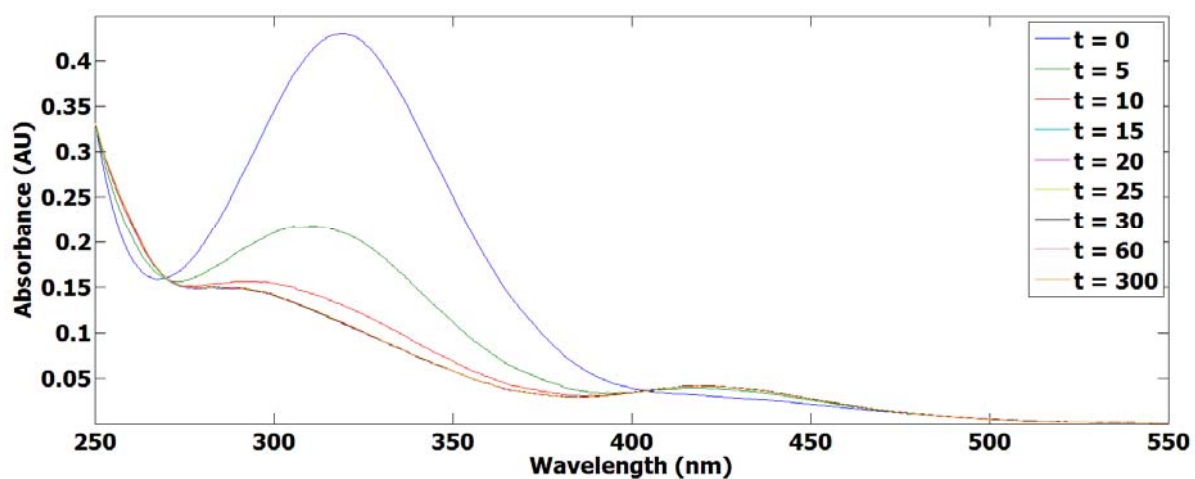

Figure S13: Illumination of 25  $\mu\text{M}$  of compound 28 (*trans*) in a pH 7.4 buffer containing 15 mM HEPES, 64 mM NaCl, 25 mM KCl, 0.4 mM CaCl $_2$  and 0.8 mM MgCl $_2$  containing 1% DMSO- $d_6$  using  $360 \pm 20$  nm. Value t is in seconds.

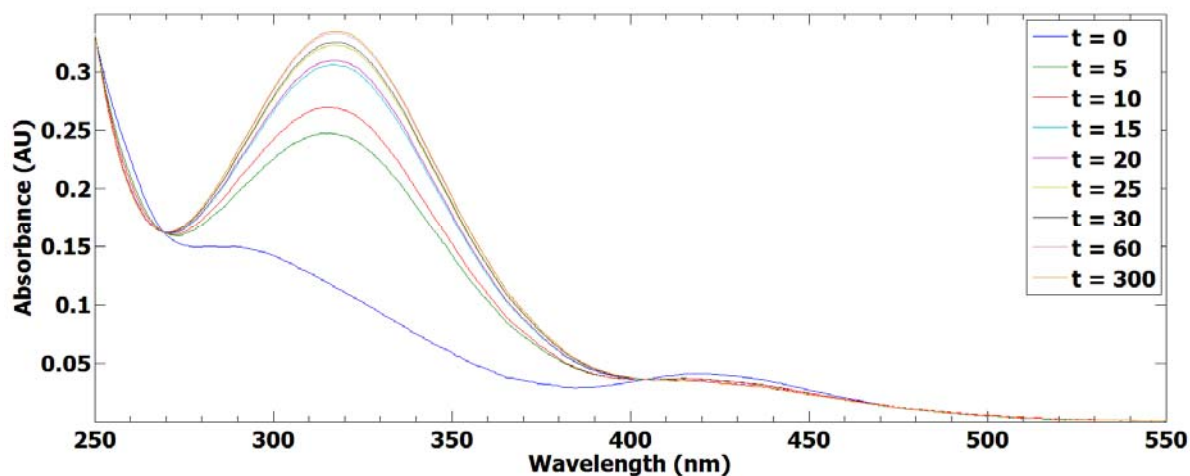

Figure S14: Illumination of 25  $\mu$ M of compound 28 (PSS *cis*, obtained as shown in Figure S13) in a pH 7.4 buffer containing 15 mM HEPES, 64 mM NaCl, 25 mM KCl, 0.4 mM CaCl<sub>2</sub> and 0.8 mM MgCl<sub>2</sub> containing 1% DMSO-*d*<sub>6</sub> using 434  $\pm$  9 nm. Value  $t$  is in seconds.

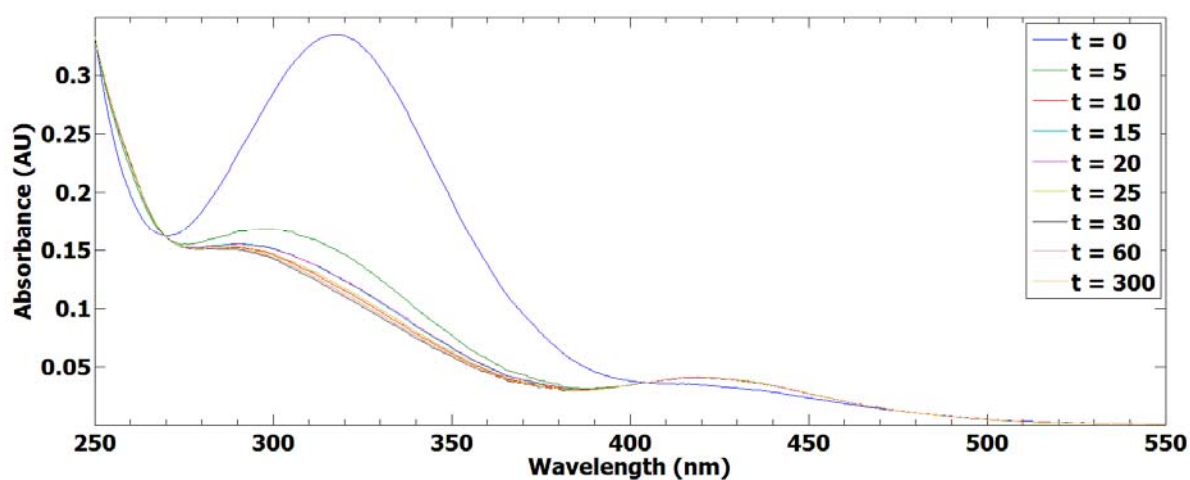

Figure S15: Illumination of 25  $\mu$ M of compound 28 (PSS *trans*, obtained as shown in Figure S14) in a pH 7.4 buffer containing 15 mM HEPES, 64 mM NaCl, 25 mM KCl, 0.4 mM CaCl<sub>2</sub> and 0.8 mM MgCl<sub>2</sub> containing 1% DMSO-*d*<sub>6</sub> using 360  $\pm$  20 nm. Value  $t$  is in seconds.

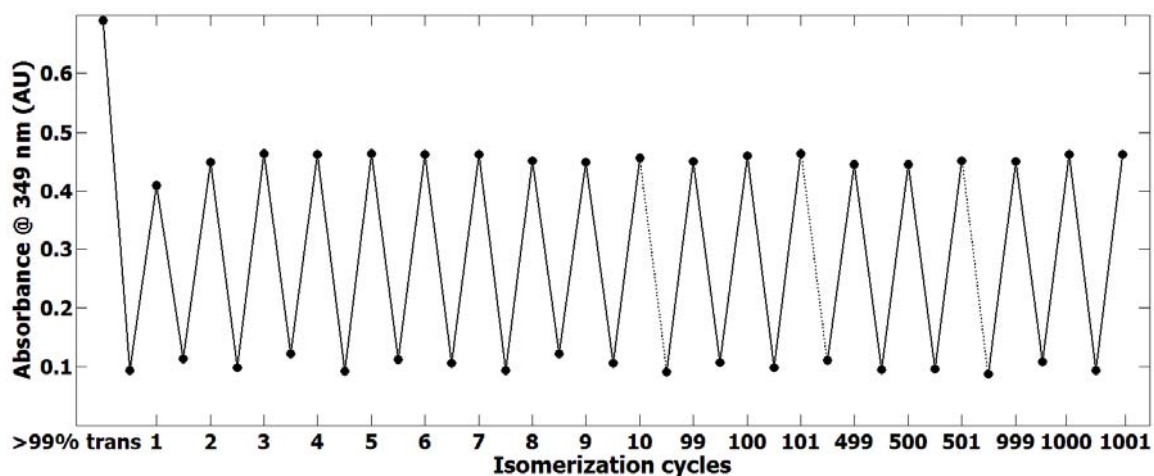

Figure S16: Repeated isomerization cycles of 25  $\mu\text{M}$  of compound 33 in a pH 7.4 buffer containing 15 mM HEPES, 64 mM NaCl, 25 mM KCl, 0.4 mM  $\text{CaCl}_2$ , 0.8 mM  $\text{MgCl}_2$  and 1%  $\text{DMSO-}d_6$  analyzed at 349 nm. PSS *cis* was obtained by using illuminations for 20 seconds at  $360 \pm 20$  nm. PSS *trans* was obtained by using illuminations for 20 seconds at  $434 \pm 9$  nm. The dotted lines indicate larger numbers of cycles which are not presented here.

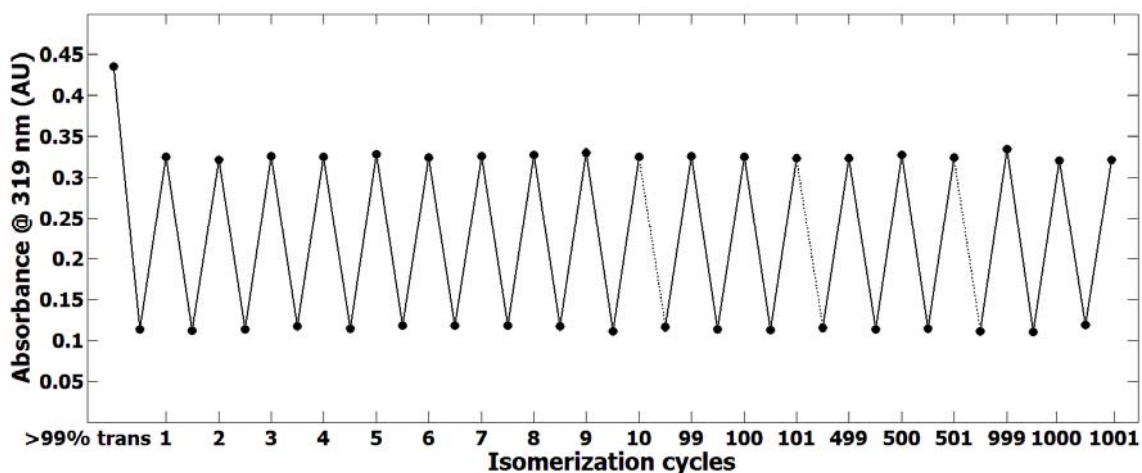

Figure S17: Repeated isomerization cycles of 25  $\mu\text{M}$  of compound 28 in a pH 7.4 buffer containing 15 mM HEPES, 64 mM NaCl, 25 mM KCl, 0.4 mM  $\text{CaCl}_2$ , 0.8 mM  $\text{MgCl}_2$  and 1%  $\text{DMSO-}d_6$  analyzed at 319 nm. PSS *cis* was obtained by using illuminations for 20 seconds at  $360 \pm 20$  nm. PSS *trans* was obtained by using illuminations for 20 seconds at  $434 \pm 9$  nm. The dotted lines indicate larger numbers of cycles which are not presented here.

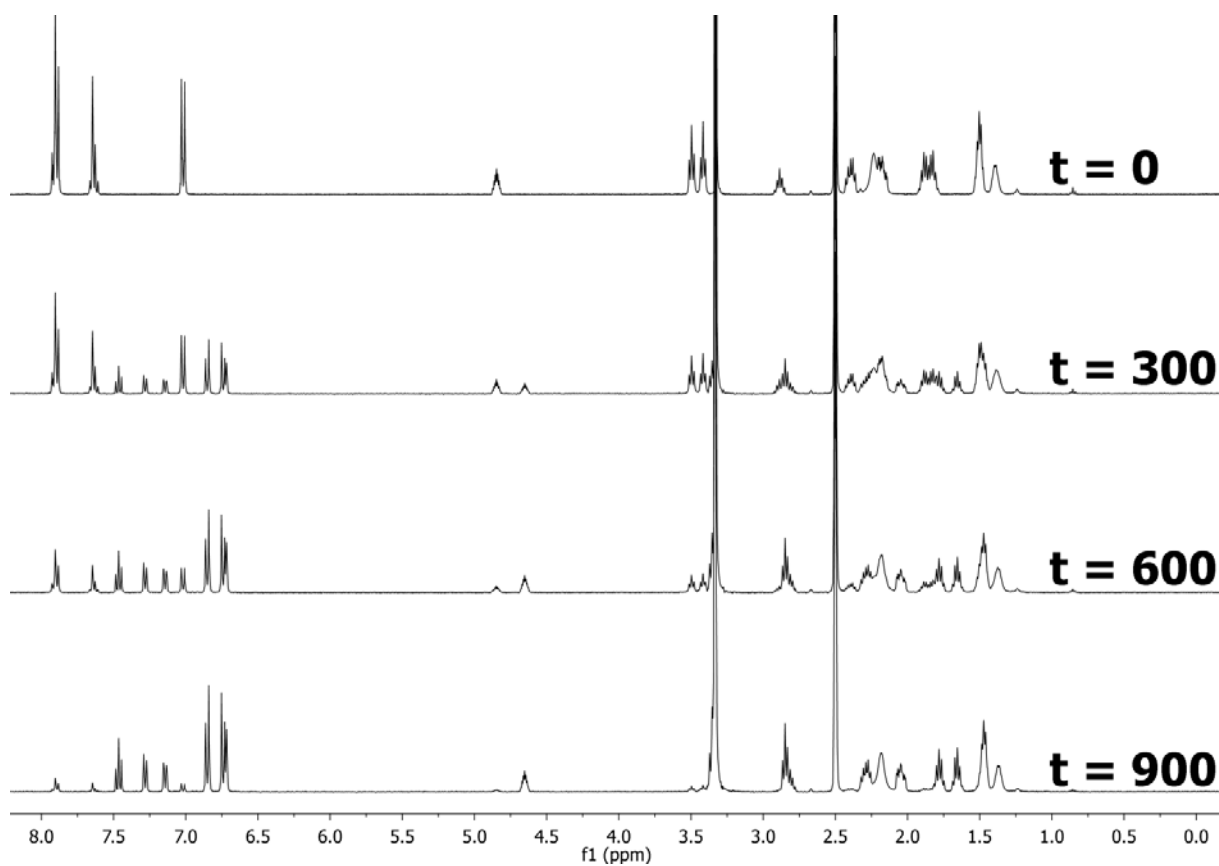

Figure S18:  $^1\text{H-NMR}$  spectra of an illumination with  $360 \pm 20$  nm of 10 mM of compound 33 in  $\text{DMSO-}d_6$ . Value  $t$  is illumination time in seconds.

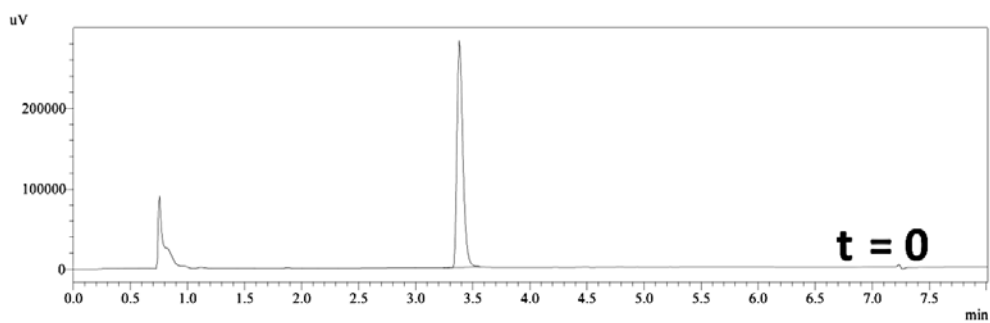

| Peak# | Name | Ret. Time | Area    | Area %  |
|-------|------|-----------|---------|---------|
| 1     |      | 3.378     | 1007880 | 100.000 |

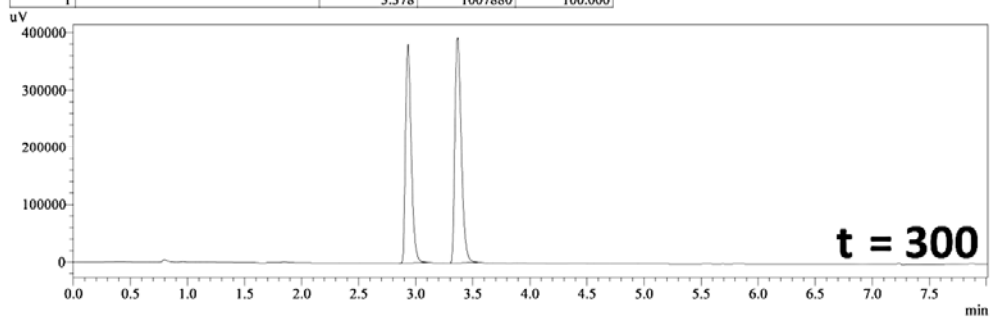

| Peak# | Name | Ret. Time | Area    | Area % |
|-------|------|-----------|---------|--------|
| 1     |      | 2.926     | 1336189 | 46.496 |
| 2     |      | 3.361     | 1537564 | 53.504 |

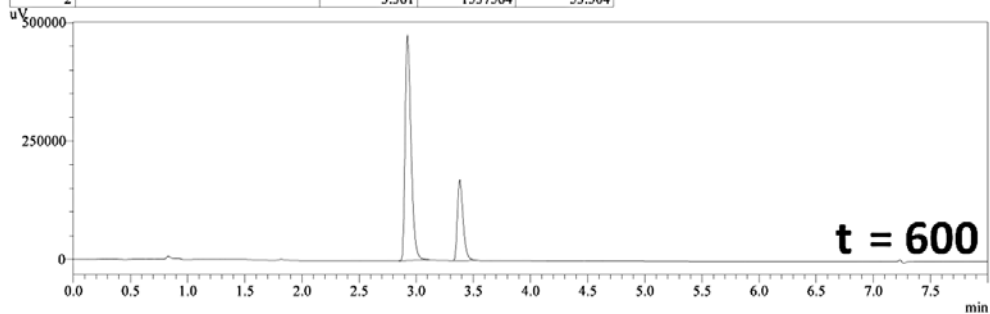

| Peak# | Name | Ret. Time | Area    | Area % |
|-------|------|-----------|---------|--------|
| 1     |      | 2.920     | 1726634 | 74.916 |
| 2     |      | 3.377     | 578140  | 25.084 |

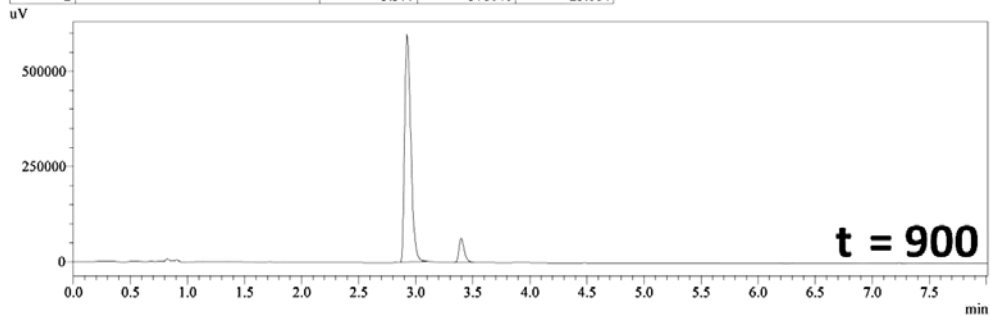

| Peak# | Name | Ret. Time | Area    | Area % |
|-------|------|-----------|---------|--------|
| 1     |      | 2.920     | 2252756 | 91.773 |
| 2     |      | 3.393     | 201943  | 8.227  |

Figure S19: LC chromatograms corresponding to the experiment and <sup>1</sup>H-NMR spectra shown in Figure S18. Value t is illumination time in seconds.

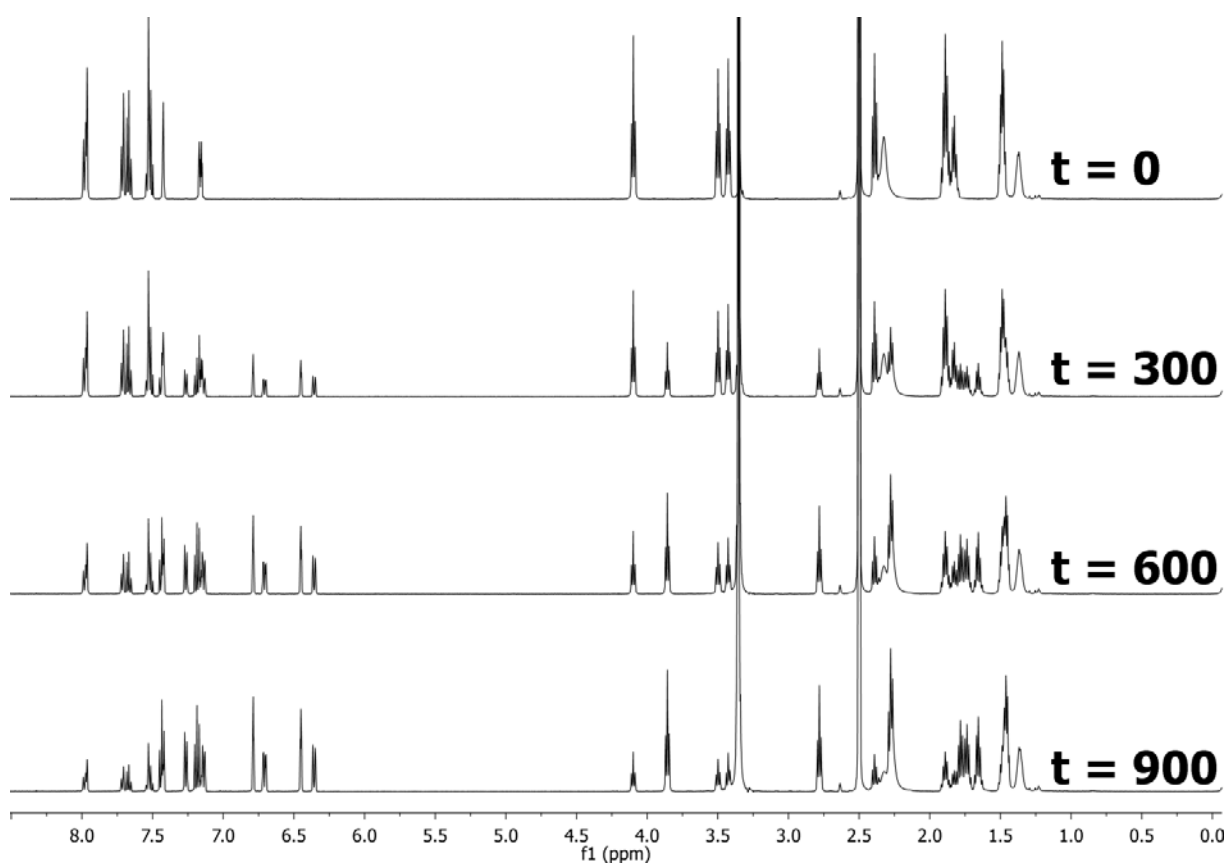

Figure S20: <sup>1</sup>H-NMR spectra of an illumination with  $360 \pm 20$  nm of 10 mM of compound 28 in DMSO-*d*<sub>6</sub>. Value t is illumination time in seconds.

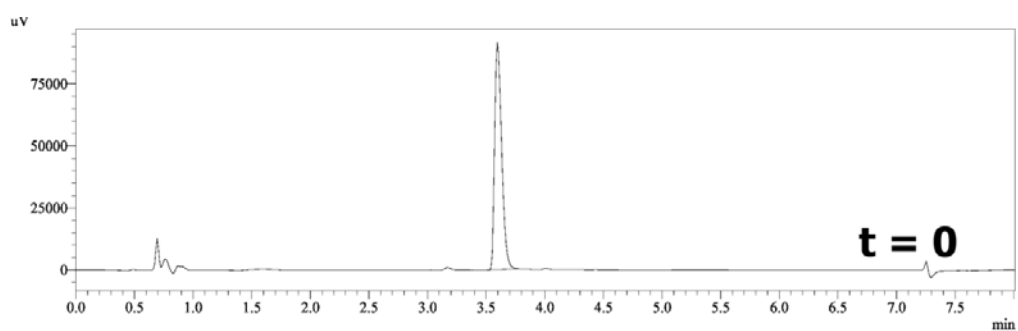

PDA Ch1 254nm 4nm

| Peak# | Name | Ret. Time | Area   | Area %  |
|-------|------|-----------|--------|---------|
| 1     |      | 3.592     | 380903 | 100.000 |

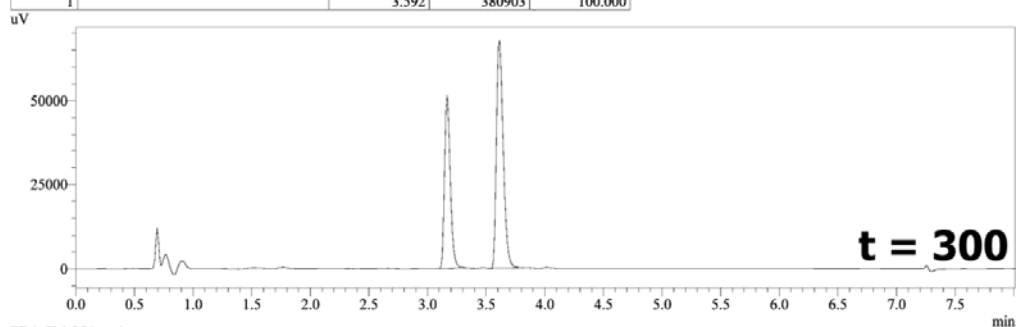

PDA Ch1 254nm 4nm

| Peak# | Name | Ret. Time | Area   | Area % |
|-------|------|-----------|--------|--------|
| 1     |      | 3.161     | 173644 | 39.035 |
| 2     |      | 3.606     | 271204 | 60.965 |

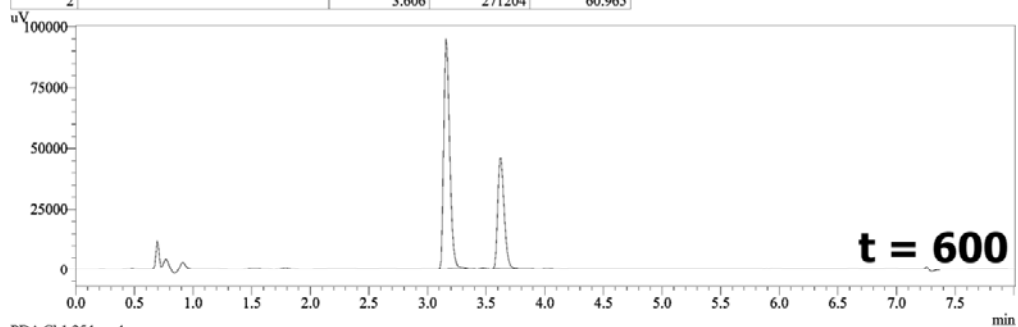

PDA Ch1 254nm 4nm

| Peak# | Name | Ret. Time | Area   | Area % |
|-------|------|-----------|--------|--------|
| 1     |      | 3.155     | 336409 | 65.925 |
| 2     |      | 3.616     | 173885 | 34.075 |

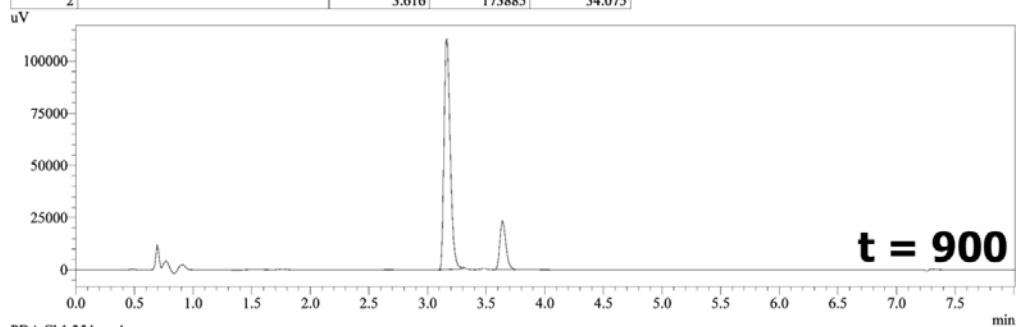

PDA Ch1 254nm 4nm

| Peak# | Name | Ret. Time | Area   | Area % |
|-------|------|-----------|--------|--------|
| 1     |      | 3.158     | 405411 | 83.074 |
| 2     |      | 3.634     | 82602  | 16.926 |

Figure S21: LC chromatograms corresponding to the experiment and <sup>1</sup>H-NMR spectra shown in Figure S20. Value t is illumination time in seconds.

**Table S1: Correlation between <sup>1</sup>H-NMR and LC-MS area percentages of 10 mM compound in DMSO-*d*<sub>6</sub> under illumination with 360 ± 20 nm for the indicated duration. Aliquots were diluted 100 times in Tris-HCl pH 7.4 buffer prior to LC-MS analysis. The photostationary states of the compounds were not reached at any of the chosen time points.**

**Compound 33**

| time (s) | <sup>1</sup> H-NMR |              | LC-MS          |              |
|----------|--------------------|--------------|----------------|--------------|
|          | % <i>trans</i>     | % <i>cis</i> | % <i>trans</i> | % <i>cis</i> |
| 0        | >95                | <5           | >99            | <1           |
| 300      | 58.53              | 41.47        | 53.50          | 46.50        |
| 600      | 26.81              | 73.19        | 25.08          | 74.92        |
| 900      | 7.00               | 93.00        | 8.23           | 91.77        |

**Compound 28**

| time (s) | <sup>1</sup> H-NMR |              | LC-MS          |              |
|----------|--------------------|--------------|----------------|--------------|
|          | % <i>trans</i>     | % <i>cis</i> | % <i>trans</i> | % <i>cis</i> |
| 0        | >95                | <5           | >99            | <1           |
| 300      | 66.74              | 33.26        | 60.96          | 39.04        |
| 600      | 38.88              | 61.12        | 34.07          | 65.93        |
| 900      | 24.56              | 75.44        | 16.93          | 83.07        |

**Table S2: Overview of binding affinities of 33 and 28 on the hH<sub>1</sub>R, hH<sub>2</sub>R, hH<sub>3</sub>R and hH<sub>4</sub>R transiently expressed on HEK293T cells. Competition binding experiments were performed at least in triplicates. N/A=not applicable.**

**Compound 33**

| Receptor          | pK <sub>i</sub> (>99% <i>trans</i> ) ± SEM | pK <sub>i</sub> (PSS <i>cis</i> ) ± SEM | pK <sub>i</sub> -shift |
|-------------------|--------------------------------------------|-----------------------------------------|------------------------|
| hH <sub>1</sub> R | 6.65 ± 0.13                                | 5.61 ± 0.07                             | -1.05                  |
| hH <sub>2</sub> R | < 5                                        | < 5                                     | N/A                    |
| hH <sub>3</sub> R | 8.76 ± 0.09                                | 7.71 ± 0.09                             | -1.05                  |
| hH <sub>4</sub> R | < 5                                        | < 5                                     | N/A                    |

**Compound 28**

| Receptor          | pK <sub>i</sub> (>99% <i>trans</i> ) ± SEM | pK <sub>i</sub> (PSS <i>cis</i> ) ± SEM | pK <sub>i</sub> -shift |
|-------------------|--------------------------------------------|-----------------------------------------|------------------------|
| hH <sub>1</sub> R | < 5                                        | 6.23 ± 0.01                             | > 1.3                  |
| hH <sub>2</sub> R | < 5                                        | < 5                                     | N/A                    |
| hH <sub>3</sub> R | 6.19 ± 0.11                                | 7.32 ± 0.04                             | 1.13                   |
| hH <sub>4</sub> R | < 5                                        | < 5                                     | N/A                    |



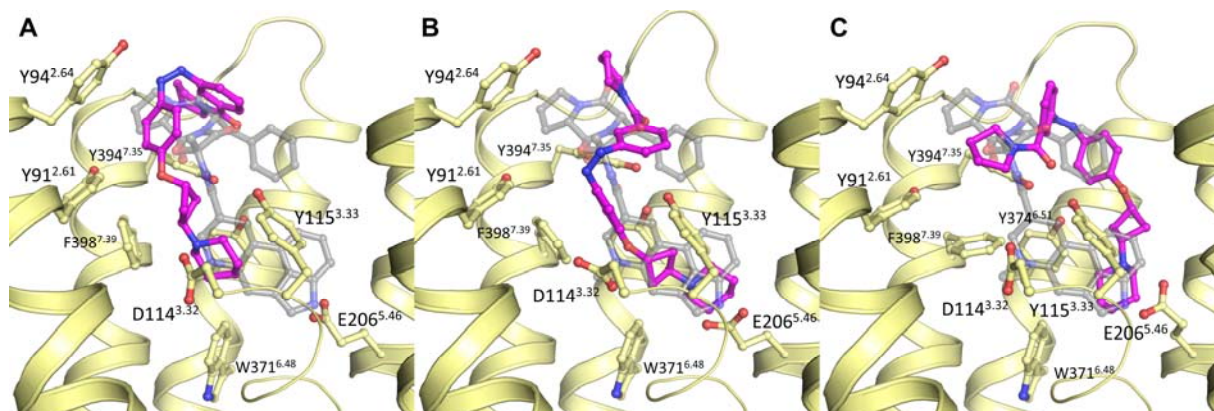

Figure S22: Overview of the three distinct binding modes obtained for compounds 28 and 33 using docking into a series of H<sub>3</sub>R homology models (before performing MD simulations). A) Binding mode 1: D114<sup>3.32</sup> serves as the ionic anchor and the ligand moves via TMs 2, 3, and 7 towards the extracellular vestibule (ECV). B) Binding mode 2: E206<sup>5.46</sup> serves as the ionic anchor and the ligand moves from TM5 to TM3 and upward via TMs 2, 3, and 7 towards the ECV. C) Binding mode 3: E206<sup>5.46</sup> serves as the ionic anchor and the ligands moves upwards via TMs 5 and 6 towards the ECV. The *cis* isomer of 33 is shown with magenta carbon atoms and the binding mode of ergotamine in 5-HT<sub>1B</sub> (PDB ID 4IAR) is shown with transparent gray carbon atoms. For clarity purposes the binding modes of 28 and the *trans* isomer of 33, parts of the ribbon/cartoon for ECL1/TM3 and ECL2, and the label for Y374<sup>6.51</sup> (in panel A and B) are not shown.

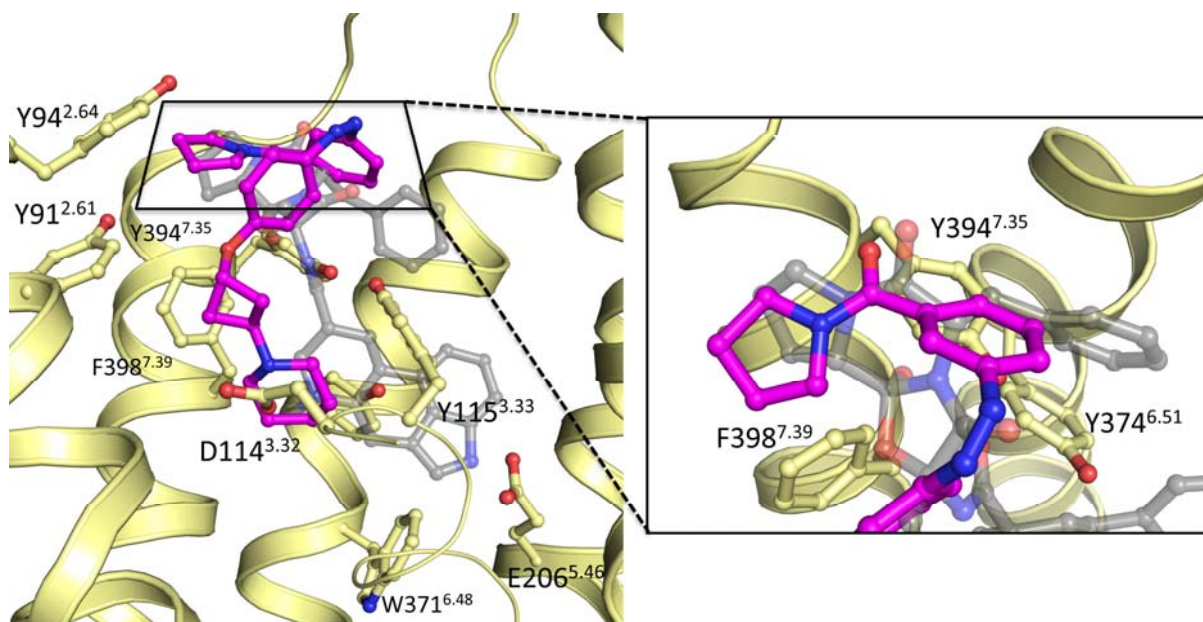

Figure S23: The similarity between the proposed binding mode for the *cis*-isomer of compound 33 after MD simulation and the binding mode of ergotamine in 5-HT<sub>1B</sub> (PDB ID 4IAR). The inset highlights the overlay of the carboxamide moiety of 33 with the pyrrolidine of ergotamine.

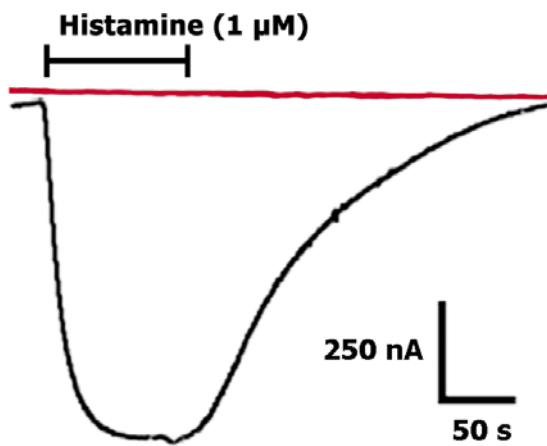

Figure S24: TEVC time trace of 1  $\mu M$  histamine on  $H_3R$ -GIRK expressing *Xenopus* oocytes (black) or non-injected *Xenopus* oocytes (red) in a continuous perfusion system.

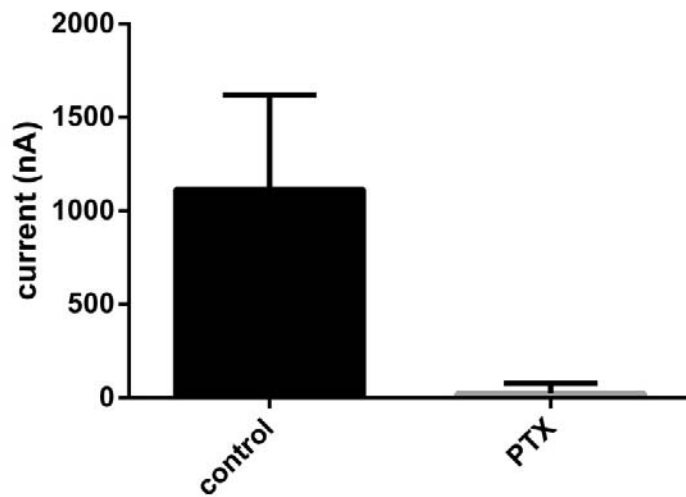

Figure S25: Response at 1  $\mu M$  histamine (control) and 1  $\mu M$  histamine after injection of 1.37 ng of pertussis toxin (PTX) on GIRK- $H_3R$  expressing *Xenopus* oocytes.

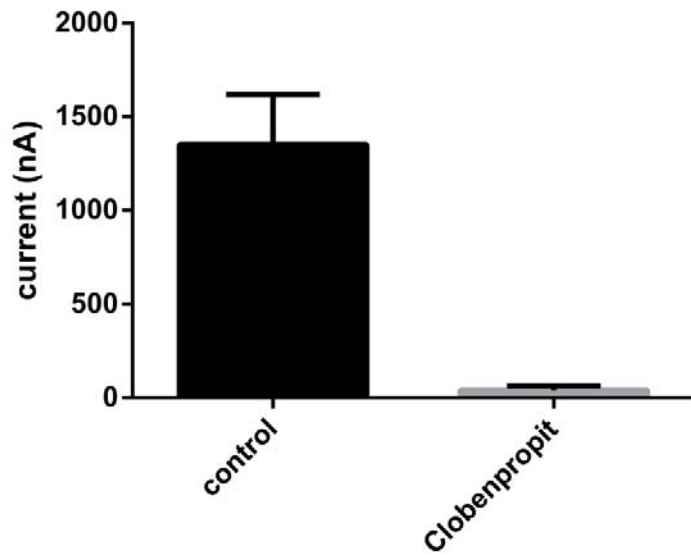

Figure S26: Response at 1  $\mu\text{M}$  histamine (control) and 1  $\mu\text{M}$  histamine in competition with 1  $\mu\text{M}$  clobenpropit on GIRK-H<sub>3</sub>R expressing *Xenopus* oocytes.

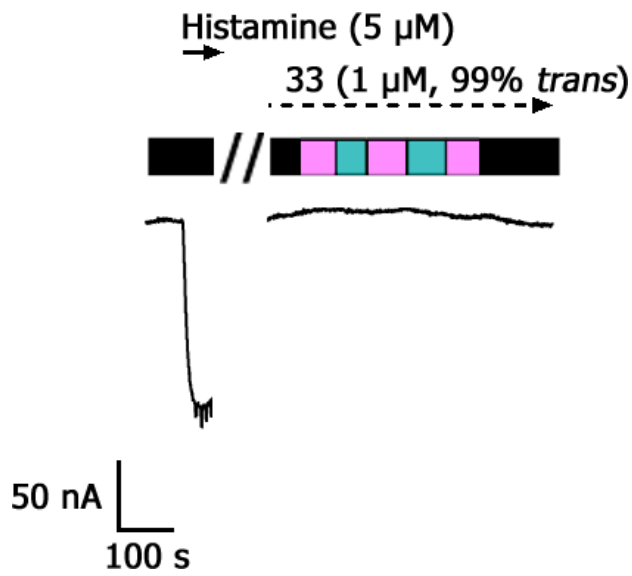

Figure S27: TEVC time trace of 5  $\mu\text{M}$  histamine and 1  $\mu\text{M}$  of 33 on H<sub>3</sub>R-GIRK expressing *Xenopus* oocytes in a continuous perfusion system using illuminations at 360  $\pm$  20 nm (magenta), 434  $\pm$  9 nm (cyan) or without illumination (black).

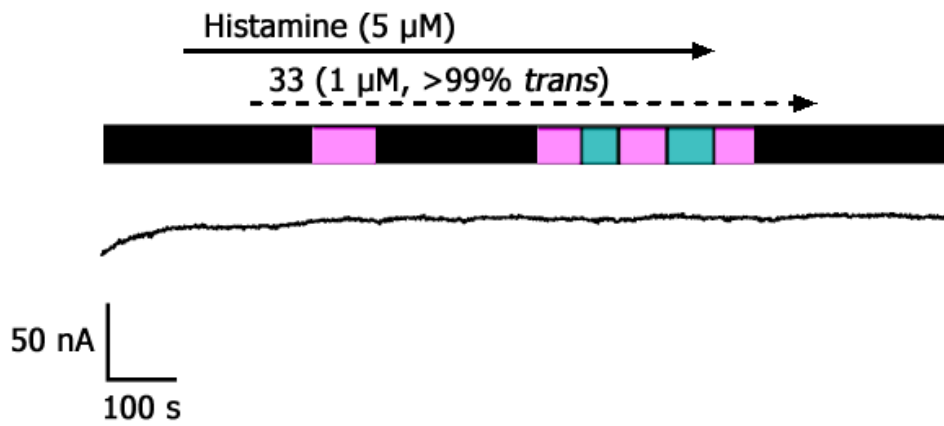

Figure S28: TEVC time trace of 5 μM histamine and 1 μM of 33 on non-injected *Xenopus* oocytes in a continuous perfusion system using illuminations at  $360 \pm 20$  nm (magenta),  $434 \pm 9$  nm (cyan) or without illumination (black).

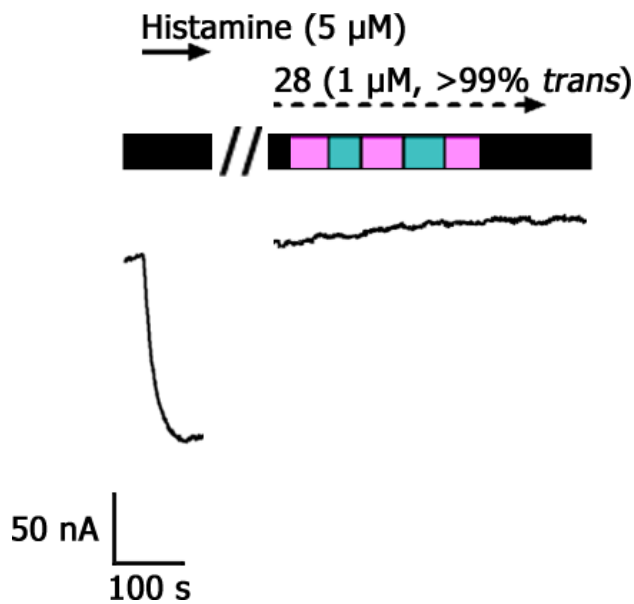

Figure S29: TEVC time trace of 5 μM histamine and 1 μM of 28 on H<sub>3</sub>R-GIRK expressing *Xenopus* oocytes in a continuous perfusion system using illuminations at  $360 \pm 20$  nm (magenta),  $434 \pm 9$  nm (cyan) or without illumination (black).

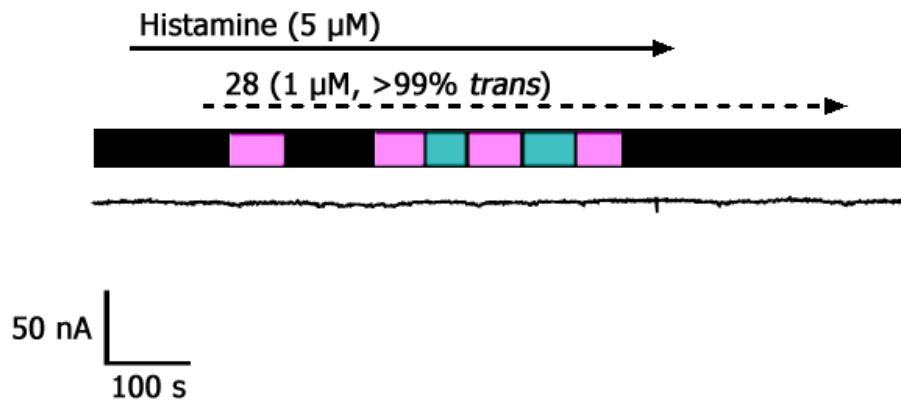

Figure S30: TEVC time trace of 5  $\mu\text{M}$  histamine and 1  $\mu\text{M}$  of 28 on non-injected *Xenopus* oocytes in a continuous perfusion system using illuminations at  $360 \pm 20$  nm (magenta),  $434 \pm 9$  nm (cyan) or without illumination (black).

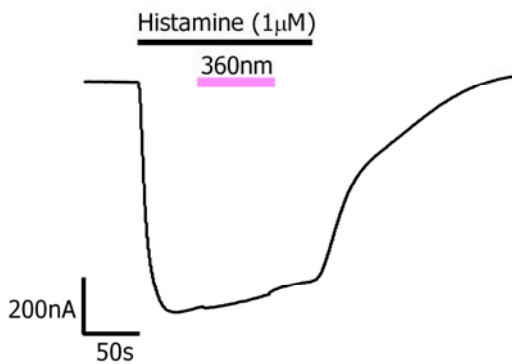

Figure S31: TEVC time trace of 1  $\mu\text{M}$  histamine on GIRK- $\text{H}_3\text{R}$  expressing *Xenopus* oocytes using illumination at  $360 \pm 20$  nm (magenta).

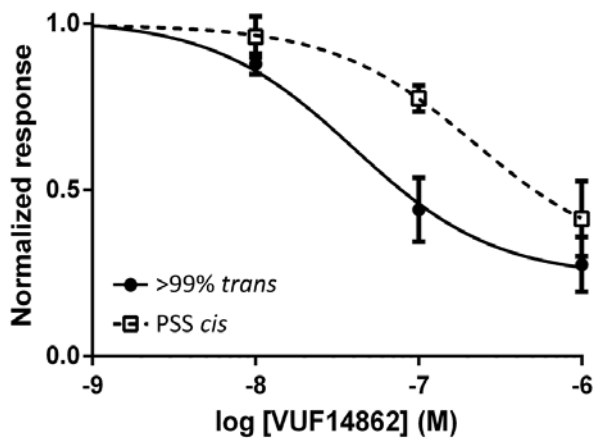

Figure S32: Concentration-response relationship for activation of GIRK current of 1  $\mu\text{M}$  histamine in competition with 33 (VUF14862) on *Xenopus* oocytes expressing  $\text{H}_3\text{R}$  coupled to GIRK measured using TEVC.

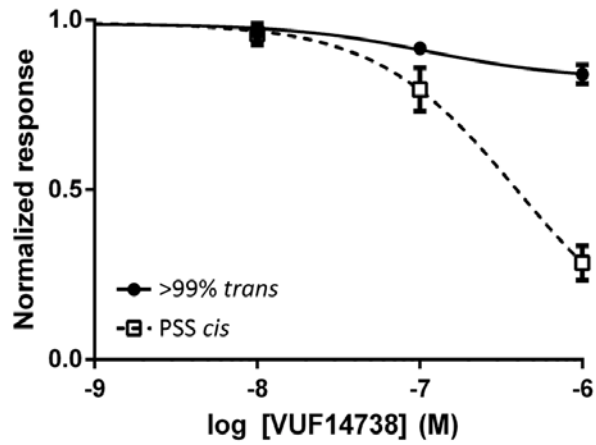

Figure S33: Concentration-response relationship for activation of GIRK current of 1  $\mu\text{M}$  histamine in competition with 28 (VUF14738) on *Xenopus* oocytes expressing  $\text{H}_3\text{R}$  coupled to GIRK measured using TEVC.

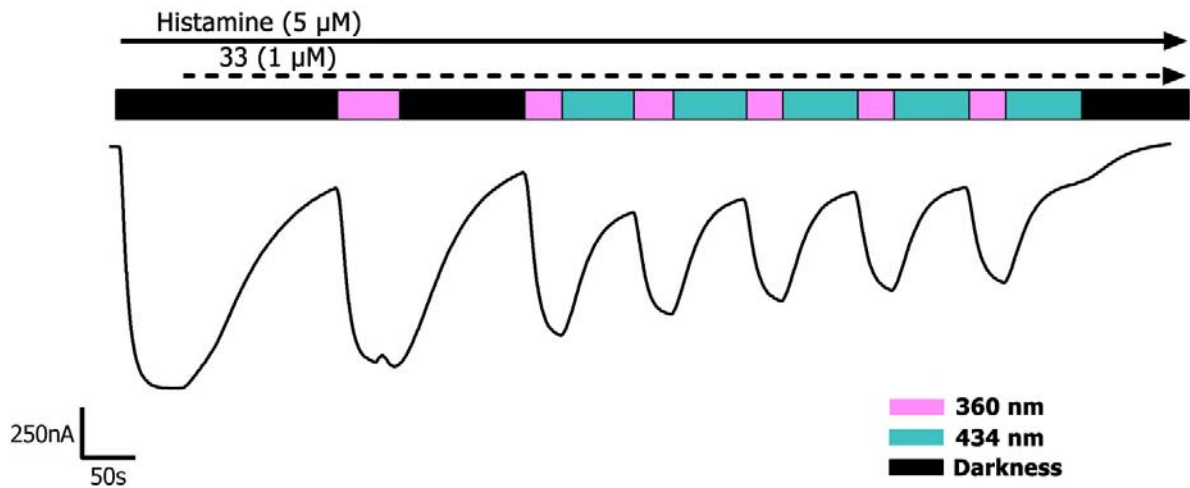

Figure S34: TEVC time trace of 5  $\mu\text{M}$  histamine in competition with 1  $\mu\text{M}$  of compound 33 (>99% *trans*) on GIRK- $\text{H}_3\text{R}$  expressing *Xenopus* oocytes in a continuous perfusion system using illuminations at  $360 \pm 20$  nm (magenta),  $434 \pm 9$  nm (cyan) or without illumination (black, perfusion with >99% *trans* compound still ongoing).

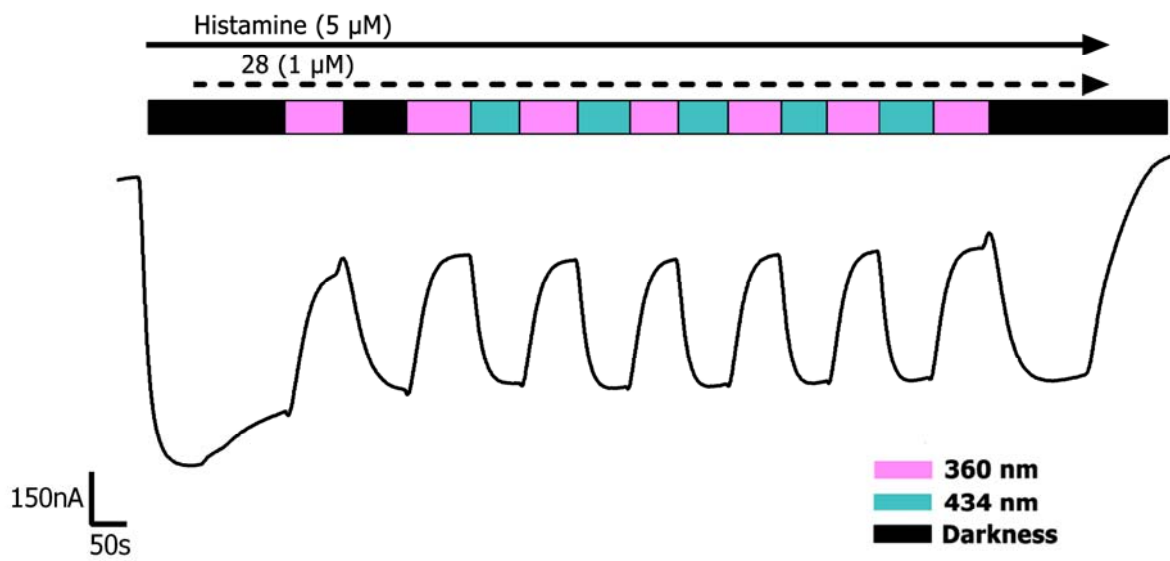

Figure S35: TEVC time trace of 5  $\mu\text{M}$  histamine in competition with 1  $\mu\text{M}$  of compound 28 (>99% *trans*) on GIRK-H<sub>3</sub>R expressing *Xenopus* oocytes in a continuous perfusion system using illuminations at 360  $\pm$  20 nm (magenta), 434  $\pm$  9 nm (cyan) or without illumination (black, perfusion with >99% *trans* compound still ongoing).

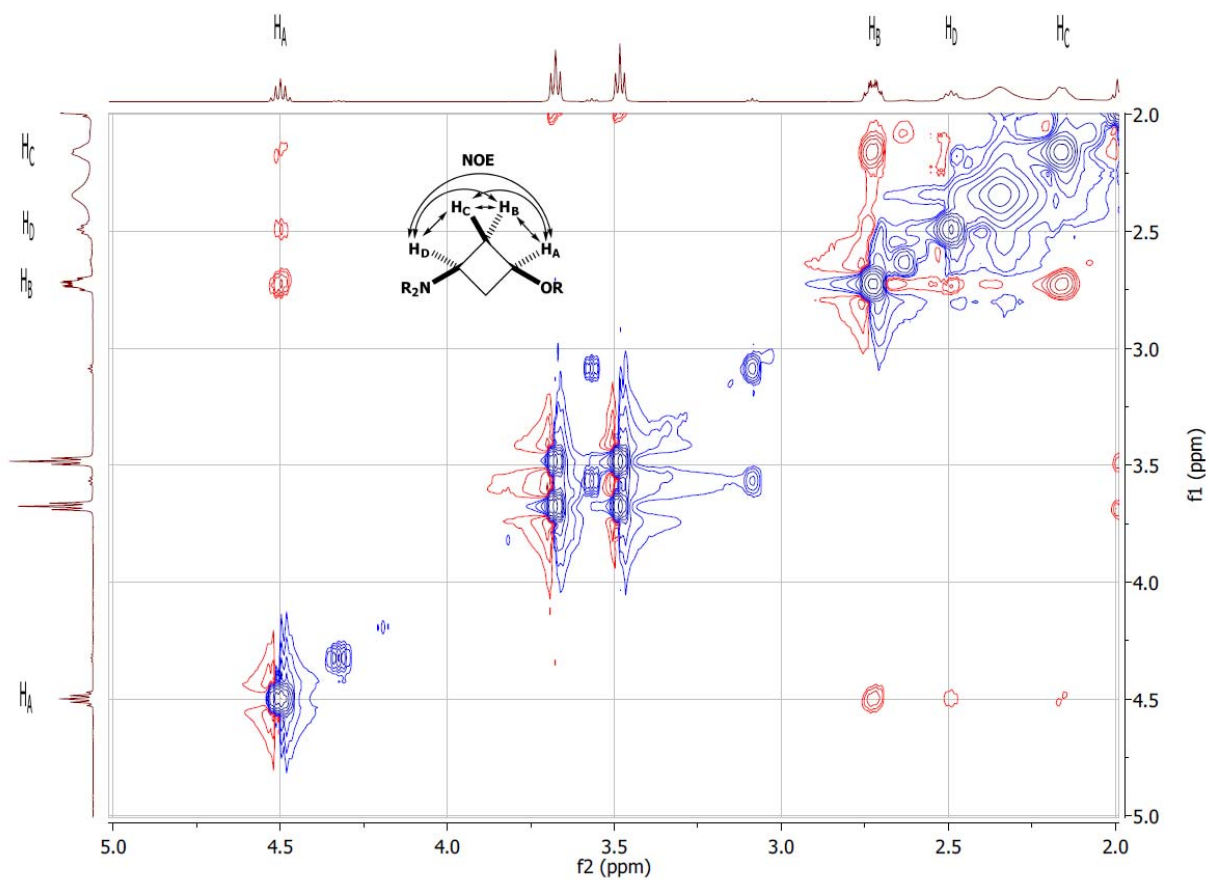

Figure S36: Characteristic section of a 500 MHz NOESY spectrum of compound 32 in CDCl<sub>3</sub>.



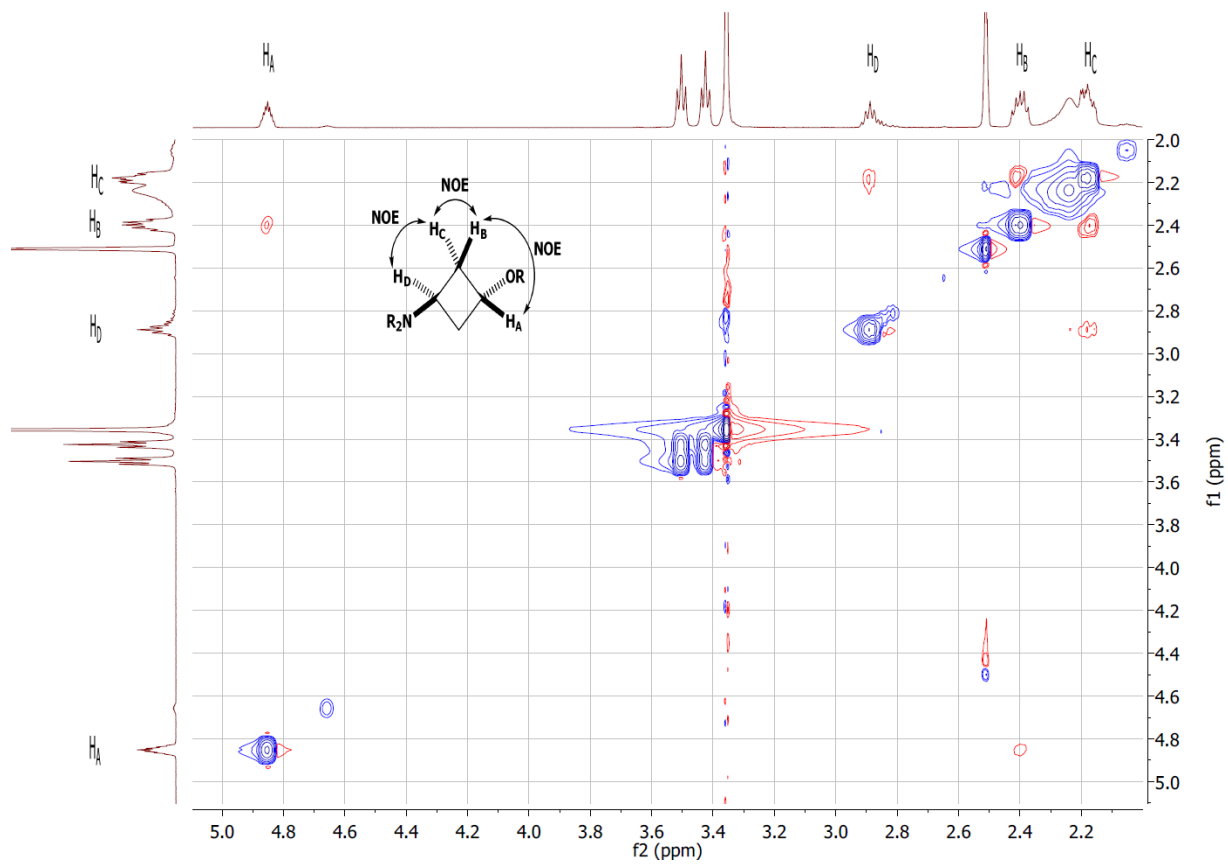

Figure S37: Characteristic section of a 500 MHz NOESY spectrum of compound 33 in DMSO-*d*<sub>6</sub>.

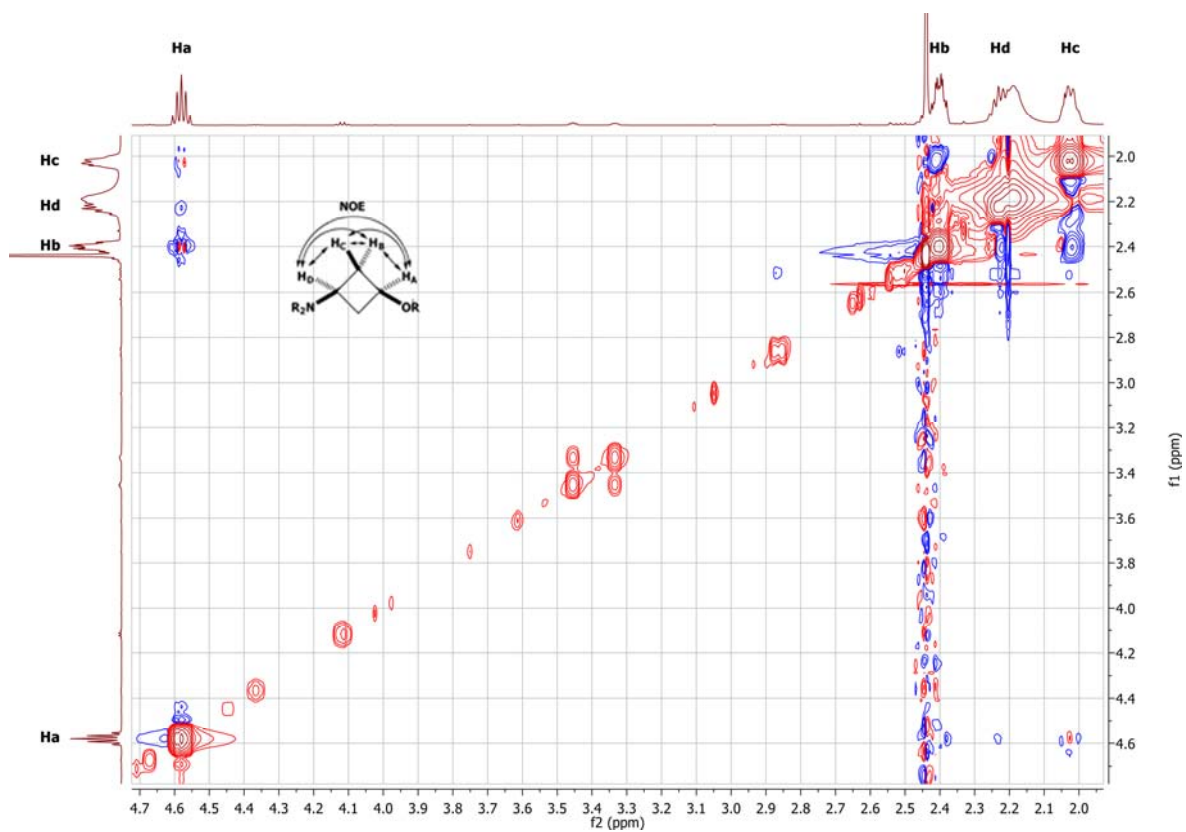

Figure S38: Characteristic section of a 600 MHz NOESY spectrum of compound 36 in CDCl<sub>3</sub>.

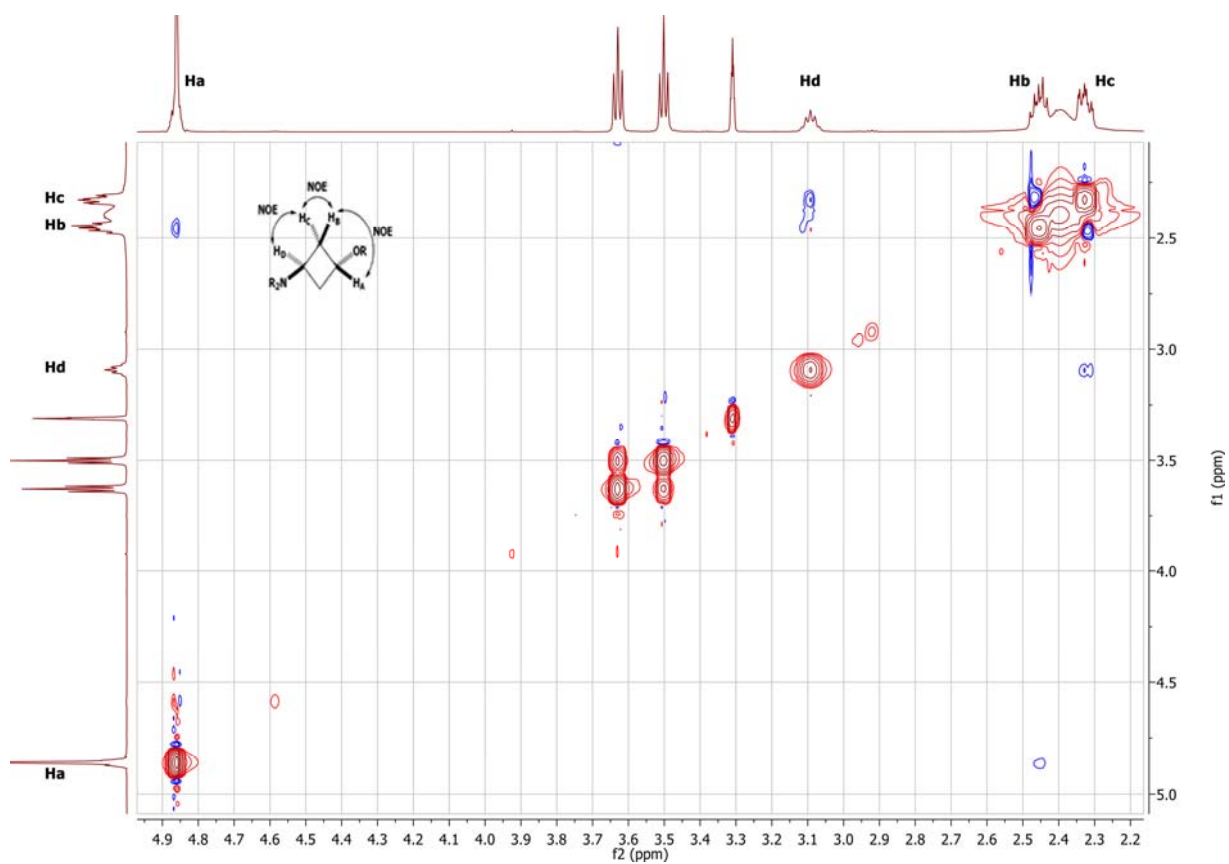

Figure S39: Characteristic section of a 600 MHz NOESY spectrum of compound 34 in CD<sub>3</sub>OD.

## Chemical procedures

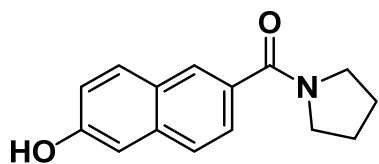

### (6-Hydroxynaphthalen-2-yl)(pyrrolidin-1-yl)methanone (**38**)

This procedure was based on a literature description.<sup>1</sup> To a stirred solution of 6-hydroxy-2-naphthoic acid (1.00 g, 5.31 mmol) in DMF (20 mL) was added DIPEA (3.71 mL, 21.3 mmol), pyrrolidine (0.527 mL, 6.38 mmol) and TBTU (2.05 g, 6.38 mmol). The solution was left to stir overnight at RT, after which the solution was diluted with H<sub>2</sub>O (50 mL). The mixture was extracted using EtOAc (3x40 mL). The combined organic phases were dried over Na<sub>2</sub>SO<sub>4</sub> and evaporated *in vacuo*. The resulting off-white solid was recrystallized from H<sub>2</sub>O: MeOH 9:1 to yield the product as white highly crystalline flakes (1.25 g, 98%). <sup>1</sup>H NMR (400 MHz, DMSO-*d*<sub>6</sub>) δ 9.93 (bs, 1H), 8.00 – 7.93 (m, 1H), 7.84 (d, *J* = 8.6 Hz, 1H), 7.70 (d, *J* = 8.5 Hz, 1H), 7.50 (dd, *J* = 8.5, 1.7 Hz, 1H), 7.18 – 7.08 (m, 2H), 3.56 – 3.42 (m, 4H), 1.96 – 1.73 (m, 4H). LC-MS: *t*<sub>R</sub> = 3.36 min, purity: > 99%, *M/z* [M+H]<sup>+</sup>: 242.

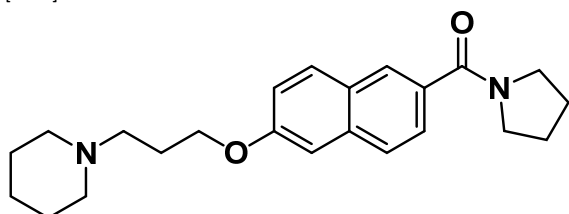

### (6-(3-(Piperidin-1-yl)propoxy)naphthalen-2-yl)(pyrrolidin-1-yl)methanone (**1**)

This procedure was based on a literature description.<sup>1</sup> To a stirred solution of di-*tert*-butylazodicarboxylate (954 mg, 4.14 mmol), PPh<sub>3</sub> (1.09 g, 4.14 mmol) and 3-(piperidin-1-yl)propan-1-ol (356 mg, 2.49 mmol) in THF (20 mL) was added **38** (500 mg, 2.07 mmol) after which the flask was flushed with nitrogen gas and sealed. The obtained solution was stirred for 5 days at RT. The reaction mixture was concentrated *in vacuo*. Et<sub>2</sub>O (20 mL) was added and the precipitated triphenylphosphine oxide was removed by filtration. After evaporation of Et<sub>2</sub>O the solids were recrystallized using H<sub>2</sub>O: MeOH 4:1. Addition of a few drops of H<sub>2</sub>O to the mother liquor gave a second crop of crystals. The combined crops yielded 752 mg (99%, 2.05 mmol) of highly crystalline white needles. <sup>1</sup>H NMR (500 MHz, CD<sub>3</sub>OD) δ 7.98 (d, *J* = 1.6 Hz, 1H), 7.83 (dd, *J* = 8.7, 5.5 Hz, 2H), 7.56 (dd, *J* = 8.5, 1.7 Hz, 1H), 7.28 (d, *J* = 2.4 Hz, 1H), 7.19 (dd, *J* = 9.0, 2.5 Hz, 1H), 4.15 (t, *J* = 6.1 Hz, 2H), 3.64 (t, *J* = 7.0 Hz, 2H), 3.55 (t, *J* = 6.7 Hz, 2H), 2.63 – 2.35 (m, 6H), 2.11 – 1.97 (m, 4H), 1.91 (p, *J* = 6.7 Hz, 2H), 1.64 (p, *J* = 5.7 Hz, 4H), 1.55 – 1.43 (m, 2H); <sup>13</sup>C NMR (126 MHz, CD<sub>3</sub>OD) δ 172.0, 159.6, 137.0, 132.8, 131.1, 129.3, 128.1, 128.0, 125.7, 120.9, 107.5, 67.5, 57.2, 55.5, 51.1, 47.6, 27.4, 27.3, 26.5, 25.4, 25.2; LC-MS: *t*<sub>R</sub> = 3.02 min, purity: >99%, *M/z* [M+H]<sup>+</sup>: 367; HRMS calcd. for C<sub>23</sub>H<sub>31</sub>N<sub>2</sub>O<sub>2</sub> [M+H]<sup>+</sup> = 367.2380, found 367.2376.

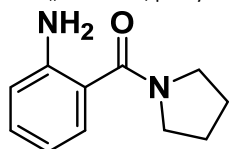

### (2-Aminophenyl)(pyrrolidin-1-yl)methanone (**5**)

To a stirred solution of **2** (1.63 g, 12.1 mmol) in DMF (9.82 mL) were added DIPEA (2.44 mL, 15.7 mmol), HOBt·H<sub>2</sub>O (1.23 g, 8.06 mmol), pyrrolidine (0.650 mL, 7.86 mmol) and EDCI·HCl (1.53 g, 7.98 mmol). The mixture was stirred overnight at RT, after which it was concentrated *in vacuo* and partitioned between DCM (40 mL) and H<sub>2</sub>O (40 mL). The aqueous phase was extracted with DCM (3x40 mL). The combined organic phases were dried over Na<sub>2</sub>SO<sub>4</sub> and evaporated *in vacuo*. The residue was purified via flash column chromatography using EtOAc: TEA 95:5 as eluent to yield the product as an off-white solid (1.21 g, 81%). <sup>1</sup>H NMR (400 MHz, CDCl<sub>3</sub>) δ 7.23 – 7.09 (m, 2H), 6.76 – 6.66 (m, 2H), 4.55 (bs, 2H), 3.63 (bs, 2H), 3.47 (bs, 2H), 2.15 – 1.64 (m, 4H); LC-MS: *t*<sub>R</sub> = 3.16 min, purity: >99%, *M/z* [M+H]<sup>+</sup> = 191.

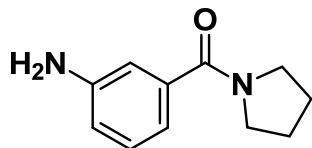

### (3-Aminophenyl)(pyrrolidin-1-yl)methanone (**6**)

To a stirred solution of **3** (1.09 g, 7.91 mmol) in DMF (6.5 mL) were added DIPEA (1.64 mL, 10.6 mmol), HOBt·H<sub>2</sub>O (0.808 g, 5.27 mmol), pyrrolidine (0.43 mL, 5.2 mmol) and EDCI·HCl (1.02 g, 5.32 mmol). The reaction mixture was stirred overnight at RT, after which H<sub>2</sub>O (30 mL) was added. The mixture was extracted using DCM (4x30 mL). The combined organic phases were dried over Na<sub>2</sub>SO<sub>4</sub>, evaporated *in vacuo* and coevaporated twice using toluene. The crude product was purified via flash column chromatography using EtOAc: TEA 95:5 as eluent to yield the product as an off-white solid (0.96 g, 95%). <sup>1</sup>H NMR (400 MHz, CDCl<sub>3</sub>) δ 7.14 (t, *J* = 7.7 Hz, 1H), 6.88 – 6.77 (m, 2H), 6.74 – 6.65 (m, 1H), 3.72

(bs, 2H), 3.60 (t,  $J = 7.0$  Hz, 2H), 3.40 (t,  $J = 6.6$  Hz, 2H), 2.00 – 1.88 (m, 2H), 1.84 (p,  $J = 6.4$  Hz, 2H); LC-MS:  $t_R = 2.42$  min, purity: >99%,  $M/z$   $[M+H]^+$ : 191.

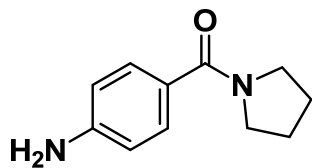

#### (4-Aminophenyl)(pyrrolidin-1-yl)methanone (7)

To a stirred solution of **4** (6.49 g, 47.3 mmol) in DMF (39.5 mL) were added DIPEA (9.76 mL, 56.0 mmol), HOBT.H<sub>2</sub>O (4.83 g, 31.6 mmol), pyrrolidine (2.61 mL, 31.6 mmol) and EDCI.HCl (6.05 g, 31.6 mmol). The solution was stirred overnight at RT, after which H<sub>2</sub>O (100 mL) was added. The mixture was extracted using DCM (3x100 mL). The combined organic phases were dried over Na<sub>2</sub>SO<sub>4</sub> and evaporated *in vacuo* to yield the product as a tan solid (5.06 g, 81%). <sup>1</sup>H NMR (250 MHz, CDCl<sub>3</sub>)  $\delta$  7.44 – 7.31 (m, 2H), 6.68 – 6.54 (m, 2H), 4.16 (bs, 2H), 3.72 – 3.39 (m, 4H), 2.05 – 1.71 (m, 4H); LC-MS:  $t_R = 2.54$  min, purity 96.19%,  $M/z$   $[M+H]^+$ : 191.

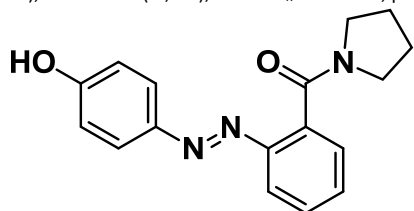

#### (E)-(2-((4-Hydroxyphenyl)diazenyl)phenyl)(pyrrolidin-1-yl)methanone (9)

Aniline **5** (0.644 g, 3.39 mmol) was dissolved in ice-cooled 1.0 M aq. HCl (8.46 mL, 8.46 mmol). NaNO<sub>2</sub> (0.234 g, 3.39 mmol) dissolved in H<sub>2</sub>O (3.6 mL) was added. After 5 min, phenol (1.59 g, 16.9 mmol) dissolved in 2.5 M aq. NaOH solution (8.40 mL, 21.0 mmol) was added at once. After 30 min, the mixture was acidified to pH 4 by means of a 3.0 M aq. HCl solution and aq. sat. NH<sub>4</sub>Cl. The collected precipitate was suspended in H<sub>2</sub>O (50 mL) and heated to 70 °C for 15 min, after which the solids were collected by hot filtration and washed with ice cold H<sub>2</sub>O. The product was an orange solid (605 mg, 61%). <sup>1</sup>H NMR (500 MHz, CDCl<sub>3</sub>)  $\delta$  7.83 – 7.78 (m, 1H), 7.67 – 7.61 (m, 2H), 7.54 – 7.42 (m, 3H), 6.93 – 6.87 (m, 2H), 3.71 (t,  $J = 7.1$  Hz, 2H), 3.13 (t,  $J = 6.8$  Hz, 2H), 1.93 (p,  $J = 6.8$  Hz, 2H), 1.81 (p,  $J = 6.7$  Hz, 2H); LC-MS:  $t_R = 4.03$  min, purity: 98.30%,  $M/z$   $[M+H]^+$ : 296.

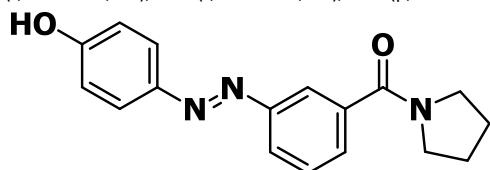

#### (E)-(3-((4-Hydroxyphenyl)diazenyl)phenyl)(pyrrolidin-1-yl)methanone (10)

Aniline **6** (0.634 g, 3.33 mmol) was dissolved in ice-cooled 1.0 M aq. HCl (8.33 mL, 8.33 mmol) solution. NaNO<sub>2</sub> (0.303 g, 4.39 mmol) dissolved in H<sub>2</sub>O (4.1 mL) was added and the mixture stirred for 5 min. Phenol (1.57 g, 16.7 mmol) dissolved in 2.50 M aq. NaOH (8.26 mL, 20.7 mmol) was added at once. After 30 min, the mixture was acidified to pH 4 by means of a 3.0 M aq. HCl solution and aq. sat. NH<sub>4</sub>Cl. The precipitate was collected and washed with ice cold H<sub>2</sub>O. The crude product was suspended in H<sub>2</sub>O and heated to 50 °C for 30 min. The solids were collected by hot filtration and washed with cold H<sub>2</sub>O. The product was obtained as orange crystals (0.646 g, 66%). <sup>1</sup>H NMR (400 MHz, CD<sub>3</sub>OD)  $\delta$  8.03 – 7.77 (m, 4H), 7.68 – 7.52 (m, 2H), 7.01 – 6.83 (m, 2H), 3.63 (t,  $J = 6.9$  Hz, 2H), 3.51 (t,  $J = 6.7$  Hz, 2H), 2.10 – 1.82 (m, 4H); LC-MS:  $t_R = 4.03$  min, purity: 96.49%,  $M/z$   $[M+H]^+$ : 296.

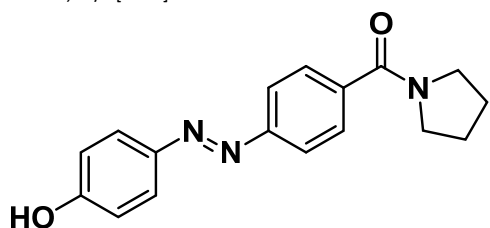

#### (E)-(4-((4-Hydroxyphenyl)diazenyl)phenyl)(pyrrolidin-1-yl)methanone (11)

Aniline **7** (1.41 g, 7.09 mmol) was dissolved in ice-cooled 1.0 M aq. HCl solution (17.7 mL, 17.7 mmol). NaNO<sub>2</sub> (0.646 g, 9.36 mmol) dissolved in H<sub>2</sub>O (3.20 mL) was added and the mixture was stirred for 5 min. Phenol (3.33 g, 35.4 mmol) dissolved in a 2.5 M aq. NaOH solution (17.6 mL, 44.0 mmol) and added in one portion. After 30 min, the mixture was acidified to pH 4 by means of a 3.0 M aq. HCl solution and aq. sat. NH<sub>4</sub>Cl. The precipitate was collected and washed with H<sub>2</sub>O (2x10 mL). The product was obtained as orange crystals (1.86 g, 81%). <sup>1</sup>H NMR (400 MHz, CD<sub>3</sub>OD)  $\delta$  7.95 – 7.80 (m, 4H), 7.72 – 7.60 (m, 2H), 6.97 – 6.87 (m, 2H), 3.62 (t,  $J = 6.9$  Hz, 2H), 3.52 (t,  $J = 6.6$  Hz, 2H), 2.02 (p,  $J = 6.4$  Hz, 2H), 1.93 (p,  $J = 6.1$  Hz, 2H); LC-MS:  $t_R = 3.97$  min, purity: 97.58%,  $M/z$   $[M+H]^+$ : 296.

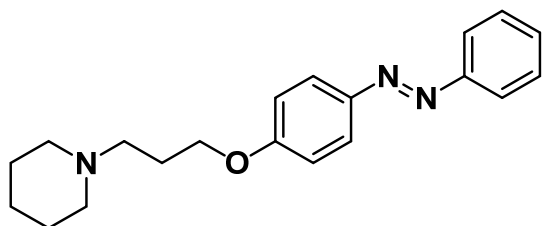

**(E)-1-(3-(4-(Phenyldiazenyl)phenoxy)propyl)piperidine (12)**

Phenol **8** (0.200 g, 1.01 mmol), 1-(3-chloropropyl)piperidine.HCl (0.172 g, 1.06 mmol), KI (0.019 g, 0.11 mmol) and  $K_2CO_3$  (0.450 g, 3.26 mmol) were added to DMF (6.3 mL). This mixture was stirred overnight at 60 °C, after which the reaction mixture was concentrated *in vacuo*. The residue was partitioned between DCM (40 mL) and  $H_2O$  (40 mL). The organic phase was washed with 2.5 M aq. NaOH solution (2x20 mL), dried over  $Na_2SO_4$  and evaporated *in vacuo*. The crude product was purified by flash column chromatography with a gradient of *n*-heptane: EtOAc: TEA 45:45:10 to EtOAc: TEA 90:10. This yielded the product as orange needles (0.22 g, 67%).  $^1H$  NMR (500 MHz,  $CDCl_3$ )  $\delta$  7.96 – 7.84 (m, 4H), 7.53 – 7.47 (m, 2H), 7.46 – 7.40 (m, 1H), 7.04 – 6.96 (m, 2H), 4.09 (t,  $J$  = 6.4 Hz, 2H), 2.50 (t,  $J$  = 7.3 Hz, 2H), 2.47 – 2.32 (m, 4H), 2.07 – 1.97 (m, 2H), 1.61 (p,  $J$  = 5.7 Hz, 4H), 1.51 – 1.39 (m, 2H);  $^{13}C$  NMR (126 MHz,  $CDCl_3$ )  $\delta$  161.7, 152.9, 147.0, 130.4, 129.1, 124.9, 122.7, 114.8, 67.0, 56.0, 54.8, 26.9, 26.1, 24.5; LC-MS:  $t_R$  = 3.70 min, purity: > 99%,  $M/z$   $[M+H]^+$ : 324, An injection peak is visible below 1.0 min; HRMS calcd. for  $C_{20}H_{26}N_3O$   $[M+H]^+$  = 324.2070, found 324.2082.

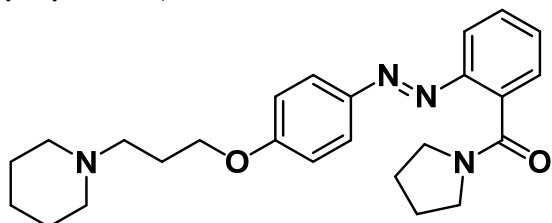

**(E)-2-((4-(3-(Piperidin-1-yl)propoxy)phenyl)diazenyl)phenyl)(pyrrolidin-1-yl)methanone (13)**

Phenol **9** (0.300 g, 0.995 mmol), 1-(3-chloropropyl)piperidine.HCl (0.194 g, 1.20 mmol), KI (0.017 g, 0.10 mmol) and  $K_2CO_3$  (0.413 g, 2.99 mmol) were added to DMF (5.93 mL). The mixture was stirred at overnight at 60 °C after which the solvent was evaporated *in vacuo*. The residue was partitioned between DCM (20 mL) and  $H_2O$  (20 mL). The organic phase was washed with  $H_2O$  (20 mL) and 2.5 M aq. NaOH solution (4x 20 mL), dried over  $Na_2SO_4$  and evaporated *in vacuo*. The crude product was purified by means of flash column chromatography using a gradient from *n*-heptane: EtOAc: TEA 10:9:1 to EtOAc: TEA 9:1. This yielded the product as orange crystals (0.28 g, 66%).  $^1H$  NMR (400 MHz,  $CDCl_3$ )  $\delta$  7.89 – 7.75 (m, 3H), 7.52 – 7.43 (m, 3H), 7.02 – 6.92 (m, 2H), 4.09 (t,  $J$  = 6.4 Hz, 2H), 3.71 (t,  $J$  = 7.0 Hz, 2H), 3.07 (t,  $J$  = 6.7 Hz, 2H), 2.55 – 2.31 (m, 6H), 2.02 (p,  $J$  = 6.7 Hz, 2H), 1.91 (p,  $J$  = 6.8 Hz, 2H), 1.78 (p,  $J$  = 6.8 Hz, 2H), 1.61 (p,  $J$  = 5.6 Hz, 4H), 1.51 – 1.38 (m, 2H);  $^{13}C$  NMR (101 MHz,  $CDCl_3$ )  $\delta$  168.8, 162.1, 148.3, 147.0, 136.4, 130.7, 129.7, 127.5, 125.1, 118.1, 114.9, 67.0, 56.0, 54.8, 48.4, 45.7, 26.9, 26.1, 26.0, 24.9, 24.5; LC-MS:  $t_R$  = 3.72 min, purity: >99%,  $M/z$   $[M+H]^+$ : 421; HRMS calcd. for  $C_{25}H_{33}N_4O_2$   $[M+H]^+$  = 421.2598, found 421.2619.

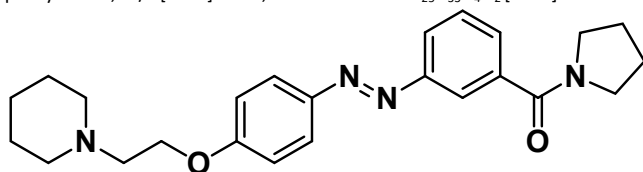

**(E)-3-((4-(2-(Piperidin-1-yl)ethoxy)phenyl)diazenyl)phenyl)(pyrrolidin-1-yl)methanone (14)**

Phenol **10** (0.141 g, 0.477 mmol), 1-(2-chloroethyl)piperidine.HCl (0.087 g, 0.59 mmol), KI (0.011 g, 0.066 mmol) and  $K_2CO_3$  (0.211 g, 1.53 mmol) were added to DMF (3.0 mL). The obtained mixture was stirred overnight at 60 °C, after which the solvent was evaporated *in vacuo*. The residue was partitioned between DCM (20 mL) and  $H_2O$  (20 mL). The organic phase was washed with  $H_2O$  (20 mL) and 2.5 M aq. NaOH (2x 20 mL), dried over  $Na_2SO_4$ , and evaporated *in vacuo*. The residue was recrystallized from *n*-heptane: EtOH 10:1 to yield the product as orange crystals (63 mg, 33%).  $^1H$  NMR (400 MHz,  $CDCl_3$ )  $\delta$  8.04 – 8.00 (m, 1H), 7.95 – 7.87 (m, 3H), 7.63 – 7.57 (m, 1H), 7.53 (t,  $J$  = 7.7 Hz, 1H), 7.05 – 6.99 (m, 2H), 4.20 (t,  $J$  = 6.0 Hz, 2H), 3.68 (t,  $J$  = 7.0 Hz, 2H), 3.49 (t,  $J$  = 6.6 Hz, 2H), 2.83 (t,  $J$  = 6.0 Hz, 2H), 2.63 – 2.45 (m, 4H), 1.98 (p,  $J$  = 6.8 Hz, 2H), 1.89 (p,  $J$  = 6.8 Hz, 2H), 1.63 (p,  $J$  = 5.6 Hz, 4H), 1.50 – 1.39 (m, 2H);  $^{13}C$  NMR (101 MHz,  $CDCl_3$ )  $\delta$  169.2, 161.7, 152.5, 147.0, 138.2, 129.3, 129.0, 125.0, 124.3, 121.0, 115.0, 66.4, 57.9, 55.2, 49.8, 46.4, 26.5, 26.0, 24.6, 24.2; LC-MS:  $t_R$  = 3.63 min, purity: >99%,  $M/z$   $[M+H]^+$ : 407; HRMS calcd. for  $C_{24}H_{31}N_4O_2$   $[M+H]^+$  = 407.2442, found 407.2453.

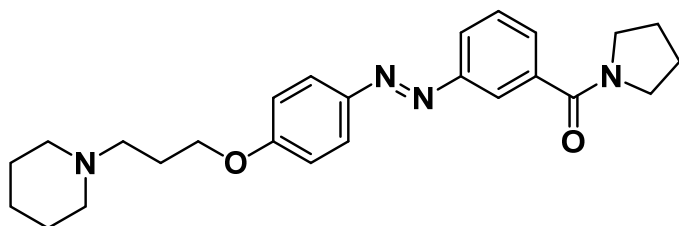

**(E)-3-((4-(3-(Piperidin-1-yl)propoxy)phenyl)diazenyl)phenyl)(pyrrolidin-1-yl)methanone (15)**

Phenol **10** (0.149 g, 0.505 mmol), 1-(3-chloropropyl)piperidine.HCl (0.099 g, 0.61 mmol), KI (8.0 mg, 0.048 mmol) and  $K_2CO_3$  (0.210 g, 1.52 mmol) were added to DMF (3.0 mL). The mixture was stirred overnight at 60 °C, after which it was concentrated *in vacuo*. DCM (20 mL) and  $H_2O$  (20 mL) were added and the layers were partitioned. The organic phase was washed using 2.5 M NaOH (2x20 mL), dried over  $Na_2SO_4$  and evaporated *in vacuo*. The residue was recrystallized from *n*-heptane: EtOH 10:1 to yield the product as orange crystals (0.10 g, 48%).  $^1H$  NMR (400 MHz,  $CDCl_3$ )  $\delta$  8.05 – 7.99 (m, 1H), 7.96 – 7.86 (m, 3H), 7.60 (d,  $J$  = 7.6 Hz, 1H), 7.53 (t,  $J$  = 7.7 Hz, 1H), 7.04 – 6.96 (m, 2H), 4.10 (t,  $J$  = 6.3 Hz, 2H), 3.68 (t,  $J$  = 6.9 Hz, 2H), 3.49 (t,  $J$  = 6.6 Hz, 2H), 2.63 – 2.30 (m, 6H), 2.10 – 1.94 (m, 4H), 1.89 (p,  $J$  = 6.7 Hz, 2H), 1.62 (p,  $J$  = 5.6 Hz, 4H), 1.51 – 1.38 (m, 2H);  $^{13}C$  NMR (101 MHz,  $CDCl_3$ )  $\delta$  169.2, 162.0, 152.6, 146.9, 138.3, 129.3, 129.0, 125.1, 124.3, 121.0, 114.9, 67.0, 56.0, 54.8, 49.8, 46.4, 26.8, 26.6, 26.0, 24.6, 24.5; LC-MS:  $t_R$  = 3.33 min, purity: >99%,  $M/z$  [ $M+H$ ] $^+$ : 421; HRMS calcd. for  $C_{25}H_{33}N_4O_2$  [ $M+H$ ] $^+$  = 421.2598, found 421.2606.

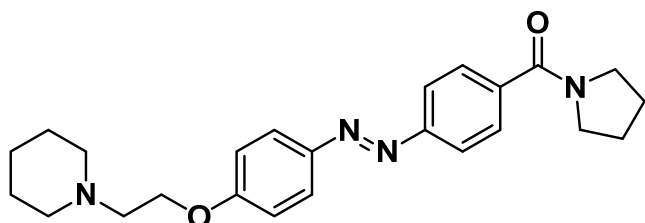

**(E)-4-((4-(2-(Piperidin-1-yl)ethoxy)phenyl)diazenyl)phenyl)(pyrrolidin-1-yl)methanone (16)**

Phenol **11** (0.145 g, 0.491 mmol), 1-(2-chloroethyl)piperidine.HCl (0.086 g, 0.58 mmol), KI (0.011 g, 0.066 mmol) and  $K_2CO_3$  (0.218 g, 1.58 mmol) were added in DMF (3.0 mL). The mixture was stirred at 60 °C for 16 hours, after which the solvent was evaporated *in vacuo*. DCM (20 mL) and  $H_2O$  (20 mL) were added to the residue. The organic phase was washed using 2.5 M NaOH solution (2x20 mL), dried over  $Na_2SO_4$  and evaporated *in vacuo*. The crude product was recrystallized from *n*-heptane: EtOH 20:1 to yield the product as orange crystals (38 mg, 19%).  $^1H$  NMR (400 MHz,  $DMSO-d_6$ )  $\delta$  7.95 – 7.87 (m, 4H), 7.68 – 7.60 (m, 2H), 7.20 – 7.12 (m, 2H), 4.19 (t,  $J$  = 5.8 Hz, 2H), 3.50 (t,  $J$  = 6.8 Hz, 2H), 3.42 (t,  $J$  = 6.4 Hz, 2H), 2.71 (bs, 2H), 2.46 (bs, 4H), 1.94 – 1.77 (m, 4H), 1.51 (p,  $J$  = 5.5 Hz, 4H), 1.43 – 1.33 (m, 2H);  $^{13}C$  NMR (126 MHz,  $CDCl_3$ )  $\delta$  169.2, 161.7, 153.4, 147.1, 138.8, 128.2, 125.1, 122.5, 115.0, 66.4, 57.9, 55.2, 49.7, 46.4, 26.6, 26.0, 24.6, 24.2; LC-MS:  $t_R$  = 4.28 min, purity: >99%,  $M/z$  [ $M+H$ ] $^+$  = 407; HRMS calcd. for  $C_{24}H_{31}N_4O_2$  [ $M+H$ ] $^+$  = 407.2442, found 407.2424.

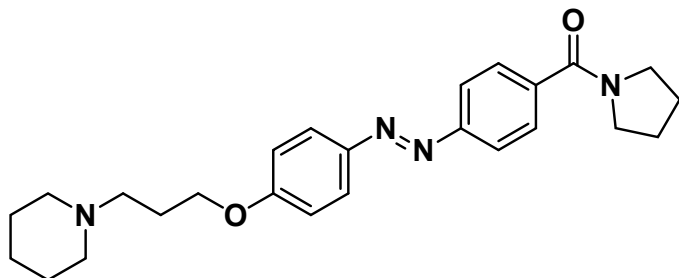

**(E)-4-((4-(3-(Piperidin-1-yl)propoxy)phenyl)diazenyl)phenyl)(pyrrolidin-1-yl)methanone (17)**

Phenol **11** (0.145 g, 0.491 mmol), 1-(3-chloropropyl)piperidine. HCl (0.096 g, 0.59 mmol), KI (0.010 g, 0.060 mmol) and  $K_2CO_3$  (0.237 g, 1.72 mmol) were added to DMF (3.0 mL). The mixture was stirred overnight at 60 °C. The solvent was evaporated *in vacuo*, after which the crude was partitioned between DCM (20 mL) and  $H_2O$  (20 mL). The organic phase was washed using 2.5 M aq. NaOH solution (2x20 mL), dried over  $Na_2SO_4$  and evaporated *in vacuo*. The crude product was recrystallized from EtOAc to yield the product as orange crystals (80 mg, 39%).  $^1H$  NMR (500 MHz,  $CDCl_3$ )  $\delta$  7.95 – 7.85 (m, 4H), 7.69 – 7.62 (m, 2H), 7.05 – 6.97 (m, 2H), 4.11 (t,  $J$  = 6.3 Hz, 2H), 3.67 (t,  $J$  = 7.0 Hz, 2H), 3.46 (t,  $J$  = 6.6 Hz, 2H), 2.74 – 2.29 (m, 4H), 2.21 – 2.02 (m, 2H), 2.02 – 1.94 (m, 2H), 1.94 – 1.84 (m, 2H), 1.82 – 1.31 (m, 8H);  $^{13}C$  NMR (101 MHz,  $CDCl_3$ )  $\delta$  169.2, 162.1, 153.5, 147.0, 138.7, 128.2, 125.1, 122.5, 114.9, 67.0, 56.0, 54.8, 49.7, 46.4, 26.8, 26.6, 26.1, 24.6, 24.5; LC-MS:  $t_R$  = 3.98 min, purity >99%,  $M/z$  [ $M+H$ ] $^+$ : 421; HRMS:  $C_{25}H_{33}N_4O_2$   $M/z$  calc. 421.2598,  $M/z$  found. 421.2593.

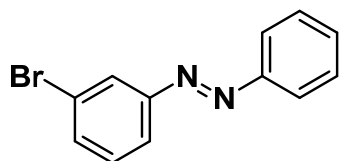

**(E)-1-(3-Bromophenyl)-2-phenyldiazene (20)**

To a stirred solution of nitrosobenzene (1.89 g, 17.6 mmol) in glacial AcOH (20 mL) was added aniline **18** (1.92 mL, 17.6 mmol). The solution was heated to 80 °C and stirred for 7 hours. The reaction mixture was added to toluene (50 mL). The organic phase was washed with 1.0 M aq. H<sub>2</sub>SO<sub>4</sub> solution (50 mL) and 1% aq. NaOH solution (50 mL), dried over Na<sub>2</sub>SO<sub>4</sub> and evaporated *in vacuo*. The crude product was subjected to flash column chromatography using *n*-heptane as eluent to afford the product as a sticky orange oil (1.91 g, 42%). <sup>1</sup>H NMR (250 MHz, CDCl<sub>3</sub>) δ 8.09 – 8.03 (m, 1H), 7.98 – 7.83 (m, 3H), 7.64 – 7.48 (m, 4H), 7.46 – 7.34 (m, 1H); LC-MS: t<sub>R</sub> = 5.99 min, purity: > 99%, M/z [M+H]<sup>+</sup>: 261 (<sup>79</sup>Br) + 263 (<sup>81</sup>Br).

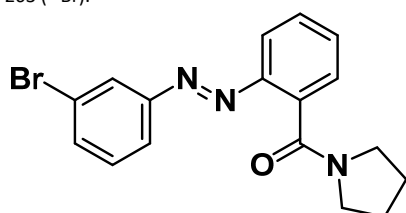

**(E)-(2-((3-Bromophenyl)diazenyl)phenyl)(pyrrolidin-1-yl)methanone (21)**

Aniline **18** (0.316 mL, 2.91 mmol) was dissolved in DCM (10 mL). Oxone™ (3.57 g, 5.81 mmol) was added as a solution in H<sub>2</sub>O (40 mL). The biphasic mixture was stirred vigorously at RT. After 3 hours, the layers were partitioned and the organic phase was washed with 1.0 M aq. HCl (10 mL), aq. sat. NaHCO<sub>3</sub> (10 mL) and transferred to a round bottomed flask. Aniline **5** (503 mg, 2.64 mmol) and AcOH (10 mL) were added and the solution was stirred overnight at RT. The solution was evaporated *in vacuo* after which EtOAc (20 mL) was added. The organic phase was washed with aq. sat. NaHCO<sub>3</sub> (2x20 mL), dried over Na<sub>2</sub>SO<sub>4</sub> and evaporated *in vacuo*. The crude product was subjected to flash column chromatography using *n*-heptane: EtOAc 9:1 as eluent to yield the product as an orange viscous oil (622 mg, 66%). <sup>1</sup>H NMR (400 MHz, CDCl<sub>3</sub>) δ 7.98 – 7.93 (m, 1H), 7.86 – 7.79 (m, 2H), 7.63 – 7.57 (m, 1H), 7.57 – 7.47 (m, 3H), 7.39 (t, *J* = 7.9 Hz, 1H), 3.74 (t, *J* = 7.0 Hz, 2H), 3.09 (t, *J* = 6.7 Hz, 2H), 1.95 (p, *J* = 6.9 Hz, 2H), 1.82 (p, *J* = 6.7 Hz, 2H); LRMS: M/z [M+H]<sup>+</sup>: 358 (<sup>79</sup>Br) + 360 (<sup>81</sup>Br).

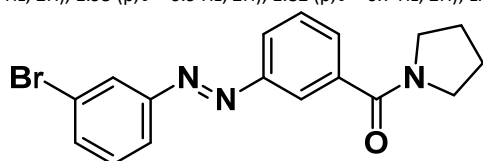

**(E)-(3-((3-Bromophenyl)diazenyl)phenyl)(pyrrolidin-1-yl)methanone (22)**

Aniline **18** (0.285 mL, 2.69 mmol) was dissolved in DCM (9.00 mL). Oxone™ (3.31 g, 5.38 mmol) was added as a solution in H<sub>2</sub>O (36.0 mL). The biphasic mixture was stirred vigorously at RT. After 2.5 hours, the layers were partitioned and the organic phase was washed with 1.0 M aq. HCl (5 mL), aq. sat. NaHCO<sub>3</sub> (5 mL), brine (5 mL) and transferred to a round bottomed flask. Aniline **6** (0.511 g, 2.69 mmol) and AcOH (13.4 mL) were added and the solution was stirred overnight at RT. The solution was evaporated *in vacuo* after which EtOAc (40 mL) was added. The organic phase was washed with aq. sat. NaHCO<sub>3</sub> (2x40 mL) and brine (20 mL), dried over Na<sub>2</sub>SO<sub>4</sub> and evaporated *in vacuo*. The crude product was subjected to flash column chromatography using a gradient from *n*-heptane: EtOAc: TEA 80:20:1 to *n*-heptane: EtOAc: TEA 10:90:1 to yield the product as an orange viscous oil (472 mg, 49%). <sup>1</sup>H NMR (400 MHz, CDCl<sub>3</sub>) δ 8.10 – 8.02 (m, 2H), 7.97 (dt, *J* = 7.9, 1.6 Hz, 1H), 7.88 (dt, *J* = 7.9, 1.3 Hz, 1H), 7.67 (dt, *J* = 7.6, 1.5 Hz, 1H), 7.65 – 7.52 (m, 2H), 7.41 (t, *J* = 7.9 Hz, 1H), 3.69 (t, *J* = 6.9 Hz, 2H), 3.49 (t, *J* = 6.6 Hz, 2H), 2.06 – 1.85 (m, 4H); LC-MS: t<sub>R</sub> = 5.47 min, purity: 95.81%, M/z [M+H]<sup>+</sup>: 358 (<sup>79</sup>Br) + 360 (<sup>81</sup>Br).

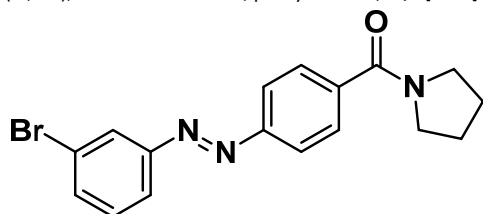

**(E)-(4-((3-Bromophenyl)diazenyl)phenyl)(pyrrolidin-1-yl)methanone (23)**

Aniline **18** (0.570 mL, 5.38 mmol) was dissolved in DCM (9.00 mL). Oxone™ (6.61 g, 10.8 mmol) was added as a solution in H<sub>2</sub>O (36.0 mL). The biphasic mixture was stirred vigorously at RT. After 3 hours, the layers were partitioned and the organic phase was washed with 1.0 M aq. HCl (5 mL), aq. sat. NaHCO<sub>3</sub> (5 mL), brine (5 mL) and transferred to a round bottomed flask. Aniline **7** (0.516 g, 2.71 mmol) and AcOH (13.6 mL) were added and the solution was stirred overnight at RT. The solution was evaporated *in vacuo* after which EtOAc (40 mL) was added. The organic phase was washed with aq. sat. NaHCO<sub>3</sub> (2x40 mL) and brine (20 mL), dried over Na<sub>2</sub>SO<sub>4</sub> and evaporated *in vacuo*. The crude product was subjected to flash column chromatography using a gradient from *n*-heptane: EtOAc: TEA 80:20:1 to *n*-heptane: EtOAc: TEA 10:90:1 to yield the



product as an orange solid (718 mg, 74%). <sup>1</sup>H NMR (400 MHz, CDCl<sub>3</sub>) δ 8.07 (t, *J* = 1.9 Hz, 1H), 7.97 – 7.92 (m, 2H), 7.92 – 7.87 (m, 1H), 7.71 – 7.65 (m, 2H), 7.64 – 7.60 (m, 1H), 7.42 (t, *J* = 7.9 Hz, 1H), 3.76 – 3.61 (m, 2H), 3.55 – 3.40 (m, 2H), 2.06 – 1.85 (m, 4H); LC-MS: *t*<sub>R</sub> = 5.55 min, purity: 97.56%, *M/z* [M+H]<sup>+</sup> = 358 (<sup>79</sup>Br) + 360 (<sup>81</sup>Br).

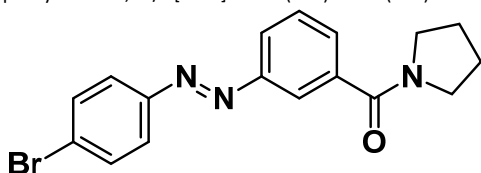

**(E)-3-((4-Bromophenyl)diazenyl)phenyl(pyrrolidin-1-yl)methanone (24)**

To a stirred solution of aniline **19** (0.482 g, 2.80 mmol) in DCM (9.33 mL) was added OXONE™ (3.45 g, 5.60 mmol) in H<sub>2</sub>O (37.3 mL). The obtained biphasic solution was stirred vigorously. After 4 hours, the layers were partitioned and the aqueous phase was extracted using DCM (2x20 mL). The combined organic phases were washed using 1.0 M aq. HCl (25 mL) and brine (25 mL), dried over Na<sub>2</sub>SO<sub>4</sub> and concentrated to a volume of about 5 mL. The concentrate was added to a solution of AcOH (9.3 mL) and aniline **6** (0.350 g, 1.84 mmol). The mixture was stirred at RT overnight. The volatiles were evaporated *in vacuo* and the residue was taken up in EtOAc. The mixture was washed with aq. sat. NaHCO<sub>3</sub> (2x20 mL) and brine (20 mL), dried over Na<sub>2</sub>SO<sub>4</sub> and evaporated *in vacuo*. The remaining oil was subjected to flash column chromatography with a gradient from EtOAc: *n*-heptane 1:1 to EtOAc: *n*-heptane 9:1 to yield the product as an orange powder (480 mg, 73%). <sup>1</sup>H NMR (500 MHz, CDCl<sub>3</sub>) δ 8.06 (t, *J* = 1.9 Hz, 1H), 7.99 – 7.93 (m, 1H), 7.84 – 7.76 (m, 2H), 7.69 – 7.61 (m, 3H), 7.56 (t, *J* = 7.7 Hz, 1H), 3.80 – 3.58 (m, 2H), 3.58 – 3.37 (m, 2H), 2.10 – 1.94 (m, 2H), 1.94 – 1.83 (m, 2H); LC-MS: *t*<sub>R</sub> = 5.50 min, purity: 97.16%, *M/z* [M+H]<sup>+</sup>: 358 (<sup>79</sup>Br) + 360 (<sup>81</sup>Br).

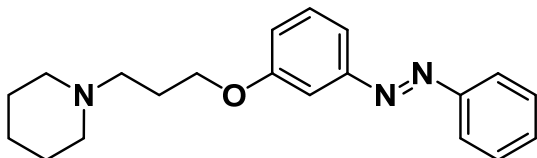

**(E)-1-(3-(3-(Phenyldiazenyl)phenoxy)propyl)piperidine (25)**

Cs<sub>2</sub>CO<sub>3</sub> (484 mg, 1.49 mmol) was added to an oven-dried microwave tube and flame-dried under vacuum. Catalyst [PdCl(C<sub>3</sub>H<sub>5</sub>)<sub>2</sub>] (18 mg, 0.048 mmol) and Rockphos™ (53.8 mg, 0.115 mmol) were added. The tube was evacuated and backfilled with nitrogen three times. Bromide **20** (250 mg, 0.957 mmol) was dissolved in toluene (957 μL) and this solution was added to the reaction vial via a syringe. Then, 3-(piperidin-1-yl)propan-1-ol (286 μL, 1.91 mmol) was added via a syringe. The tube was heated in a sand bath at 90 °C for 72 hours. The mixture was cooled to RT, filtered over Celite® and the filter cake was washed with THF. The solvent was evaporated *in vacuo* and the residue was subjected to flash column chromatography using a gradient from *n*-heptane: EtOAc: TEA 95:95:10 to EtOAc: TEA 95:5 followed by reverse phase LC purification with a gradient from H<sub>2</sub>O: ACN: formic acid 95:5:1 to H<sub>2</sub>O: ACN: formic acid 5:95:1. This yielded the product as an orange oil (62 mg, 20%). <sup>1</sup>H NMR (500 MHz, DMSO-*d*<sub>6</sub>) δ 7.93 – 7.86 (m, 2H), 7.65 – 7.54 (m, 3H), 7.54 – 7.47 (m, 2H), 7.42 – 7.37 (m, 1H), 7.17 – 7.08 (m, 1H), 4.10 (t, *J* = 6.4 Hz, 2H), 2.39 (t, *J* = 7.1 Hz, 2H), 2.37 – 2.24 (m, 4H), 1.89 (p, *J* = 6.7 Hz, 2H), 1.49 (p, *J* = 5.6 Hz, 4H), 1.41 – 1.33 (m, 2H); <sup>13</sup>C NMR (126 MHz, DMSO-*d*<sub>6</sub>) δ 159.5, 153.1, 151.8, 131.6, 130.3, 129.5, 122.6, 118.3, 116.4, 106.3, 66.3, 55.1, 54.2, 26.3, 25.6, 24.2; LC-MS: *cis*-**25**: *t*<sub>R</sub> = 3.59 min, purity: 3.91%, *M/z* [M+H]<sup>+</sup>: 324; *trans*-**25**: *t*<sub>R</sub> = 4.39 min, purity: 96.09%, *M/z* [M+H]<sup>+</sup>: 324; HRMS calcd. for C<sub>20</sub>H<sub>26</sub>N<sub>3</sub>O [M+H]<sup>+</sup> = 324.2070, found 324.2066.

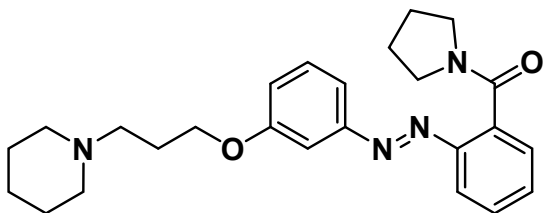

**(E)-2-((3-(3-(Piperidin-1-yl)propoxy)phenyl)diazenyl)phenyl(pyrrolidin-1-yl)methanone (26)**

Cs<sub>2</sub>CO<sub>3</sub> (635 mg, 1.95 mmol) was added to an oven-dried microwave vial and flame-dried under vacuum. Catalyst [(C<sub>3</sub>H<sub>5</sub>)PdCl]<sub>2</sub> (23 mg, 0.063 mmol) and Rockphos (70.7 mg, 0.151 mmol) were added. The tube was evacuated and backfilled three times with nitrogen. Bromide **21** (450 mg, 1.26 mmol) was dissolved in toluene (1.26 mL) and this solution was added to the reaction vial via a syringe. Then, 3-(piperidin-1-yl)propan-1-ol (375 μL, 2.51 mmol) was added via a syringe. The tube was heated in a sand bath at 90 °C for 72 hours. The mixture was cooled to RT, filtered over Celite® and the filter cake was washed with THF (10 mL). The solvent was evaporated *in vacuo* and the residue was subjected to flash column chromatography using a gradient from *n*-heptane: EtOAc: TEA 95:95:10 to EtOAc: TEA 95:5 followed by reverse phase column chromatography using a gradient for H<sub>2</sub>O: ACN: formic acid 95:5:1 to H<sub>2</sub>O: ACN: formic acid 5:95:1. The product was obtained as an orange powder (62 mg, 12%). <sup>1</sup>H NMR (500 MHz, DMSO-*d*<sub>6</sub>) δ 7.82 – 7.75 (m, 1H), 7.66 – 7.56 (m, 2H), 7.56 – 7.43 (m, 3H), 7.26 (t, *J* = 2.1 Hz, 1H), 7.18 – 7.13 (m, 1H), 4.06 (t, *J* = 6.5 Hz, 2H), 3.53 (t, *J* = 7.0 Hz, 2H), 3.02 (t, *J* = 6.7 Hz, 2H), 2.45 – 2.22 (m, 6H), 1.96 – 1.80 (m, 4H), 1.76 (p, *J* = 6.7 Hz, 2H), 1.49 (p, *J* = 5.6 Hz, 4H), 1.42 – 1.33 (m, 2H); <sup>13</sup>C NMR (126 MHz, DMSO-*d*<sub>6</sub>) δ 166.9, 159.5, 153.1, 147.2, 136.9, 131.9, 130.5, 129.7, 127.5, 119.0, 117.5, 117.3, 105.2, 66.2, 55.1, 54.2, 47.8, 45.3, 26.2, 25.6, 25.6, 24.3, 24.2; LC-MS: *t*<sub>R</sub> = 3.60 min, purity: 93.94%, *M/z* [M+H]<sup>+</sup>: 421; HRMS calcd. for C<sub>25</sub>H<sub>33</sub>N<sub>4</sub>O<sub>2</sub> [M+H]<sup>+</sup> = 421.2598, found 421.2593.

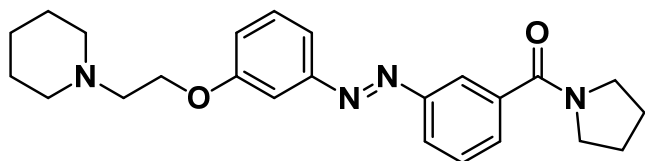

**(E)-3-((3-(2-(Piperidin-1-yl)ethoxy)phenyl)diazenyl)phenyl)(pyrrolidin-1-yl)methanone (27)**

$\text{Cs}_2\text{CO}_3$  (423 mg, 1.30 mmol) was added to an oven-dried microwave vial and flame-dried under vacuum. Catalyst  $[(\text{C}_3\text{H}_5)\text{PdCl}]_2$  (15 mg, 0.042 mmol) and Rockphos (47.1 mg, 0.100 mmol) were added. The tube was evacuated and backfilled three times with nitrogen. Bromide **22** (300 mg, 0.837 mmol) was dissolved in toluene (837  $\mu\text{L}$ ) and this solution was added to the reaction vial via a syringe. Then, 2-(piperidin-1-yl)ethanol (222  $\mu\text{L}$ , 1.67 mmol) was added via a syringe. The tube was heated in a sand bath at 90  $^\circ\text{C}$  for 72 hours. The mixture was cooled to RT, filtered over Celite<sup>®</sup> and the filter cake was washed with THF (10 mL). The solvent was evaporated *in vacuo* and the residue was subjected to flash column chromatography using a gradient from *n*-heptane: EtOAc: TEA 95:95:10 to EtOAc: TEA 95:5 to yield the product as orange crystals (0.16 g, 47%).  $^1\text{H}$  NMR (500 MHz,  $\text{DMSO}-d_6$ )  $\delta$  8.01 – 7.94 (m, 2H), 7.74 – 7.69 (m, 1H), 7.66 (t,  $J$  = 7.6 Hz, 1H), 7.56 – 7.47 (m, 2H), 7.44 (t,  $J$  = 2.0 Hz, 1H), 7.17 (dt,  $J$  = 7.5, 2.0 Hz, 1H), 4.16 (t,  $J$  = 5.8 Hz, 2H), 3.50 (t,  $J$  = 6.9 Hz, 2H), 3.42 (t,  $J$  = 6.5 Hz, 2H), 2.68 (t,  $J$  = 5.9 Hz, 2H), 2.48 – 2.35 (m, 4H), 1.94 – 1.77 (m, 4H), 1.49 (p,  $J$  = 5.6 Hz, 4H), 1.41 – 1.33 (m, 2H);  $^{13}\text{C}$  NMR (126 MHz,  $\text{DMSO}-d_6$ )  $\delta$  167.3, 159.4, 153.1, 151.5, 138.5, 130.3, 129.9, 129.6, 124.2, 120.5, 118.6, 116.5, 106.7, 66.0, 57.4, 54.4, 49.0, 46.0, 26.0, 25.6, 24.0 (2 overlapping carbon signal according to HSQC); LC-MS:  $t_{\text{R}}$  = 3.26 min, purity: 96.19%,  $M/z$   $[\text{M}+\text{H}]^+$ : 407; HRMS calcd. for  $\text{C}_{24}\text{H}_{31}\text{N}_4\text{O}_2$   $[\text{M}+\text{H}]^+$  = 407.2442, found 407.2434.

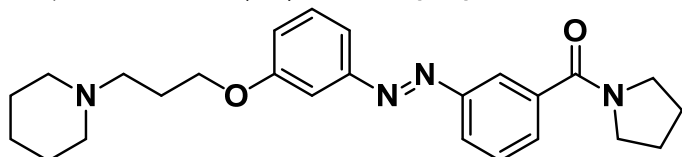

**(E)-3-((3-(3-(Piperidin-1-yl)propoxy)phenyl)diazenyl)phenyl)(pyrrolidin-1-yl)methanone (28)**

$\text{Cs}_2\text{CO}_3$  (142 mg, 0.436 mmol) was added to an oven-dried microwave tube and flame-dried under vacuum. Catalyst  $[(\text{C}_3\text{H}_5)\text{PdCl}]_2$  (6.1 mg, 0.017 mmol) and Rockphos (22 mg, 0.047 mmol) were added. The tube was evacuated and backfilled three times with nitrogen. Bromide **22** (104 mg, 0.289 mmol) was dissolved in toluene (279  $\mu\text{L}$ ) and this solution was added to the reaction vial via a syringe. Then, 3-(piperidin-1-yl)propan-1-ol (85  $\mu\text{L}$ , 0.56 mmol) was added via a syringe. The tube was heated in a 90  $^\circ\text{C}$  sand bath for 23 hours. The mixture was cooled to RT, filtered over Celite<sup>®</sup> and the filter cake was washed with MeOH (10 mL). The solvent was evaporated *in vacuo* and the residue was purified by flash column chromatography using EtOAc: *n*-heptane: TEA 35:64:1 to EtOAc: TEA 99:1 to yield the product as an orange viscous oil (40 mg, 33%).  $^1\text{H}$  NMR (400 MHz,  $\text{CDCl}_3$ )  $\delta$  8.09 – 8.02 (m, 1H), 8.00 – 7.93 (m, 1H), 7.68 – 7.62 (m, 1H), 7.60 – 7.51 (m, 2H), 7.46 – 7.38 (m, 2H), 7.05 (dd,  $J$  = 7.9, 2.4 Hz, 1H), 4.10 (t,  $J$  = 6.3 Hz, 2H), 3.68 (t,  $J$  = 6.9 Hz, 2H), 3.50 (t,  $J$  = 6.6 Hz, 2H), 2.56 – 2.47 (m, 2H), 2.43 (bs, 4H), 2.07 – 1.95 (m, 4H), 1.90 (p,  $J$  = 6.6 Hz, 2H), 1.61 (p,  $J$  = 5.6 Hz, 4H), 1.50 – 1.38 (m, 2H);  $^{13}\text{C}$  NMR (101 MHz,  $\text{CDCl}_3$ )  $\delta$  169.0, 159.9, 153.8, 152.3, 138.3, 129.9, 129.7, 129.4, 124.6, 121.3, 118.7, 117.4, 106.5, 66.9, 56.1, 54.8, 49.8, 46.4, 26.9, 26.6, 26.1, 24.6, 24.6. LC-MS:  $t_{\text{R}}$  = 3.85 min, purity: >99%,  $M/z$   $[\text{M}+\text{H}]^+$ : 421; HRMS calcd. for  $\text{C}_{25}\text{H}_{33}\text{N}_4\text{O}_2$   $[\text{M}+\text{H}]^+$  = 421.2598, found 421.2616.

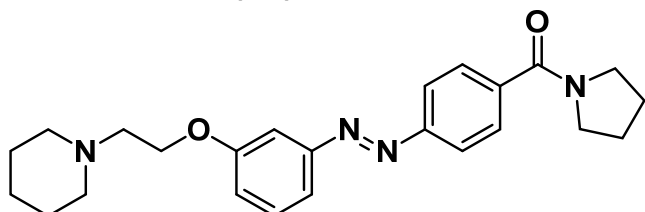

**(E)-4-((3-(2-(Piperidin-1-yl)ethoxy)phenyl)diazenyl)phenyl)(pyrrolidin-1-yl)methanone (29)**

$\text{Cs}_2\text{CO}_3$  (217 mg, 0.667 mmol) was added to an oven-dried microwave vial and flame-dried under vacuum. Catalyst  $[\text{PdCl}(\text{C}_3\text{H}_5)]_2$  (7.9 mg, 0.021 mmol) and Rockphos (24 mg, 0.052 mmol) were added. The tube was evacuated and backfilled three times with nitrogen. Bromide **23** (154 mg, 0.430 mmol) was dissolved in toluene (430  $\mu\text{L}$ ) and this solution was added to the reaction vial via a syringe. Then, 2-(piperidin-1-yl)ethanol (114  $\mu\text{L}$ , 0.858 mmol) was added via a syringe. The tube was heated in a sand bath at 90  $^\circ\text{C}$  for 72 hours. The mixture was cooled to RT, filtered through Celite<sup>®</sup> and the filter cake was washed with THF (5 mL). The solvent was evaporated *in vacuo* and the residue was subjected to flash column chromatography using a gradient from *n*-heptane: EtOAc: TEA 95:95:10 to EtOAc: TEA 95:5 followed by reverse phase column chromatography with a gradient from  $\text{H}_2\text{O}$ : ACN: formic acid 95:5:1 to  $\text{H}_2\text{O}$ : ACN: formic acid 5:95:1. This yielded an orange oil which crystallized upon storage (72 mg, 41%).  $^1\text{H}$  NMR (500 MHz,  $\text{DMSO}-d_6$ )  $\delta$  7.96 – 7.89 (m, 2H), 7.76 – 7.70 (m, 2H), 7.57 – 7.49 (m, 2H), 7.46 – 7.42 (m, 1H), 7.18 (dt,  $J$  = 7.1, 2.3 Hz, 1H), 4.17 (t,  $J$  = 5.9 Hz, 2H), 3.49 (t,  $J$  = 6.8 Hz, 2H), 3.42 (t,  $J$  = 6.5 Hz, 2H), 2.69 (t,  $J$  = 5.8 Hz, 2H), 2.47 – 2.40 (m, 4H), 1.92 – 1.79 (m, 4H), 1.50 (p,  $J$  = 5.6 Hz, 4H), 1.42 – 1.34 (m, 2H);  $^{13}\text{C}$  NMR (126 MHz,  $\text{DMSO}-d_6$ )  $\delta$  167.4, 159.4, 153.1, 152.1, 139.7, 130.4, 128.4, 122.4, 118.7, 116.6, 106.7, 66.0, 57.4, 54.5, 48.9, 46.0, 26.0, 25.6, 24.0, 24.0; LC-MS:  $t_{\text{R}}$  = 3.41 min, purity: 95.75%,  $M/z$   $[\text{M}+\text{H}]^+$ : 407; HRMS calcd. for  $\text{C}_{24}\text{H}_{31}\text{N}_4\text{O}_2$   $[\text{M}+\text{H}]^+$  = 407.2442, found 407.2439.

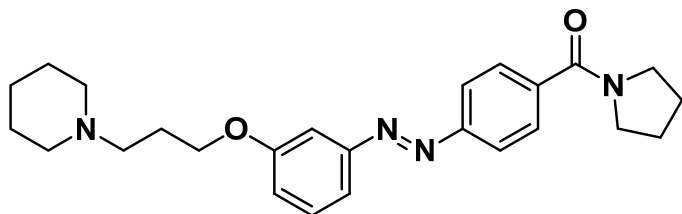

**(E)-4-((3-(3-(Piperidin-1-yl)propoxy)phenyl)diazenyl)phenyl(pyrrrolidin-1-yl)methanone (30)**

$\text{Cs}_2\text{CO}_3$  (142 mg, 0.436 mmol) was added to an oven-dried microwave tube and flame-dried under vacuum. Catalyst  $[\text{PdCl}(\text{C}_3\text{H}_5)]_2$  (6.7 mg, 0.018 mmol) and RockPhos (20.4 mg, 0.0435 mmol) were added. The tube was evacuated and backfilled three times with nitrogen. Bromide **23** (101 mg, 0.281 mmol) was dissolved in toluene (279  $\mu\text{L}$ ) and this solution was added to the reaction vial via a syringe. Then, 3-(piperidin-1-yl)propan-1-ol (85  $\mu\text{L}$ , 0.56 mmol) was added via a syringe. The tube was heated to 90  $^\circ\text{C}$  in a sand bath for 23 hours. The mixture was cooled to RT, filtered over Celite<sup>®</sup> and the filter cake was washed with MeOH (10 mL). The solvent was evaporated *in vacuo* and the residue was purified by flash column chromatography using a gradient from *n*-heptane: EtOAc: TEA 64:35:1 to EtOAc: TEA 99:1 followed by column chromatography using an isocratic elution with EtOAc: *n*-heptane: TEA 71:25:4. The product was obtained as a viscous orange oil (45 mg, 38%).  $^1\text{H}$  NMR (400 MHz,  $\text{CDCl}_3$ )  $\delta$  7.93 (d,  $J$  = 8.4 Hz, 2H), 7.67 (d,  $J$  = 8.4 Hz, 2H), 7.58 – 7.52 (m, 1H), 7.46 – 7.38 (m, 2H), 7.05 (dd,  $J$  = 8.2, 2.6 Hz, 1H), 4.11 (t,  $J$  = 6.3 Hz, 2H), 3.67 (t,  $J$  = 6.9 Hz, 2H), 3.46 (t,  $J$  = 6.6 Hz, 2H), 2.67 – 2.33 (m, 6H), 2.06 (p,  $J$  = 6.6 Hz, 2H), 2.01 – 1.94 (m, 2H), 1.94 – 1.84 (m, 2H), 1.64 (p,  $J$  = 5.6 Hz, 4H), 1.51 – 1.40 (m, 2H);  $^{13}\text{C}$  NMR (101 MHz,  $\text{CDCl}_3$ )  $\delta$  169.1, 159.8, 153.9, 153.2, 139.4, 129.9, 128.2, 122.9, 118.8, 117.6, 106.5, 66.8, 56.1, 54.7, 49.7, 46.4, 26.7, 26.6, 25.8, 24.6, 24.4; LC-MS:  $t_{\text{R}}$  = 3.43 min, purity: >99%,  $M/z$   $[\text{M}+\text{H}]^+$ : 421; HRMS calcd. for  $\text{C}_{25}\text{H}_{33}\text{N}_4\text{O}_2$   $[\text{M}+\text{H}]^+$  = 421.2598, found 421.2615.

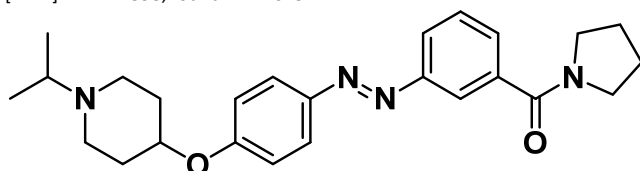

**(E)-3-((4-((1-Isopropylpiperidin-4-yl)oxy)phenyl)diazenyl)phenyl(pyrrrolidin-1-yl)methanone (31)**

Phenol **10** (0.150 g, 0.508 mmol), 1-isopropylpiperidin-4-ol (0.218 g, 1.52 mmol) and  $\text{PPh}_3$  (0.400 g, 1.52 mmol) were dissolved in ice-cooled THF (9.0 mL). DEAD (0.241 mL, 1.52 mmol) in THF (6.0 mL) was added to the solution. The reaction mixture was stirred at 0  $^\circ\text{C}$  for 2 hours and at RT for 16 hours aq. sat.  $\text{NH}_4\text{Cl}$  solution (12 mL) was added. The mixture was extracted using EtOAc (3x30 mL). The combined organic phases were washed with brine (30 mL), dried over  $\text{Na}_2\text{SO}_4$ , filtered and evaporated *in vacuo*. The crude residue was purified using flash column chromatography with a gradient from EtOAc: *n*-heptane: TEA 75:24:1 to EtOAc: TEA 99:1. The compound was heated in *n*-heptane. The mixture was cooled and filtered. The filtrate was evaporated *in vacuo* to yield the product as a yellow fluffy powder (156 mg, 73%).  $^1\text{H}$  NMR (500 MHz,  $\text{DMSO}-d_6$ )  $\delta$  7.96 – 7.84 (m, 4H), 7.69 – 7.59 (m, 2H), 7.17 – 7.09 (m, 2H), 4.54 – 4.45 (m, 1H), 3.49 (t,  $J$  = 6.9 Hz, 2H), 3.41 (t,  $J$  = 6.5 Hz, 2H), 2.77 – 2.62 (m, 3H), 2.40 – 2.30 (m, 2H), 2.04 – 1.94 (m, 2H), 1.88 (p,  $J$  = 6.7 Hz, 2H), 1.82 (p,  $J$  = 6.2 Hz, 2H), 1.67 – 1.56 (m, 2H), 0.97 (d,  $J$  = 6.5 Hz, 6H);  $^{13}\text{C}$  NMR (126 MHz,  $\text{DMSO}-d_6$ )  $\delta$  167.4, 160.4, 151.7, 145.8, 138.4, 129.5, 129.1, 124.9, 123.9, 120.2, 116.1, 73.5, 53.6, 49.0, 46.0, 45.3, 31.1, 26.0, 24.0, 18.1; LC-MS:  $t_{\text{R}}$  = 3.46 min, purity: >99%,  $M/z$   $[\text{M}+\text{H}]^+$ : 421; HRMS calcd. for  $\text{C}_{25}\text{H}_{33}\text{N}_4\text{O}_2$   $[\text{M}+\text{H}]^+$  = 421.2598, found 421.2617.

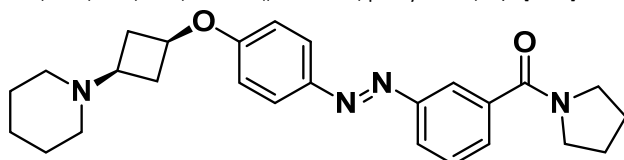

**(3-((E)-4-((1s,3s)-3-(Piperidin-1-yl)cyclobutoxy)phenyl)diazenyl)phenyl(pyrrrolidin-1-yl)methanone (32)**

$\text{Cs}_2\text{CO}_3$  (0.205 g, 0.628 mmol) was added to an oven-dried microwave tube and flame-dried under vacuum. Bromide **24** (0.150 g, 0.419 mmol) was dissolved in toluene (1.20 mL) and added to the vial. Rockphos (0.031 g, 0.067 mmol), cyclobutanol **35** (0.130 g, 0.837 mmol) and  $[(\text{C}_3\text{H}_5)_2\text{PdCl}]_2$  (7.6 mg, 0.021 mmol) were subsequently added to the vial. The flask was evacuated and backfilled three times with nitrogen. The microwave vial was heated in a sand bath at 90  $^\circ\text{C}$  and for 24 hours. The mixture was cooled to RT, filtered over Celite<sup>®</sup> and the filter cake was washed with MeOH (10 mL). The solvent was evaporated *in vacuo*, after which the crude product was subjected to flash column chromatography using a gradient from *n*-heptane: EtOAc: TEA 50:45:5 to EtOAc: TEA 95:5 to yield the product as orange crystals (68 mg, 38%).  $^1\text{H}$  NMR (500 MHz,  $\text{CDCl}_3$ )  $\delta$  8.03 – 7.99 (m, 1H), 7.93 – 7.85 (m, 3H), 7.59 (d,  $J$  = 7.6 Hz, 1H), 7.53 (t,  $J$  = 7.7 Hz, 1H), 6.94 – 6.88 (m, 2H), 4.50 (p,  $J$  = 7.1 Hz, 1H), 3.68 (t,  $J$  = 7.0 Hz, 2H), 3.49 (t,  $J$  = 6.6 Hz, 2H), 2.77 – 2.68 (m, 2H), 2.54 – 2.05 (m, 7H), 1.98 (p,  $J$  = 6.9 Hz, 2H), 1.89 (p,  $J$  = 6.8 Hz, 2H), 1.69 – 1.55 (m, 4H), 1.51 – 1.39 (m, 2H);  $^{13}\text{C}$  NMR (126 MHz,  $\text{CDCl}_3$ )  $\delta$  169.2, 160.4, 152.5, 146.9, 138.2, 129.3, 129.0, 125.0, 124.3, 121.0, 115.4, 65.7, 52.6, 51.0, 49.8, 46.4, 35.6, 26.6, 25.4, 24.6, 24.3; LC-MS:  $t_{\text{R}}$  = 3.28 min, purity: >99%,  $M/z$   $[\text{M}+\text{H}]^+$ : 433; HRMS calcd. for  $\text{C}_{26}\text{H}_{33}\text{N}_4\text{O}_2$   $[\text{M}+\text{H}]^+$  = 433.2598, found 433.2610; *Cis*-stereochemistry was proven by 2D NOE NMR (see Figure S36).

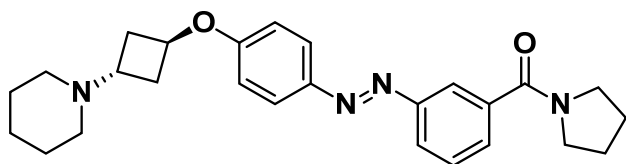

**(3-((E)-(4-((1r,3s)-3-(piperidin-1-yl)cyclobutoxy)phenyl)diazenyl)phenyl)(pyrrolidin-1-yl)methanone (33)**

Phenol **10** (0.100 g, 0.339 mmol), cyclobutanol **35** (0.105 g, 0.677 mmol) and  $\text{PPh}_3$  (0.266 g, 1.02 mmol) were dissolved in ice-cooled THF (6.0 mL). DEAD (0.161 mL, 1.02 mmol) in THF (4 mL) was added to the solution. After 23 hours at RT, aq. sat.  $\text{NaHCO}_3$  solution (8 mL) was added. The mixture was extracted with EtOAc (3x20 mL). The combined organic phases were washed with brine (20 mL), dried over  $\text{Na}_2\text{SO}_4$  and evaporated *in vacuo*. The residue was purified using flash column chromatography with a gradient from *n*-heptane: EtOAc: TEA 82:17:1 to EtOAc: TEA 99:1. The compound was heated in *n*-heptane. The mixture was cooled and filtered. The filtrate was evaporated *in vacuo* to yield the product as a yellow fluffy solid (48 mg, 33%).  $^1\text{H}$  NMR (400 MHz,  $\text{DMSO}-d_6$ )  $\delta$  7.94 – 7.85 (m, 4H), 7.68 – 7.59 (m, 2H), 7.06 – 6.98 (m, 2H), 4.85 (tt,  $J = 6.9, 3.5$  Hz, 1H), 3.50 (t,  $J = 6.8$  Hz, 2H), 3.42 (t,  $J = 6.5$  Hz, 2H), 2.94 – 2.82 (m, 1H), 2.45 – 2.35 (m, 2H), 2.33 – 2.12 (m, 6H), 1.95 – 1.77 (m, 4H), 1.50 (p,  $J = 5.4$  Hz, 4H), 1.44 – 1.34 (m, 2H);  $^{13}\text{C}$  NMR (126 MHz,  $\text{DMSO}-d_6$ )  $\delta$  167.4, 160.3, 151.7, 146.0, 138.4, 129.5, 129.1, 124.9, 123.9, 120.2, 115.6, 70.0, 56.4, 50.5, 49.0, 46.0, 33.1, 26.0, 25.3, 24.1, 24.0; LC-MS:  $t_{\text{R}} = 3.34$  min, purity: >99%,  $\text{M/z}$   $[\text{M}+\text{H}]^+$ : 433; HRMS calcd. for  $\text{C}_{26}\text{H}_{33}\text{N}_4\text{O}_2$   $[\text{M}+\text{H}]^+$  = 433.2598, found 433.2603; *Trans*-stereochemistry was proven by 2D NOE NMR (see Figure S37).

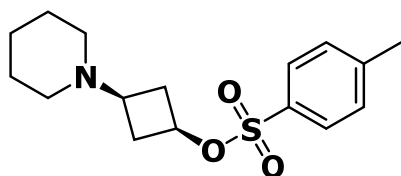

**(1s,3s)-3-(piperidin-1-yl)cyclobutyl 4-methylbenzenesulfonate (36)**

This procedure was based on a literature description<sup>2</sup>. 1-methylimidazole (0.339 mL, 4.25 mmol) and cyclobutanol **35** (330 mg, 2.13 mmol) were mixed in anhydrous DCM (3.5 mL) after which 4-toluenesulfonyl chloride (689 mg, 3.61 mmol) was added. The solution was stirred at RT for 48 hours. Aq. satd.  $\text{NaHCO}_3$  (3 mL) was added and the layers were partitioned. The organic phase was dried over  $\text{Na}_2\text{SO}_4$ , and evaporated *in vacuo*. The crude product was further purified using flash column chromatography eluting with DCM : MeOH : 28% aq.  $\text{NH}_3$  (990:9:1) to yield the product as an off-white colored solid (280 mg, 43%).  $^1\text{H}$  NMR (600 MHz,  $\text{CDCl}_3$ )  $\delta$  7.76 (d,  $J = 8.1$  Hz, 2H), 7.32 (d,  $J = 8.0$  Hz, 2H), 4.58 (p,  $J = 7.5$  Hz, 1H), 2.47 – 2.37 (m, 5H), 2.28 – 2.10 (m, 5H), 2.07 – 1.98 (m, 2H), 1.54 (p,  $J = 5.8$  Hz, 4H), 1.45 – 1.35 (m, 2H);  $^{13}\text{C}$  NMR (126 MHz,  $\text{CDCl}_3$ )  $\delta$  144.8, 134.2, 129.9, 128.0, 68.8, 52.4, 50.9, 36.0, 25.5, 24.2, 21.8; LC-MS:  $t_{\text{R}} = 2.84$  min, purity: 88.5%,  $\text{M/z}$   $[\text{M}+\text{H}]^+$ : 310; *cis*-stereochemistry was proven by 2D NOE NMR (see Figure S38).

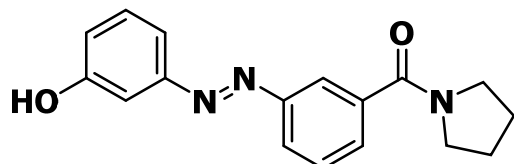

**(E)-3-((3-hydroxyphenyl)diazenyl)phenyl)(pyrrolidin-1-yl)methanone (37)**

Aniline **6** (670 mg, 3.52 mmol) was added to a mixture of Oxone<sup>™</sup> (4.33 g, 7.04 mmol) dissolved in water (44 mL) and DCM (11 mL). The mixture was stirred at RT for 6 hours. The layers were separated and the organic phase was washed with 10% aq. sodium thiosulfate (5 mL), 1 M aq. HCl solution (5 mL) and brine (5 mL). The organic phase was added to a flask containing 3-((*tert*-butyldimethylsilyl)oxy)aniline (715 mg, 3.20 mmol) and acetic acid (11 mL). After stirring overnight at RT the solution was evaporated to dryness and anhydrous THF (33 mL) and 1 M TBAF solution in THF (6.40 mL, 6.40 mmol) were added at ice-bath temperature. After 10 minutes aq. satd.  $\text{NaHCO}_3$  (40 mL) and EtOAc (30 mL) were added and the mixture was extracted using EtOAc (3x 30 mL). The combined organic phases were washed with brine (30 mL), dried over  $\text{Na}_2\text{SO}_4$  and evaporated *in vacuo*. The crude product was subjected to preparative reverse phase chromatography on C-18 functionalized silica eluting with a gradient from  $\text{H}_2\text{O}:\text{ACN}:\text{HCOOH}$  949:50:1 to  $\text{ACN}:\text{formic acid}:\text{HCOOH}$  100:899:1 to yield the product as an orange solid (120 mg, 13%).  $^1\text{H}$  NMR (600 MHz,  $\text{CDCl}_3$ )  $\delta$  8.00 (s, 1H), 7.84 (d,  $J = 7.8$  Hz, 1H), 7.59 (d,  $J = 7.5$  Hz, 1H), 7.46 (t,  $J = 7.7$  Hz, 1H), 7.40 (d,  $J = 7.8$  Hz, 1H), 7.30 (t,  $J = 7.9$  Hz, 1H), 7.23 (t,  $J = 2.1$  Hz, 1H), 6.98 (dd,  $J = 8.1, 2.4$  Hz, 1H), 3.72 (t,  $J = 7.0$  Hz, 2H), 3.48 (t,  $J = 6.6$  Hz, 2H), 1.99 (p,  $J = 6.9$  Hz, 2H), 1.90 (p,  $J = 6.7$  Hz, 2H);  $^{13}\text{C}$  NMR (151 MHz,  $\text{CDCl}_3$ )  $\delta$  169.7, 157.5, 153.6, 152.3, 137.6, 129.9, 129.4, 129.3, 124.6, 121.3, 119.2, 117.0, 108.0, 50.0, 46.7, 26.5, 24.6; LC-MS:  $t_{\text{R}} = 4.09$  min, purity: >98%,  $\text{M/z}$   $[\text{M}+\text{H}]^+$ : 296.

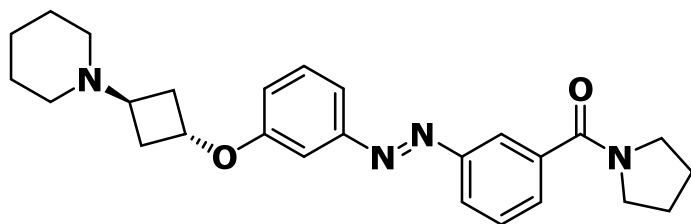

**(3-((E)-3-((1r,3s)-3-(piperidin-1-yl)cyclobutoxy)phenyl)diazenyl)phenyl)(pyrrolidin-1-yl)methanone (**34**)**

Phenol **37** (120 mg, 0.406 mmol) was dissolved in anhydrous DMF (433  $\mu$ L) after which sodium hydride (60% dispersion in mineral oil, 20.0 mg, 0.500 mmol) was added. The solution was stirred for 30 minutes at RT after which tosylate **36** (97 mg, 0.313 mmol) was added and the solution was stirred overnight at 90  $^{\circ}$ C. EtOAc (5 mL) was added to the solution. The mixture was washed using ice-cold brine (2 x 2 mL). The organic phase was dried over  $\text{Na}_2\text{SO}_4$  and evaporated *in vacuo* to obtain an orange crude product which was purified using flash column chromatography eluting with a gradient from cyclohexane:EtOAc + 5% TEA 8:2 to EtOAc + 5% TEA:MeOH 19:1 to yield the product as a sticky orange oil (80 mg, 59%).  $^1\text{H}$  NMR (600 MHz,  $\text{CD}_3\text{OD}$ )  $\delta$  8.06 – 8.03 (m, 1H), 8.01 (dt,  $J$  = 7.4, 1.8 Hz, 1H), 7.69 – 7.61 (m, 2H), 7.58 – 7.53 (m, 1H), 7.46 (t,  $J$  = 8.0 Hz, 1H), 7.33 (t,  $J$  = 2.1 Hz, 1H), 7.01 (dd,  $J$  = 8.1, 2.0 Hz, 1H), 4.86 (s, 1H), 3.63 (t,  $J$  = 7.0 Hz, 2H), 3.50 (t,  $J$  = 6.7 Hz, 2H), 3.09 (p,  $J$  = 7.5 Hz, 1H), 2.54 – 2.24 (m, 8H), 2.01 (p,  $J$  = 6.8 Hz, 2H), 1.92 (p,  $J$  = 6.7 Hz, 2H), 1.64 (p,  $J$  = 5.7 Hz, 4H), 1.50 (s, 2H). The signal at 4.86 ppm is obscured by the peak of  $\text{H}_2\text{O}$ ;  $^{13}\text{C}$  NMR (151 MHz,  $\text{CD}_3\text{OD}$ )  $\delta$  170.8, 159.7, 155.0, 153.7, 139.3, 131.2, 130.7, 130.6, 125.6, 122.1, 119.9, 118.1, 108.5, 70.4, 58.7, 52.0, 50.9, 47.5, 34.3, 27.3, 26.1, 25.3, 24.9; LC-MS:  $t_{\text{R}}$  = 3.69 min, purity: >99%,  $\text{M/z}$   $[\text{M}+\text{H}]^+$ : 433; HRMS calcd. for  $\text{C}_{26}\text{H}_{33}\text{N}_4\text{O}_2$   $[\text{M}+\text{H}]^+$  = 433.2598, found 433.2606; *Trans*-stereochemistry was proven by 2D NOE NMR (see Figure S39).

## Chemical analyses

$^1\text{H}$  NMR (400 MHz,  $\text{DMSO}-d_6$ )  $\delta$  9.93 (bs, 1H), 8.00 – 7.93 (m, 1H), 7.84 (d,  $J = 8.6$  Hz, 1H), 7.70 (d,  $J = 8.5$  Hz, 1H), 7.50 (dd,  $J = 8.5, 1.7$  Hz, 1H), 7.18 – 7.08 (m, 2H), 3.56 – 3.42 (m, 4H), 1.96 – 1.73 (m, 4H).

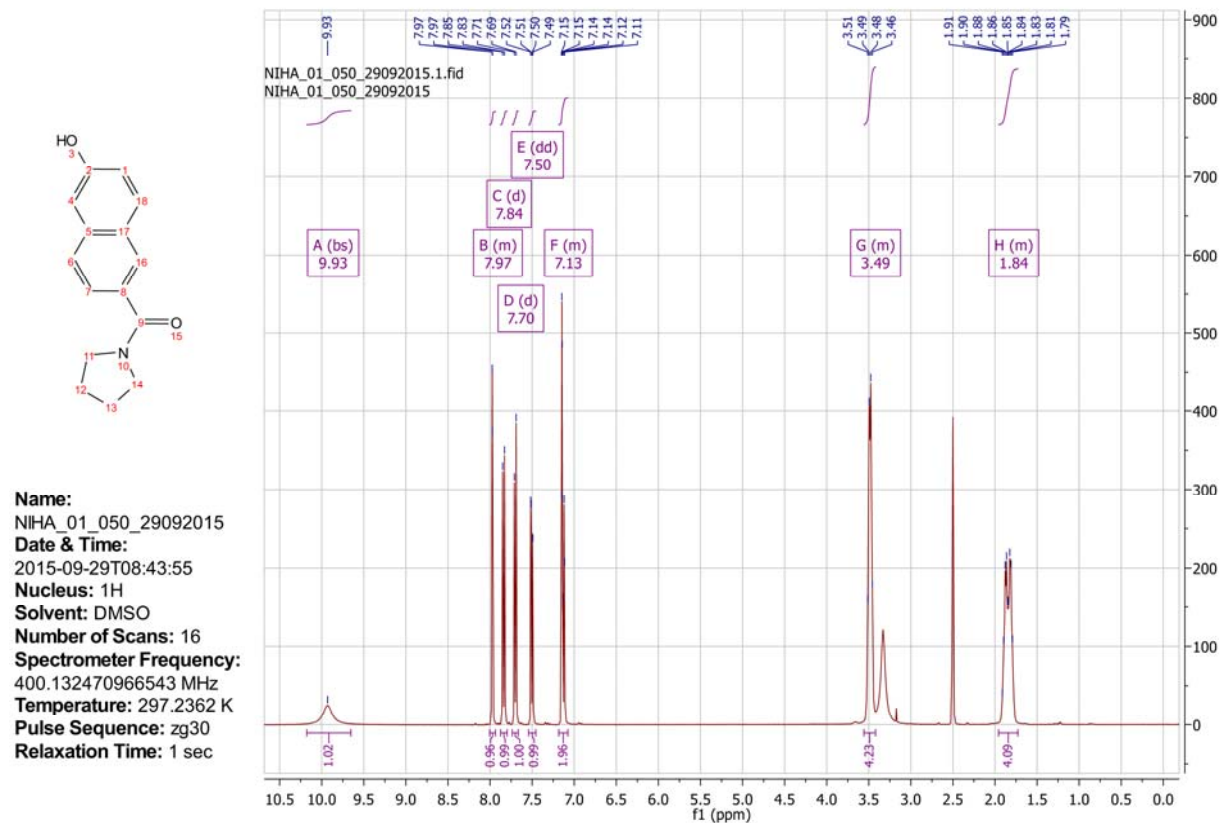

Figure S40:  $^1\text{H}$ -NMR spectrum of (6-Hydroxynaphthalen-2-yl)(pyrrolidin-1-yl)methanone (38)

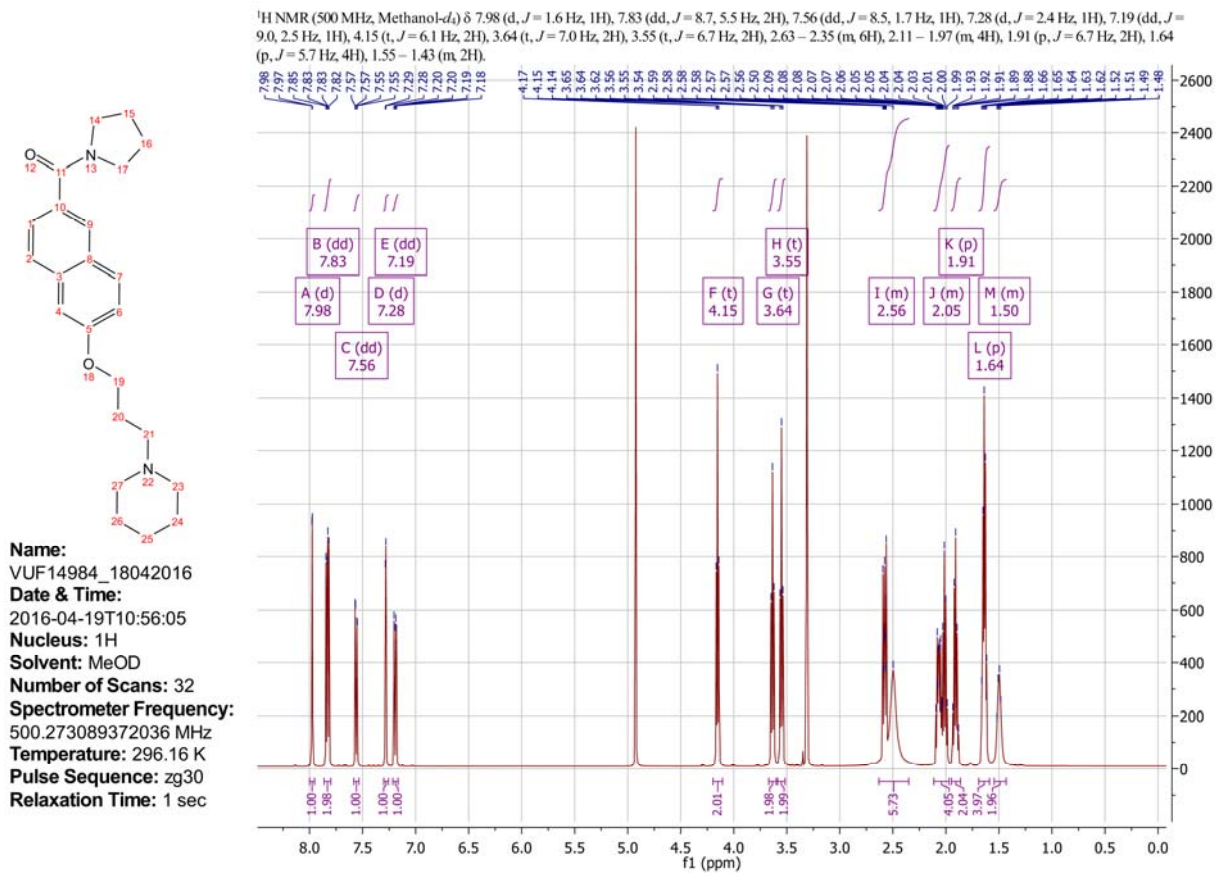

Figure S41: <sup>1</sup>H-NMR spectrum of (6-(3-(Piperidin-1-yl)propoxy)naphthalen-2-yl)(pyrrolidin-1-yl)methanone (1)

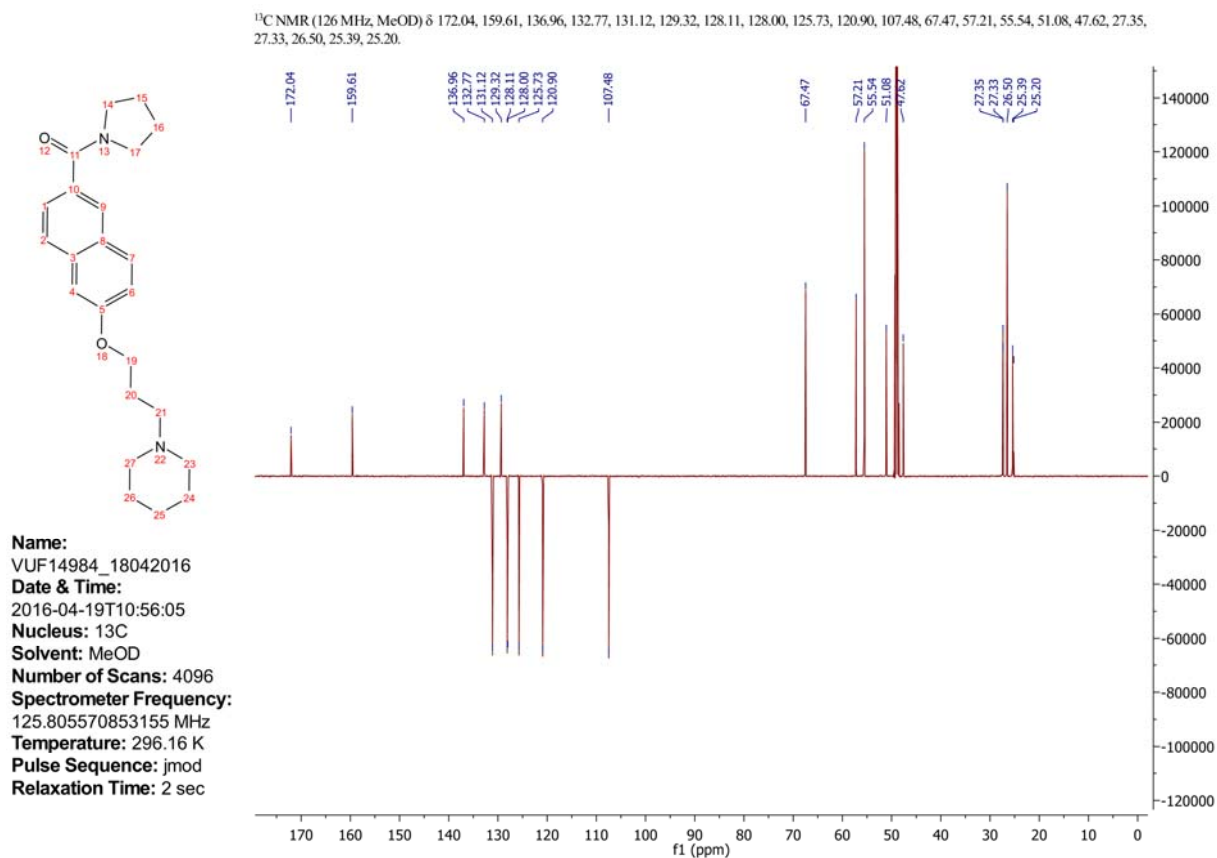

Figure S42: <sup>13</sup>C-NMR spectrum of (6-(3-(Piperidin-1-yl)propoxy)naphthalen-2-yl)(pyrrolidin-1-yl)methanone (1)



Acquired by : Admin  
 Date Acquired : 5/13/2015 1:55:37 PM  
 Sample Name : VUF14984\_DARK\_13052015  
 Sample ID :  
 Tray# : 1  
 Vial# : 24  
 Injection Volume : 10  
 Data File : C:\LabSolutions\Data\2015\2015-WK20\VUF14984\_DARK\_13052015.lcd  
 Background File : VUFBlanco\_IRRA\_2\_13052015.lcd  
 Method File : Method SCAN ACID standard azo.lcm  
 Report Format : DefaultLCMS.lcr  
 Tuning File : C:\LabSolutions\Data\Installatie NOV 2009\Tuning ESI POS + NEG JAN2010.lct  
 Processed by : Admin  
 Modified Date : 1/29/2016 10:52:32 AM

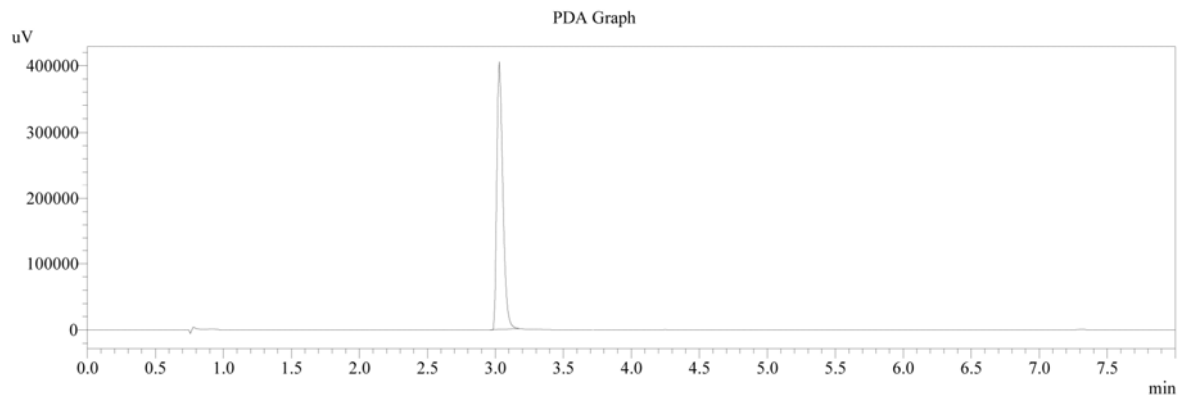

PDA Ch1 254nm 4nm

| Peak# | Name | Ret. Time | Area    | Area %  |
|-------|------|-----------|---------|---------|
| 1     |      | 3.024     | 1252683 | 100.000 |

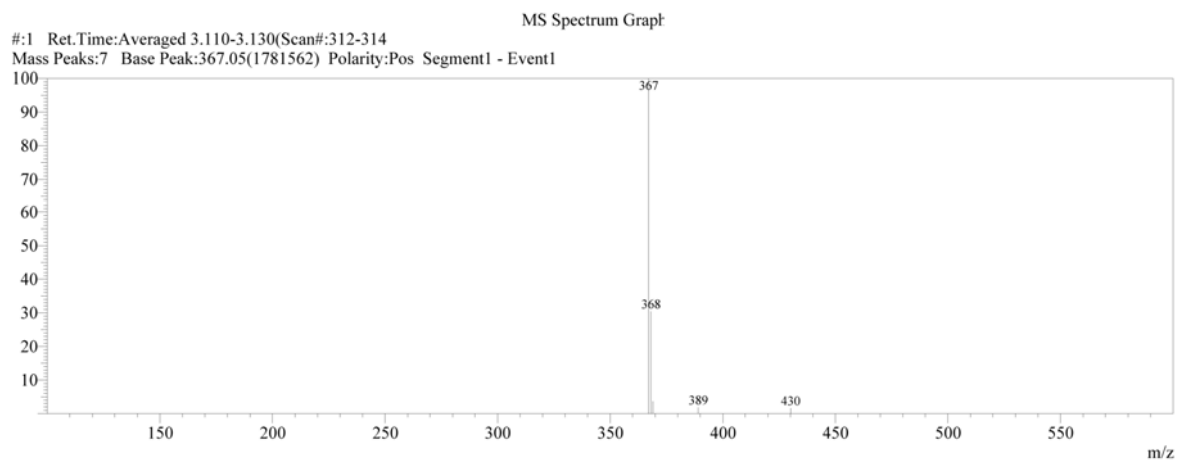

Figure S43: LC-MS chromatogram of (6-(3-(Piperidin-1-yl)propoxy)naphthalen-2-yl)(pyrrolidin-1-yl)methanone (1)

<sup>1</sup>H NMR (400 MHz, CDCl<sub>3</sub>) δ 7.23 – 7.09 (m, 2H), 6.76 – 6.66 (m, 2H), 4.55 (bs, 2H), 3.63 (bs, 2H), 3.47 (bs, 2H), 2.15 – 1.64 (m, 4H).

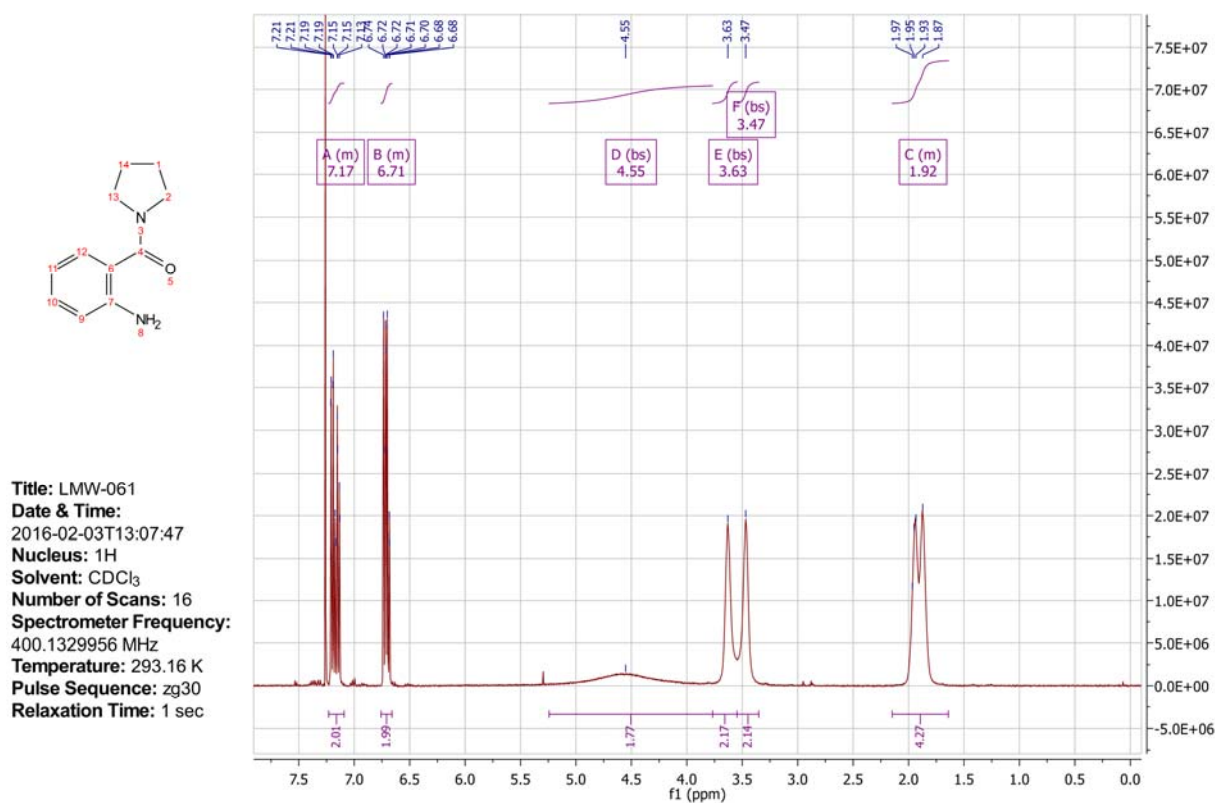

Figure S44: <sup>1</sup>H-NMR spectrum of (2-Aminophenyl)(pyrrolidin-1-yl)methanone (5)

<sup>1</sup>H NMR (400 MHz, ) δ 7.14 (t, *J* = 7.7 Hz, 1H), 6.88 – 6.77 (m, 2H), 6.74 – 6.65 (m, 1H), 3.72 (bs, 2H), 3.60 (t, *J* = 7.0 Hz, 2H), 3.40 (t, *J* = 6.6 Hz, 2H), 2.00 – 1.88 (m, 2H), 1.84 (p, *J* = 6.7 Hz, 2H).

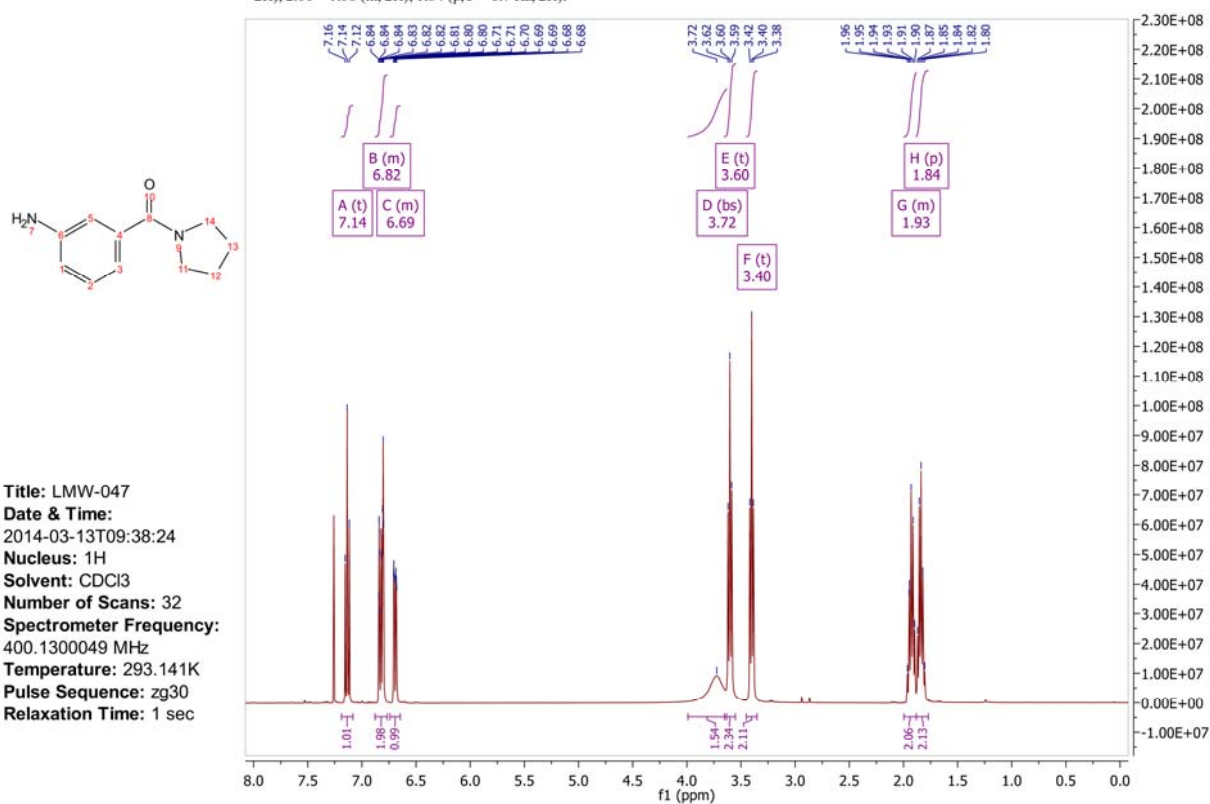

Figure S45: <sup>1</sup>H-NMR spectrum of (3-Aminophenyl)(pyrrolidin-1-yl)methanone (6)

<sup>1</sup>H NMR (250 MHz, CDCl<sub>3</sub>) δ 7.44 – 7.31 (m, 2H), 6.68 – 6.54 (m, 2H), 4.16 (bs, 2H), 3.72 – 3.39 (m, 4H), 2.05 – 1.71 (m, 4H).

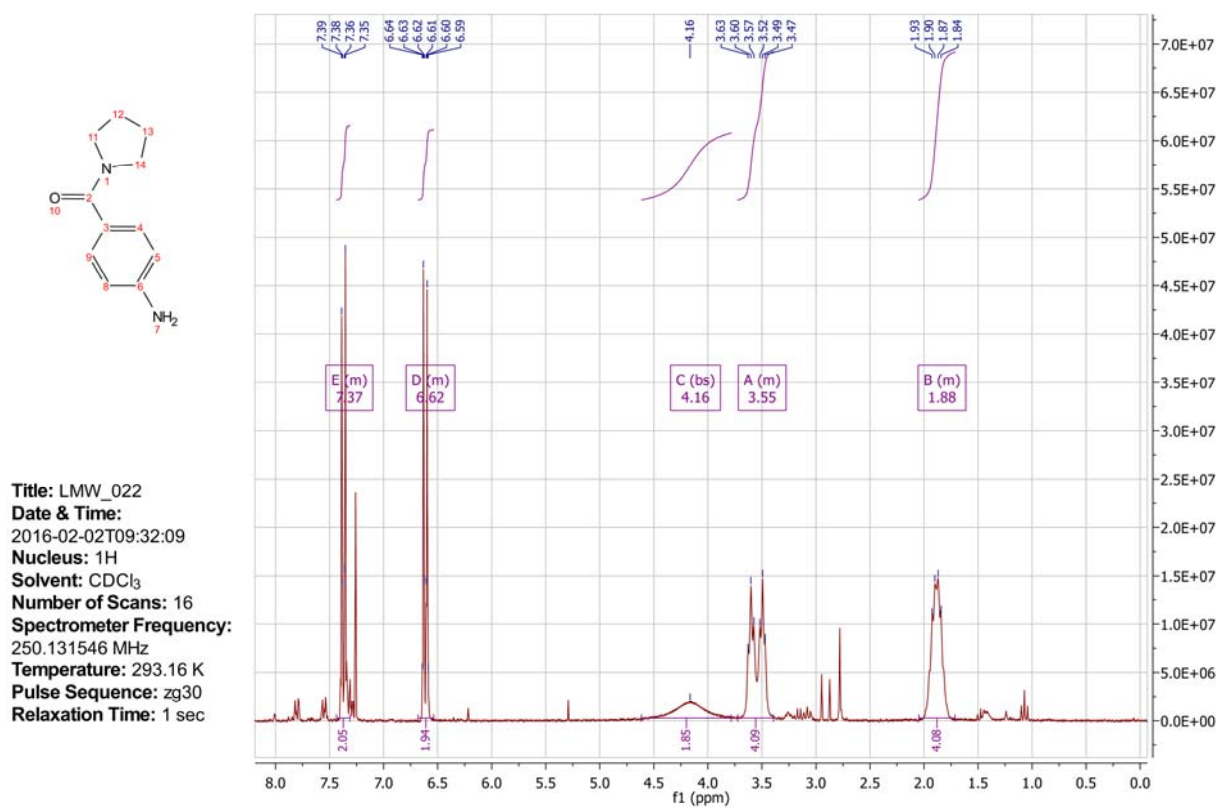

Figure S46: <sup>1</sup>H-NMR spectrum of (4-Aminophenyl)(pyrrolidin-1-yl)methanone (7)

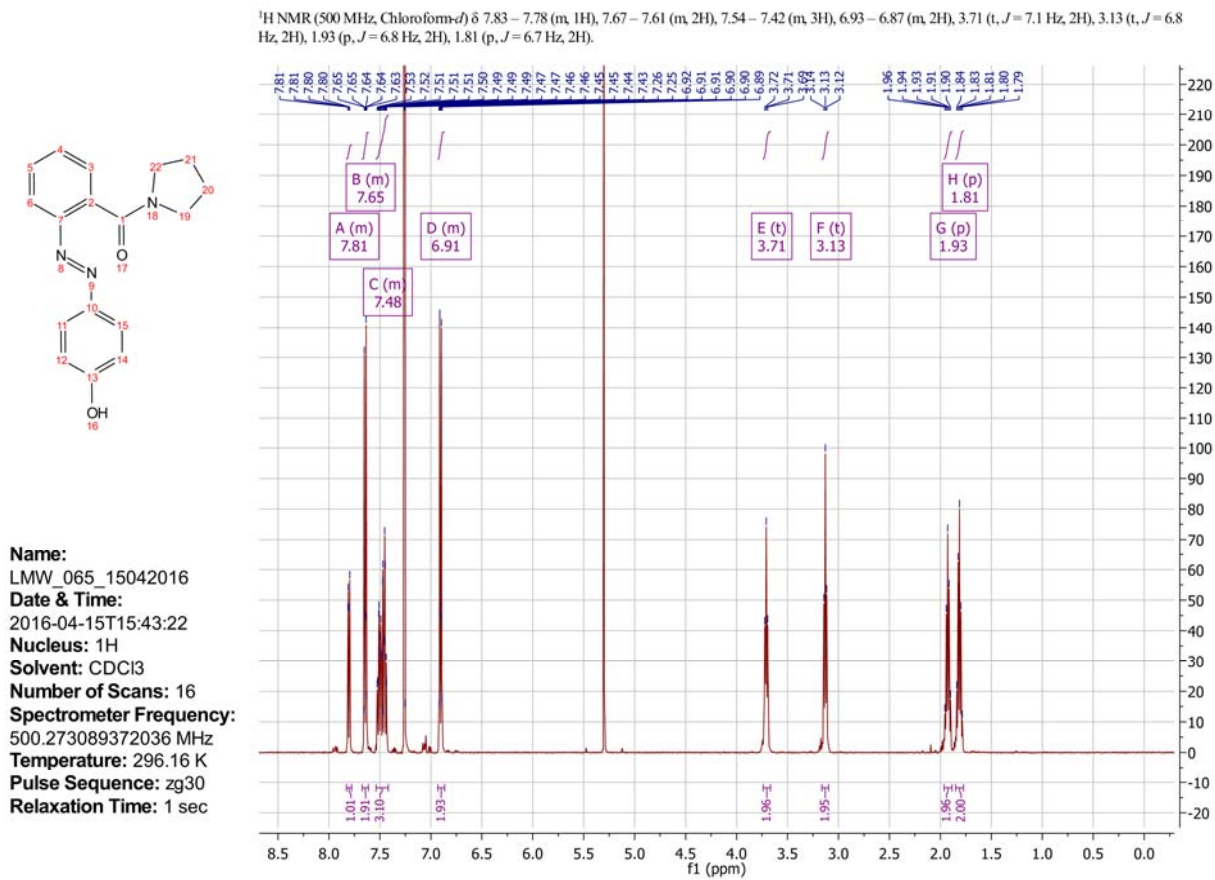

Figure S47: <sup>1</sup>H-NMR spectrum of (E)-2-((4-Hydroxyphenyl)diazenyl)phenyl(pyrrolidin-1-yl)methanone (9)

<sup>1</sup>H NMR (400 MHz, MeOD) δ 8.03 – 7.77 (m, 4H), 7.68 – 7.52 (m, 2H), 7.01 – 6.83 (m, 2H), 3.63 (t, *J* = 6.9 Hz, 2H), 3.51 (t, *J* = 6.7 Hz, 2H), 2.10 – 1.82 (m, 4H).

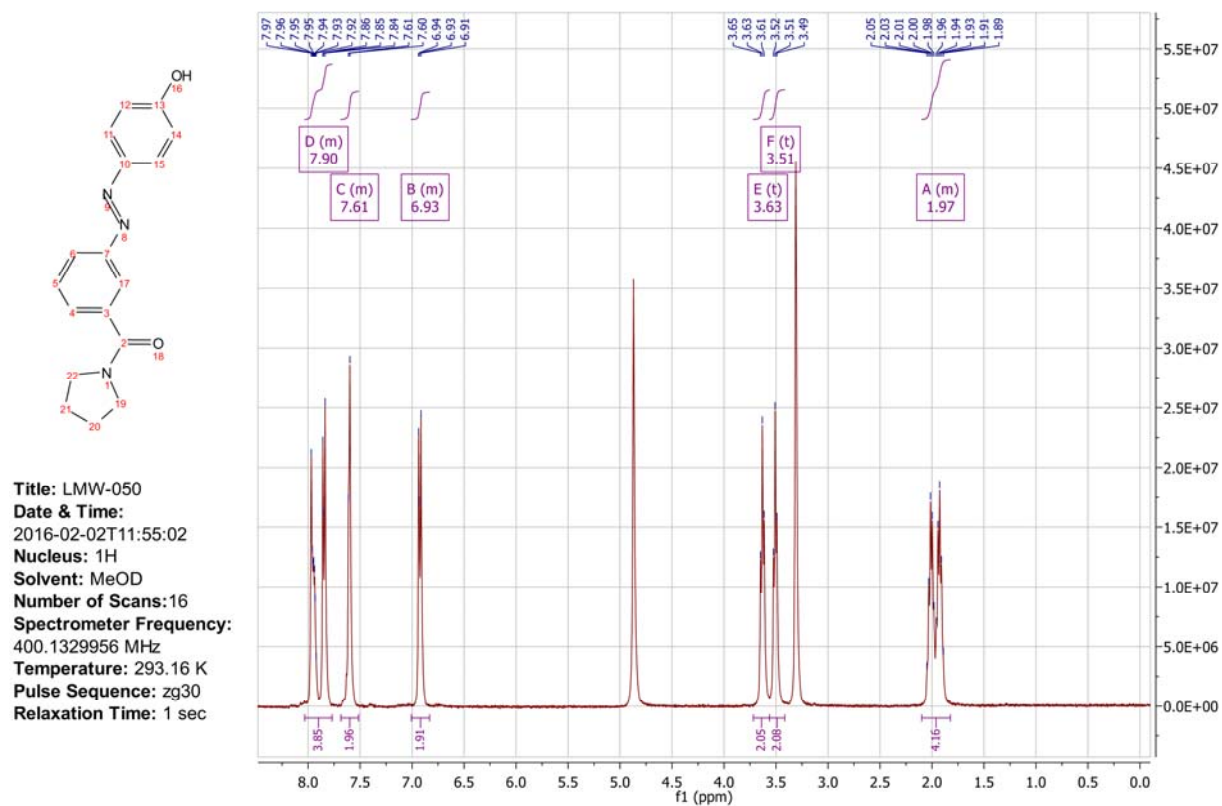

Figure S48: <sup>1</sup>H-NMR spectrum of (E)-3-((4-Hydroxyphenyl)diazenyl)phenyl(pyrrolidin-1-yl)methanone (10)

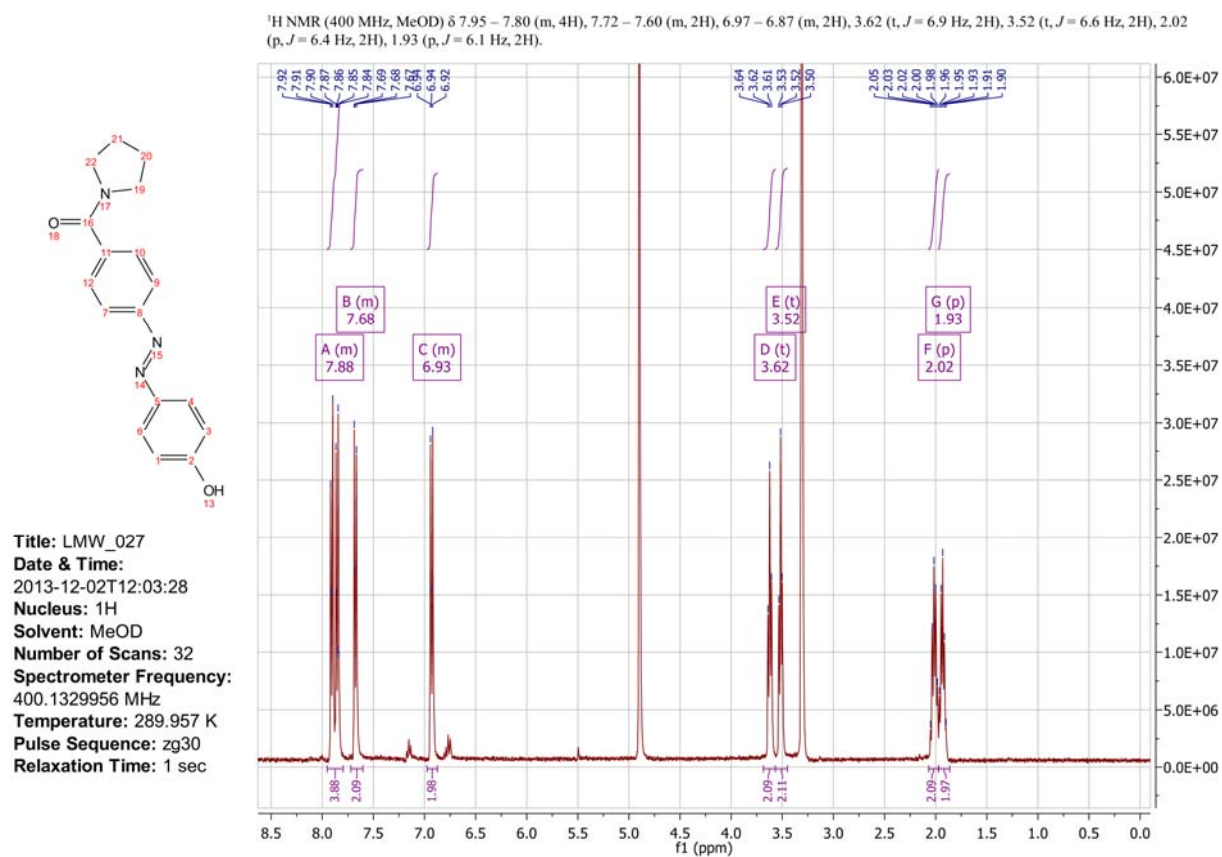

Figure S49: <sup>1</sup>H-NMR spectrum of (E)-4-((4-Hydroxyphenyl)diazenyl)phenyl(pyrrolidin-1-yl)methanone (11)

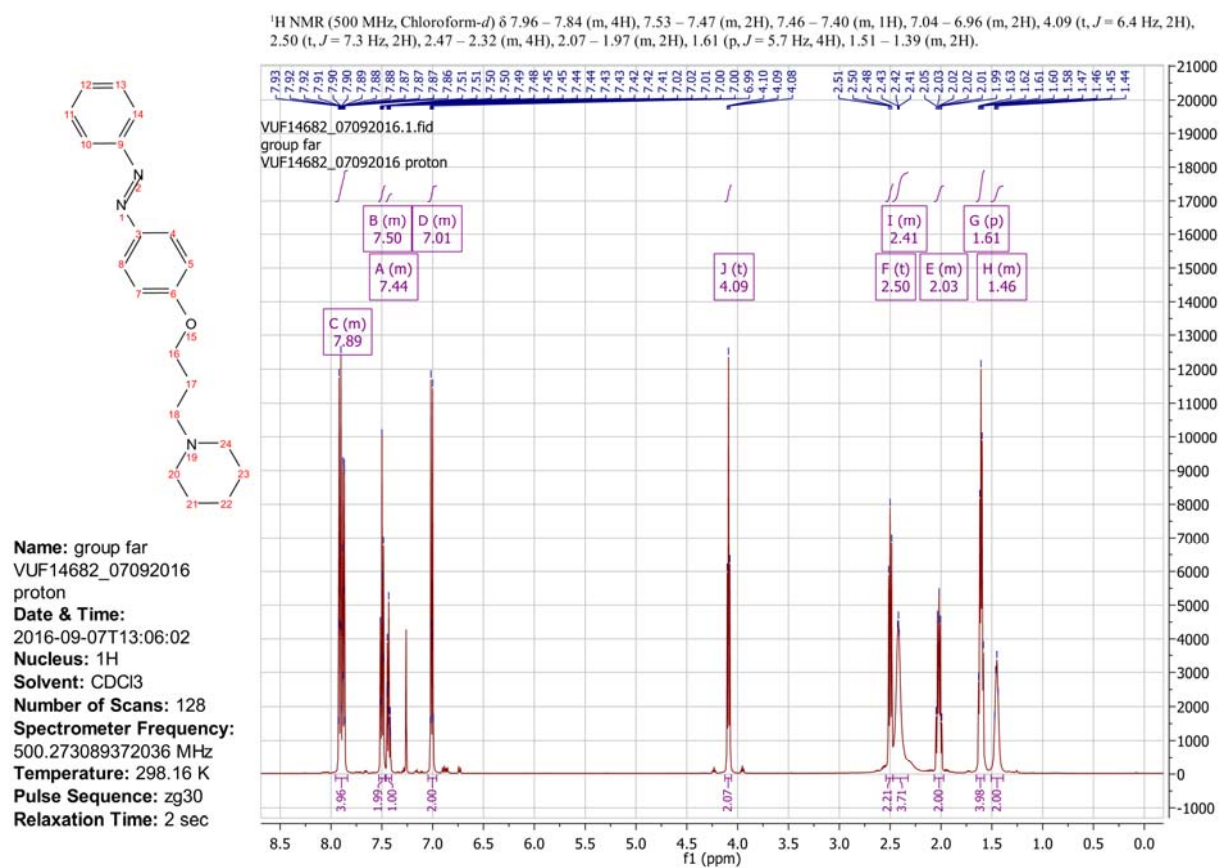

Figure S50: <sup>1</sup>H-NMR spectrum of (E)-1-(3-(4-(Phenyldiazenyl)phenoxy)propyl)piperidine (12)



$^{13}\text{C}$  NMR (126 MHz, Chloroform-*d*)  $\delta$  161.70, 152.86, 146.97, 130.43, 129.14, 124.85, 122.65, 114.82, 66.96, 56.03, 54.79, 26.88, 26.09, 24.54.

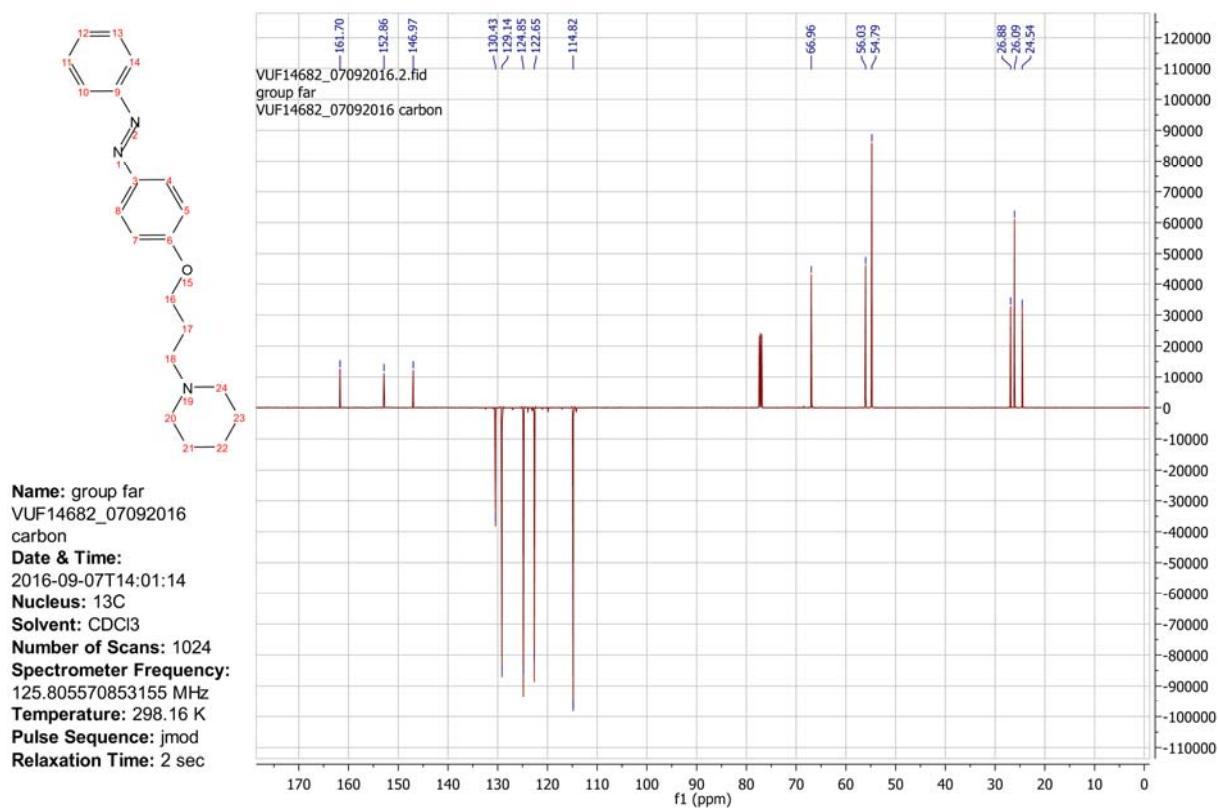

Figure S51:  $^{13}\text{C}$ -NMR spectrum of (E)-1-(3-(4-(Phenyldiazenyl)phenoxy)propyl)piperidine (12)

Acquired by : Admin  
 Date Acquired : 1/27/2016 12:56:35 PM  
 Sample Name : VUF14682\_DARK\_27012016  
 Sample ID :  
 Tray# : 1  
 Vial# : 6  
 Injection Volume : 10  
 Data File : C:\LabSolutions\Data\2016\2016 - wk04\VUF14682\_DARK\_27012016.lcd  
 Background File : BLANCO\_DARK\_27012016.lcd  
 Method File : Method SCAN ACID standard azo.lcm  
 Report Format : DefaultLCMS.lcr  
 Tuning File : C:\LabSolutions\Tuning File\Tuning-ESI-pos-neg01072015.lct  
 Processed by : Admin  
 Modified Date : 9/9/2016 3:44:37 PM

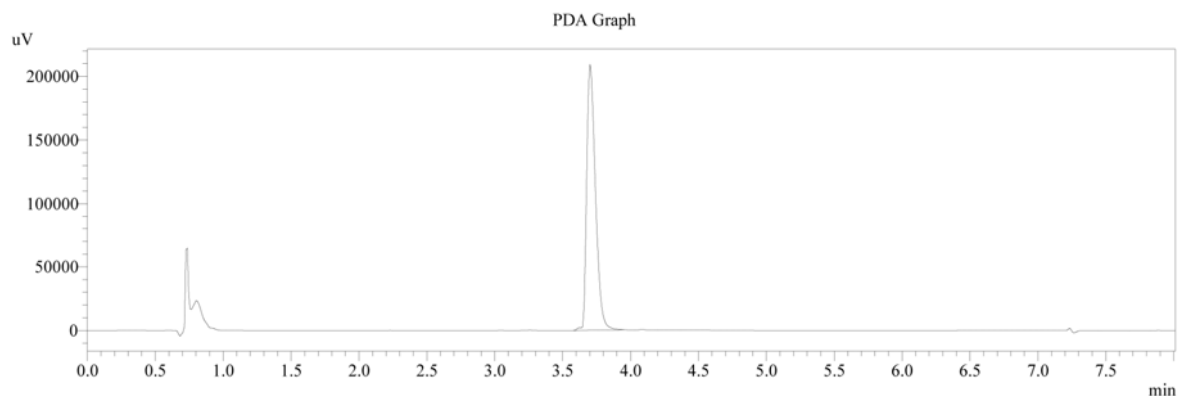

PDA Ch1 254nm 4nm

| Peak# | Name | Ret. Time | Area   | Area %  |
|-------|------|-----------|--------|---------|
| 1     |      | 3.697     | 946043 | 100.000 |

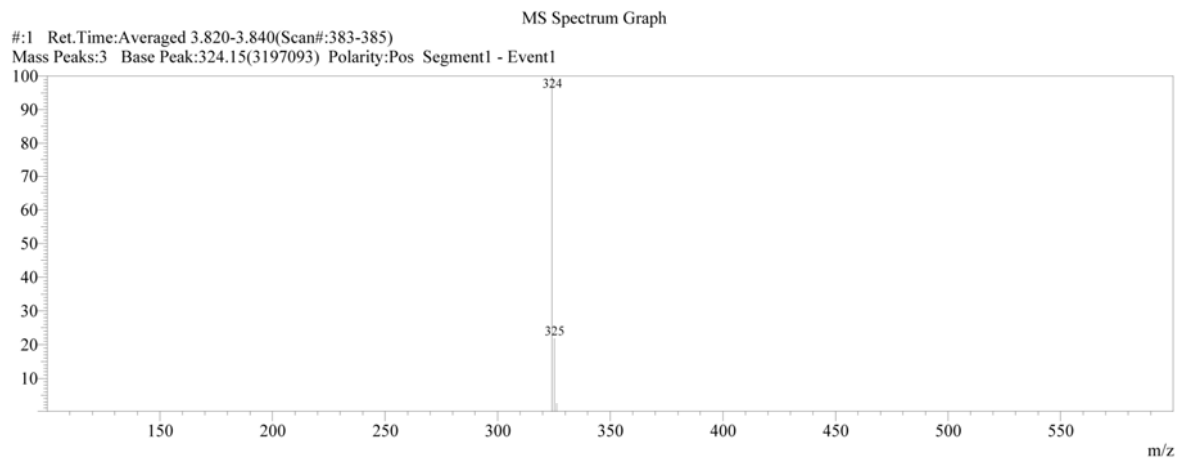

MS Spectrum Table

#:1 Ret.Time:  
 BG Mode:Calc 3.660<->4.150(367<->416)  
 Mass Peaks:3 Base Peak:324.15(3197093) Polarity:Pos Segment1 - Event1

| # | m/z    | Abs.Inten. | Rel.Inten. | Charge | Polarity | Monoisotopic | # | m/z    | Abs.Inten. | Rel.Inten. | Charge | Polarity | Monoisotopic |
|---|--------|------------|------------|--------|----------|--------------|---|--------|------------|------------|--------|----------|--------------|
| 1 | 324.15 | 3197093    | 100.00     |        |          |              | 3 | 326.20 | 74880      | 2.34       |        |          |              |
| 2 | 325.15 | 700306     | 21.90      |        |          |              |   |        |            |            |        |          |              |

Figure S52: LC-MS chromatogram of (E)-1-(3-(4-(Phenyldiazenyl)phenoxy)propyl)piperidine (12)

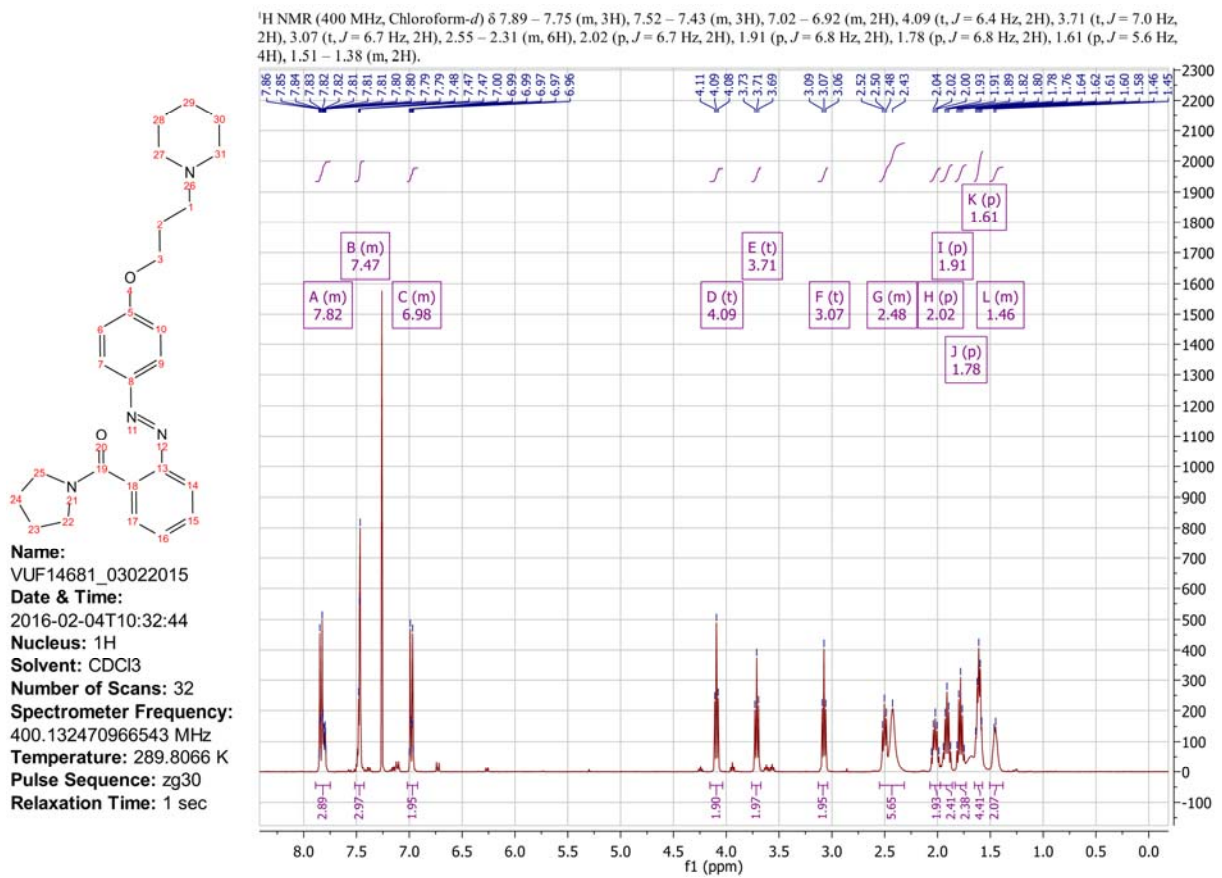

Figure S53: <sup>1</sup>H-NMR spectrum of (E)-2-((4-(3-(Piperidin-1-yl)propoxy)phenyl)diazenyl)phenyl(pyrrolidin-1-yl)methanone (13)

$^{13}\text{C}$  NMR (101 MHz,  $\text{CDCl}_3$ )  $\delta$  168.80, 162.07, 148.28, 146.97, 136.39, 130.73, 129.69, 127.50, 125.13, 118.05, 114.91, 67.01, 56.00, 54.81, 48.38, 45.72, 26.86, 26.08, 26.02, 24.87, 24.54.

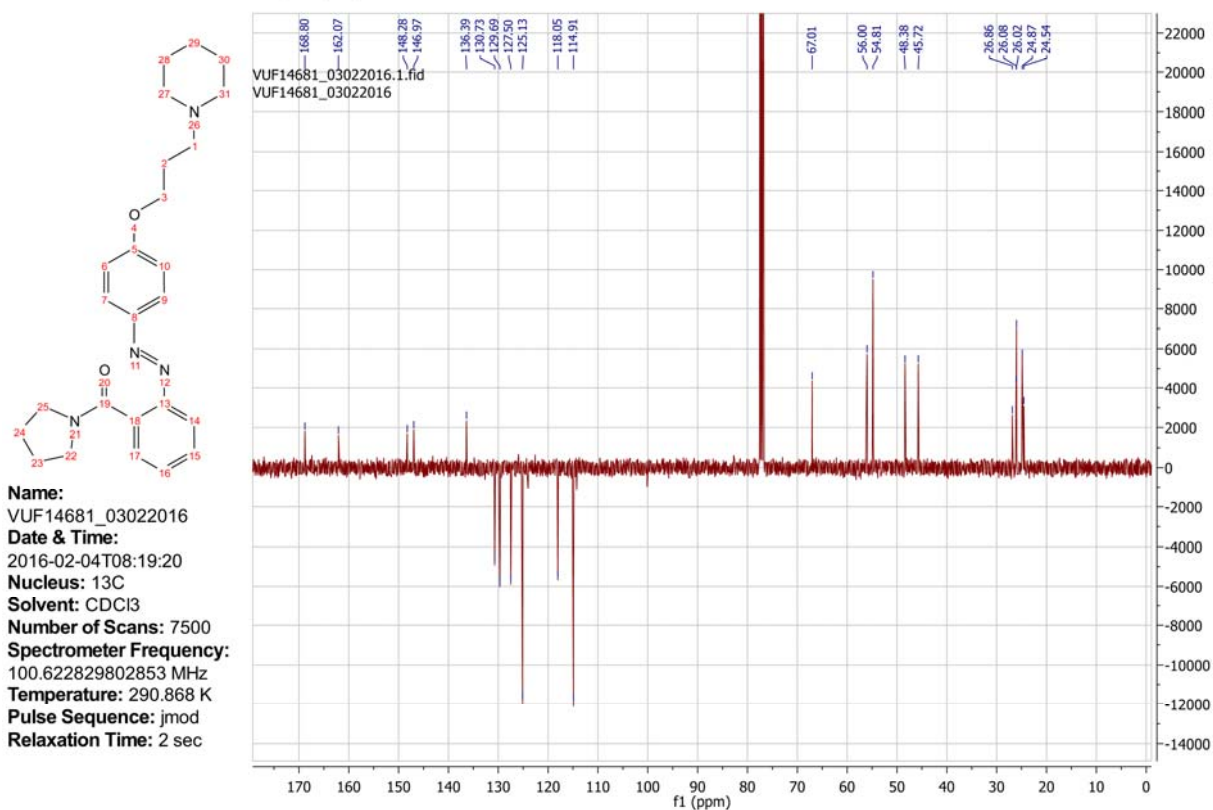

Figure S54:  $^{13}\text{C}$ -NMR spectrum of (E)-2-((4-(3-(Piperidin-1-yl)propoxy)phenyl)diazenyl)phenyl)(pyrrolidin-1-yl)methanone (13)

Acquired by : Admin  
 Date Acquired : 10/17/2014 10:20:23 AM  
 Sample Name : VUF14681\_D\_17102014  
 Sample ID :  
 Tray# : 1  
 Vial# : 14  
 Injection Volume : 10  
 Data File : C:\LabSolutions\Data\2014\2014-wk42\VUF14681\_D\_17102014.lcd  
 Background File : DMSOd6\_blanco\_D\_17102014.lcd  
 Method File : Method SCAN ACID standard azo.lcm  
 Report Format : DefaultLCMS.lcr  
 Tuning File : C:\LabSolutions\Data\Installatie NOV 2009\Tuning ESI POS + NEG JAN2010.lct  
 Processed by : Admin  
 Modified Date : 11/4/2014 12:05:03 PM

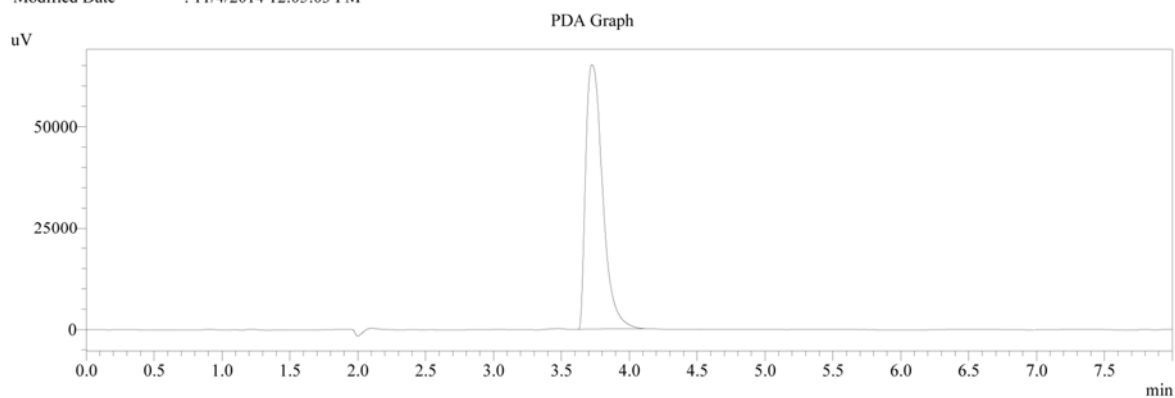

PDA Ch1 254nm 4nm

| Peak# | Name | Ret. Time | Area   | Area %  |
|-------|------|-----------|--------|---------|
| 1     |      | 3.721     | 564010 | 100.000 |

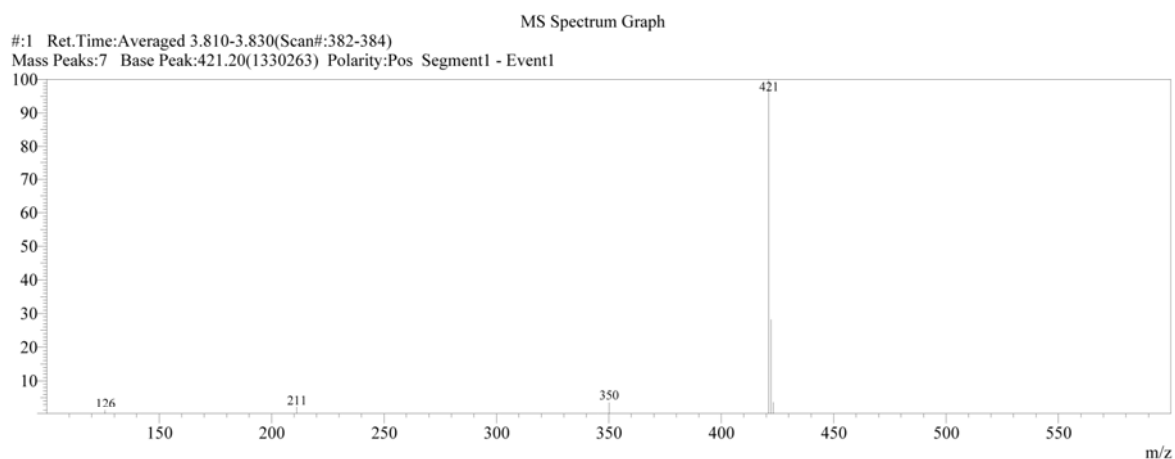

MS Spectrum Table

#1 Ret.Time:  
 BG Mode:Calc 3.660<->4.160(367<->417)  
 Mass Peaks:7 Base Peak:421.20(1330263) Polarity:Pos Segment1 - Event

| # | m/z    | Abs.Inten. | Rel.Inten. | Charge | Polarity | Monoisotopic | # | m/z    | Abs.Inten. | Rel.Inten. | Charge | Polarity | Monoisotopic |
|---|--------|------------|------------|--------|----------|--------------|---|--------|------------|------------|--------|----------|--------------|
| 1 | 125.95 | 14554      | 1.09       |        |          |              | 5 | 422.15 | 376164     | 28.28      |        |          |              |
| 2 | 211.20 | 26598      | 2.00       |        |          |              | 6 | 423.20 | 48661      | 3.66       |        |          |              |
| 3 | 350.05 | 47548      | 3.57       |        |          |              | 7 | 863.45 | 14334      | 1.08       |        |          |              |
| 4 | 421.20 | 1330263    | 100.00     |        |          |              |   |        |            |            |        |          |              |

**Figure S55: LC-MS chromatogram of (E)-2-((4-(3-(Piperidin-1-yl)propoxy)phenyl)diazanyl)phenyl)(pyrrolidin-1-yl)methanone (13)**

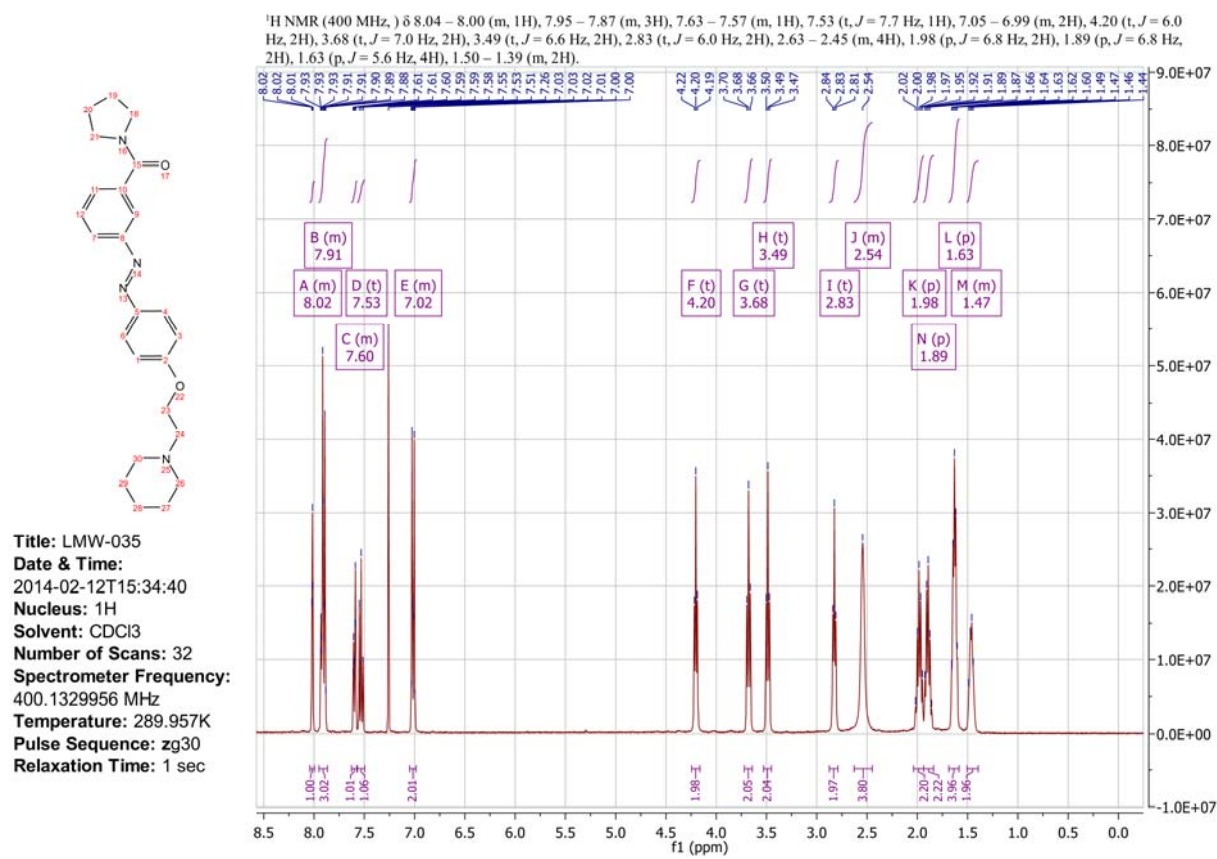

Figure S56: <sup>1</sup>H-NMR spectrum of (E)-3-((4-(2-(Piperidin-1-yl)ethoxy)phenyl)diazenyl)phenyl)(pyrrolidin-1-yl)methanone (14)

<sup>13</sup>C NMR (101 MHz, CDCl<sub>3</sub>) δ 169.18, 161.68, 152.51, 146.95, 138.19, 129.27, 129.01, 125.02, 124.34, 120.96, 114.96, 66.38, 57.90, 55.19, 49.78, 46.41, 26.54, 25.98, 24.61, 24.24.

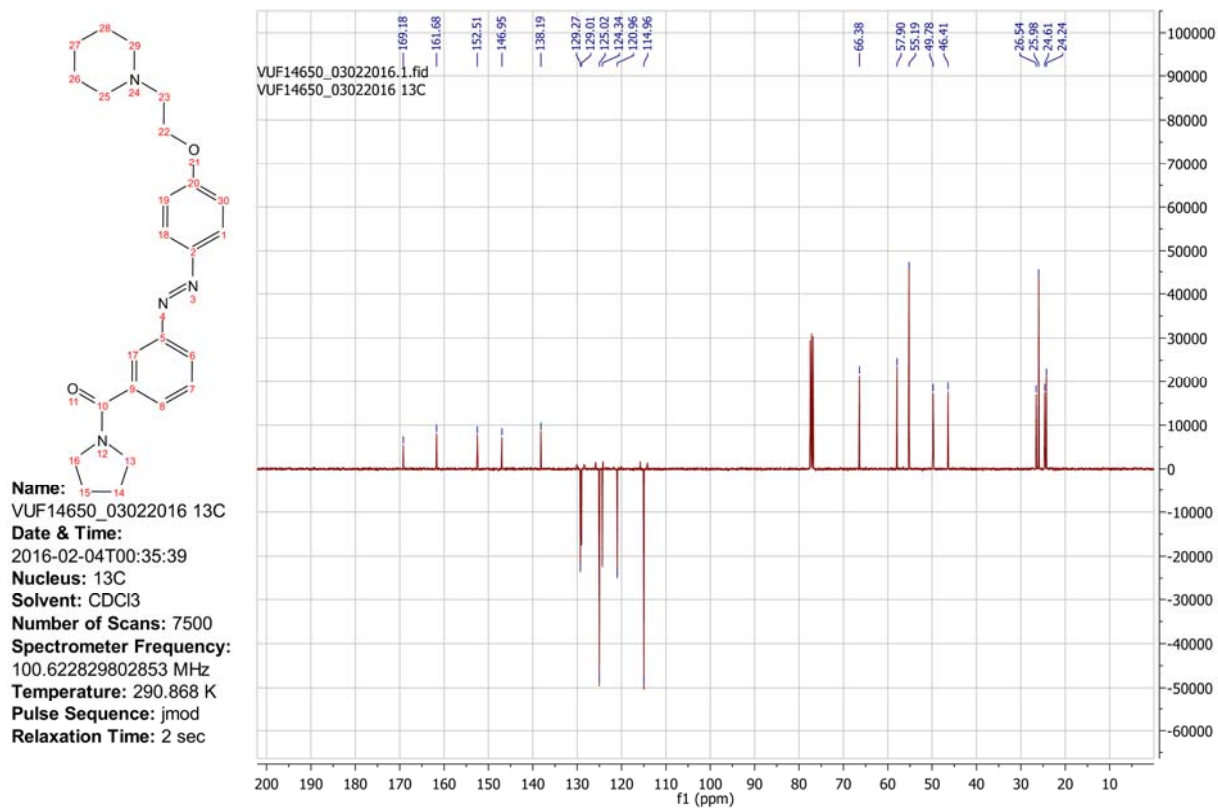

Figure S57: <sup>13</sup>C-NMR spectrum of (E)-3-((4-(2-(Piperidin-1-yl)ethoxy)phenyl)diazenyl)phenyl)(pyrrolidin-1-yl)methanone (**14**)

Acquired by : Admin  
 Date Acquired : 10/22/2014 2:43:46 PM  
 Sample Name : VUF14650\_D2\_22102014  
 Sample ID :  
 Tray# : 1  
 Vial# : 23  
 Injection Volume : 10  
 Data File : C:\LabSolutions\Data\2014\2014-wk43\VUF14650\_D2\_22102014.lcd  
 Background File : DMSOd6\_blanco\_D2\_22102014.lcd  
 Method File : Method SCAN ACID standard.azo.lcm  
 Report Format : DefaultL.CMS.lcr  
 Tuning File : C:\LabSolutions\Data\Installatie NOV 2009\Tuning ESI POS + NEG JAN2010.lct  
 Processed by : Admin  
 Modified Date : 10/27/2014 10:06:16 AM

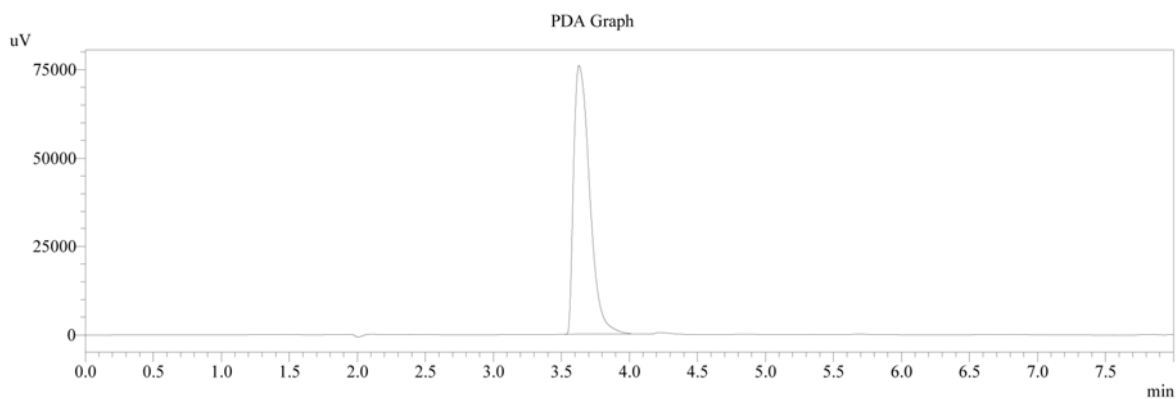

PDA Ch1 254nm 4nm

| Peak# | Name | Ret. Time | Area   | Area %  |
|-------|------|-----------|--------|---------|
| 1     |      | 3.625     | 624778 | 100.000 |

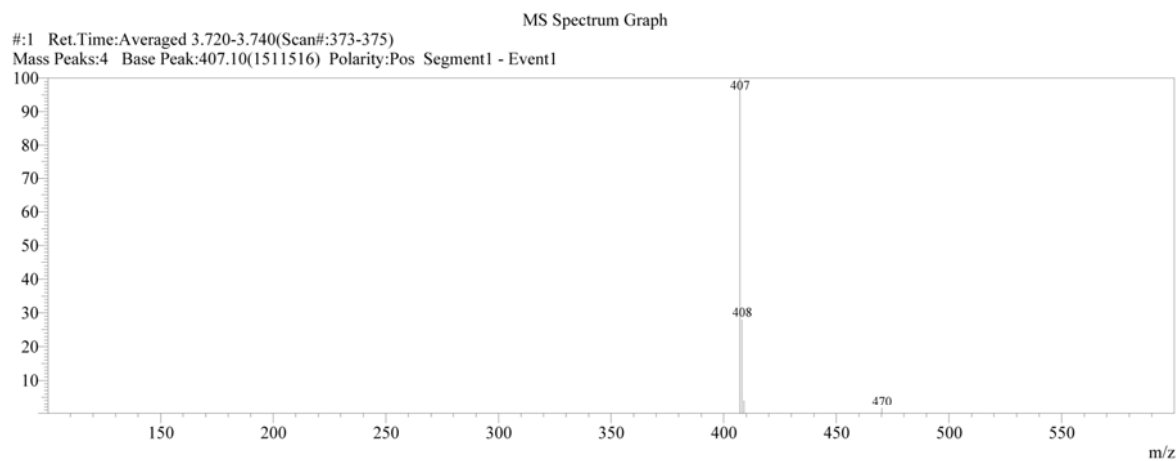

MS Spectrum Table

#:1 Ret.Time:  
 BG Mode:Calc 3.570<->4.100(358<->411)

| # | m/z    | Abs.Inten. | Rel.Inten. | Charge | Polarity | Monoisotopic | # | m/z    | Abs.Inten. | Rel.Inten. | Charge | Polarity | Monoisotopic |
|---|--------|------------|------------|--------|----------|--------------|---|--------|------------|------------|--------|----------|--------------|
| 1 | 407.10 | 1511516    | 100.00     |        |          |              | 3 | 409.05 | 61386      | 4.06       |        |          |              |
| 2 | 408.10 | 423644     | 28.03      |        |          |              | 4 | 470.15 | 23393      | 1.55       |        |          |              |

**Figure S58: LC-MS chromatogram of (E)-3-((4-(2-(Piperidin-1-yl)ethoxy)phenyl)diazenyl)phenyl)(pyrrolidin-1-yl)methanone (14)**



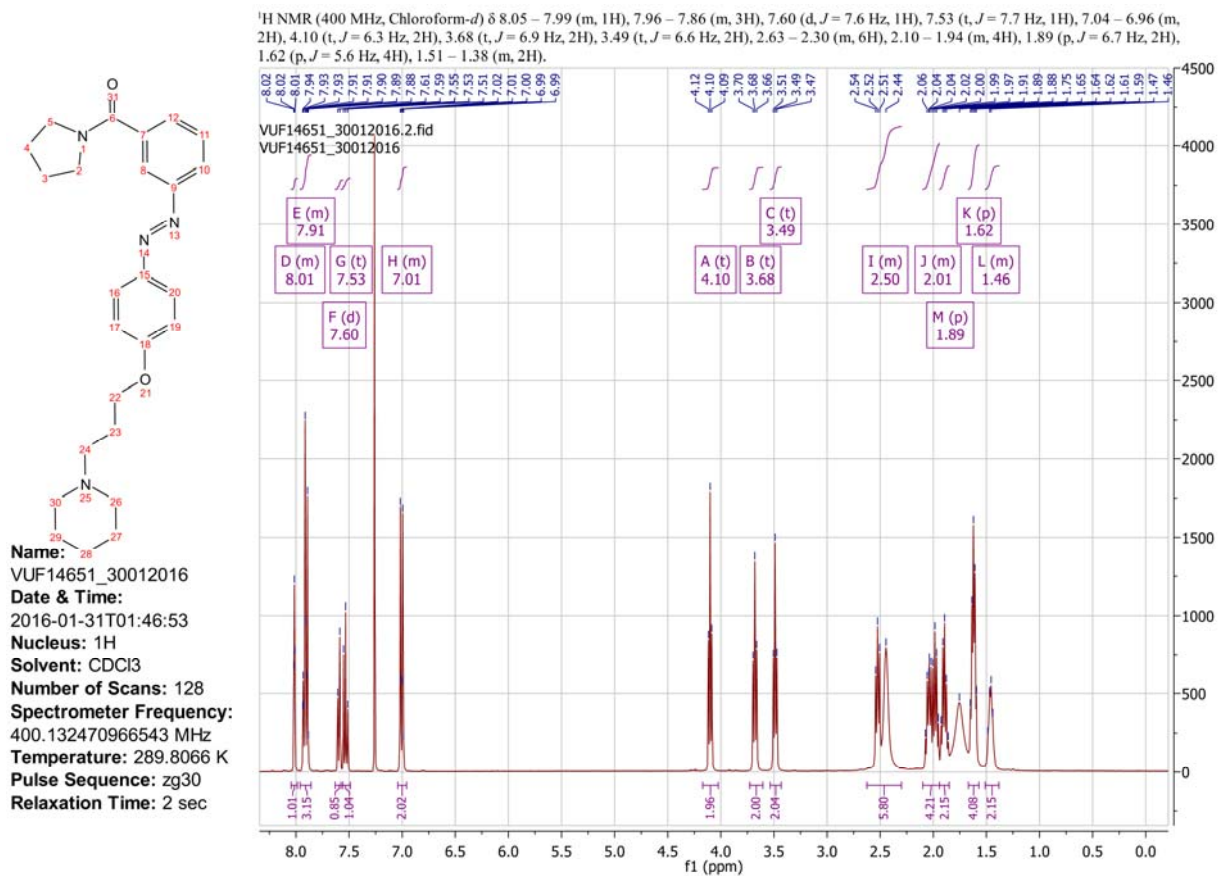

Figure S59: <sup>1</sup>H-NMR spectrum of (E)-3-((4-(3-(Piperidin-1-yl)propoxy)phenyl)diazenyl)phenyl)(pyrrolidin-1-yl)methanone (15)

<sup>13</sup>C NMR (101 MHz, CDCl<sub>3</sub>) δ 169.20, 161.96, 152.55, 146.89, 138.25, 129.28, 129.00, 125.05, 124.33, 120.98, 114.90, 66.97, 56.01, 54.77, 49.79, 46.42, 26.78, 26.57, 25.98, 24.64, 24.48.

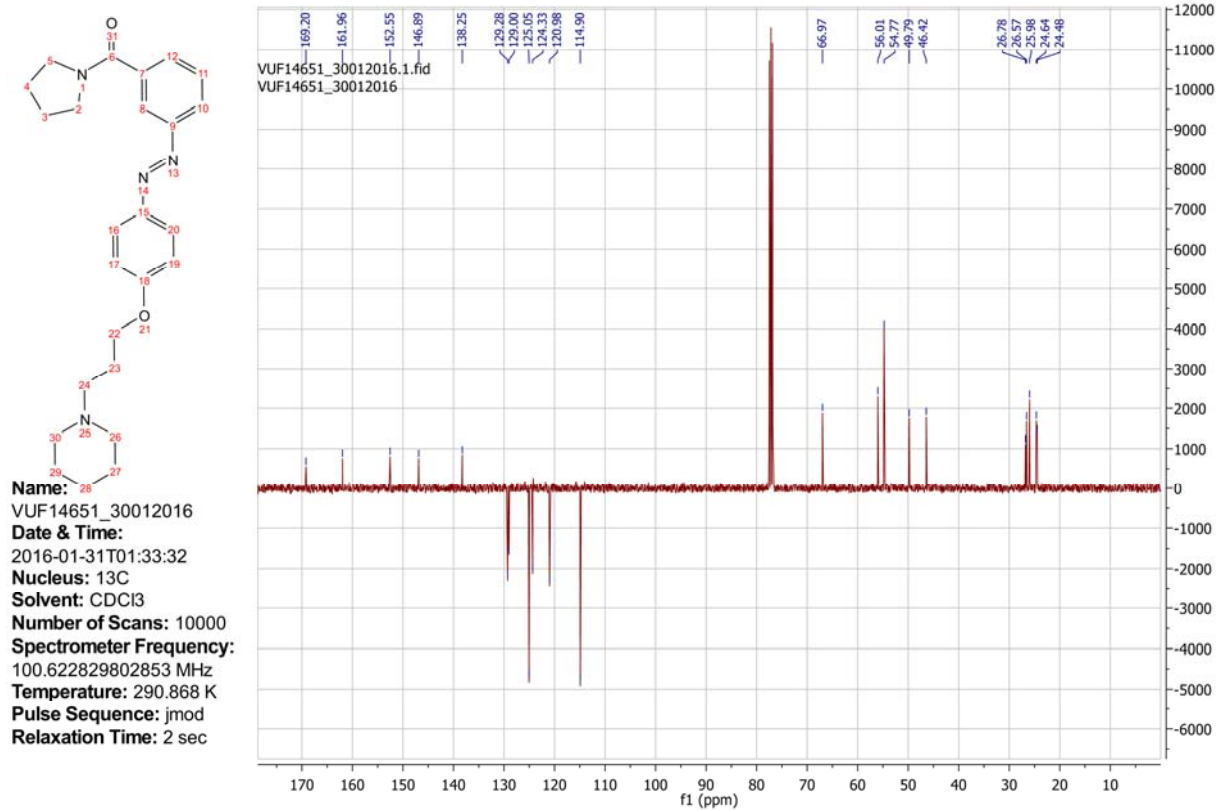

Figure S60: <sup>13</sup>C-NMR spectrum of (E)-3-((4-(3-(Piperidin-1-yl)propoxy)phenyl)diazenyl)phenyl)(pyrrolidin-1-yl)methanone (15)

Acquired by : Admin  
 Date Acquired : 1/28/2016 1:01:57 PM  
 Sample Name : VUF14651\_DARK\_28012015  
 Sample ID :  
 Tray# : 1  
 Vial# : 18  
 Injection Volume : 10  
 Data File : C:\LabSolutions\Data\2016\2016 - wk04\VUF14651\_DARK\_28012015.lcd  
 Background File : BLANCO\_DARK\_1\_28012015.lcd  
 Method File : Method SCAN ACID standard azo.lcm  
 Report Format : DefaultLCMS.lcr  
 Tuning File : C:\LabSolutions\Tuning File\Tuning-ESI-pos-neg01072015.lct  
 Processed by : Admin  
 Modified Date : 9/9/2016 4:09:54 PM

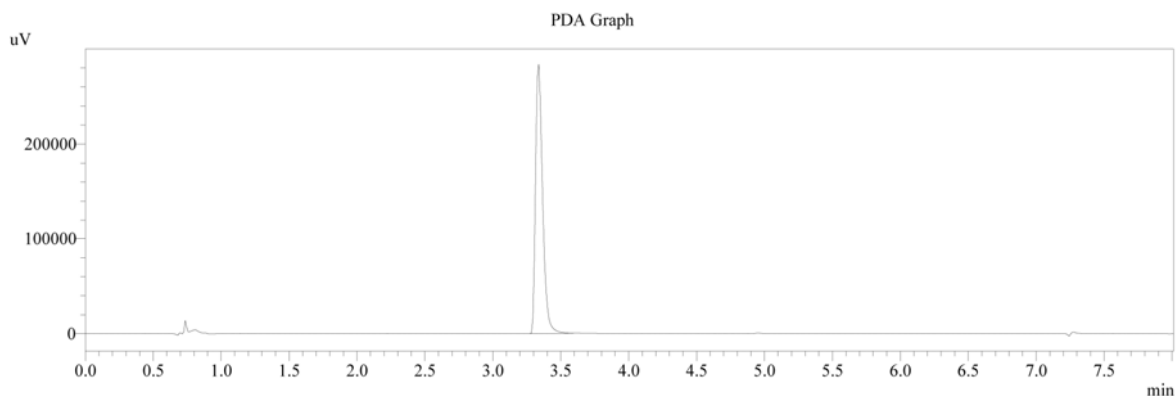

PDA Ch1 254nm 4nm

| Peak# | Name | Ret. Time | Area    | Area %  |
|-------|------|-----------|---------|---------|
| 1     |      | 3.331     | 1024665 | 100.000 |

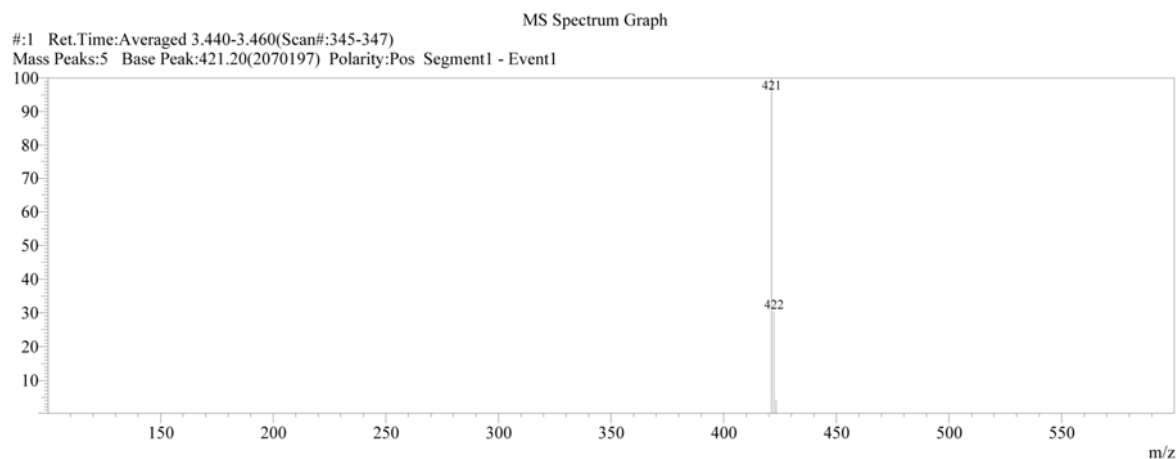

MS Spectrum Table

#:1 Ret.Time:  
 BG Mode:Calc 3.300<->3.670(331<->368)

| # | m/z    | Abs.Inten. | Rel.Inten. | Charge | Polarity | Monoisotopic | # | m/z    | Abs.Inten. | Rel.Inten. | Charge | Polarity | Monoisotopic |
|---|--------|------------|------------|--------|----------|--------------|---|--------|------------|------------|--------|----------|--------------|
| 1 | 421.20 | 2070197    | 100.00     |        |          |              | 4 | 863.35 | 22163      | 1.07       |        |          |              |
| 2 | 422.20 | 627485     | 30.31      |        |          |              | 5 | 864.35 | 33542      | 1.62       |        |          |              |
| 3 | 423.20 | 86274      | 4.17       |        |          |              |   |        |            |            |        |          |              |

**Figure S61: LC-MS chromatogram of (E)-3-((4-(3-(Piperidin-1-yl)propoxy)phenyl)diazanyl)phenyl)(pyrrolidin-1-yl)methanone (15)**

<sup>1</sup>H NMR (400 MHz, DMSO-*d*<sub>6</sub>) δ 7.95 – 7.87 (m, 4H), 7.68 – 7.60 (m, 2H), 7.20 – 7.12 (m, 2H), 4.19 (t, *J* = 5.8 Hz, 2H), 3.50 (t, *J* = 6.8 Hz, 2H), 3.42 (t, *J* = 6.4 Hz, 2H), 2.71 (bs, 2H), 2.46 (bs, 4H), 1.94 – 1.77 (m, 4H), 1.51 (p, *J* = 5.5 Hz, 4H), 1.43 – 1.33 (m, 2H).

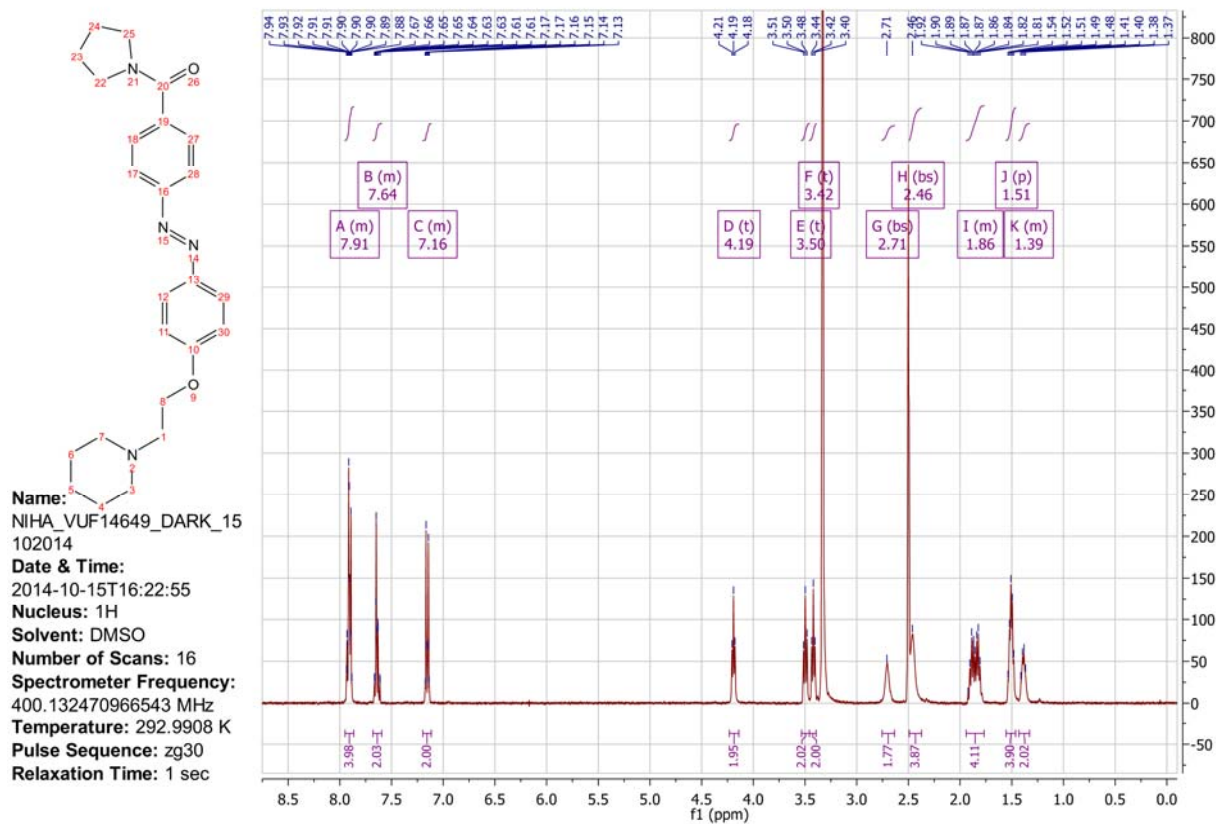

Figure S62: <sup>1</sup>H-NMR spectrum of (E)-4-((4-(2-(Piperidin-1-yl)ethoxy)phenyl)diazenyl)phenyl)(pyrrolidin-1-yl)methanone (16)

$^{13}\text{C}$  NMR (126 MHz, Chloroform-*d*)  $\delta$  169.21, 161.74, 153.41, 147.07, 138.75, 128.19, 125.10, 122.54, 114.99, 66.40, 57.90, 55.22, 49.74, 46.42, 26.59, 25.96, 24.61, 24.21.

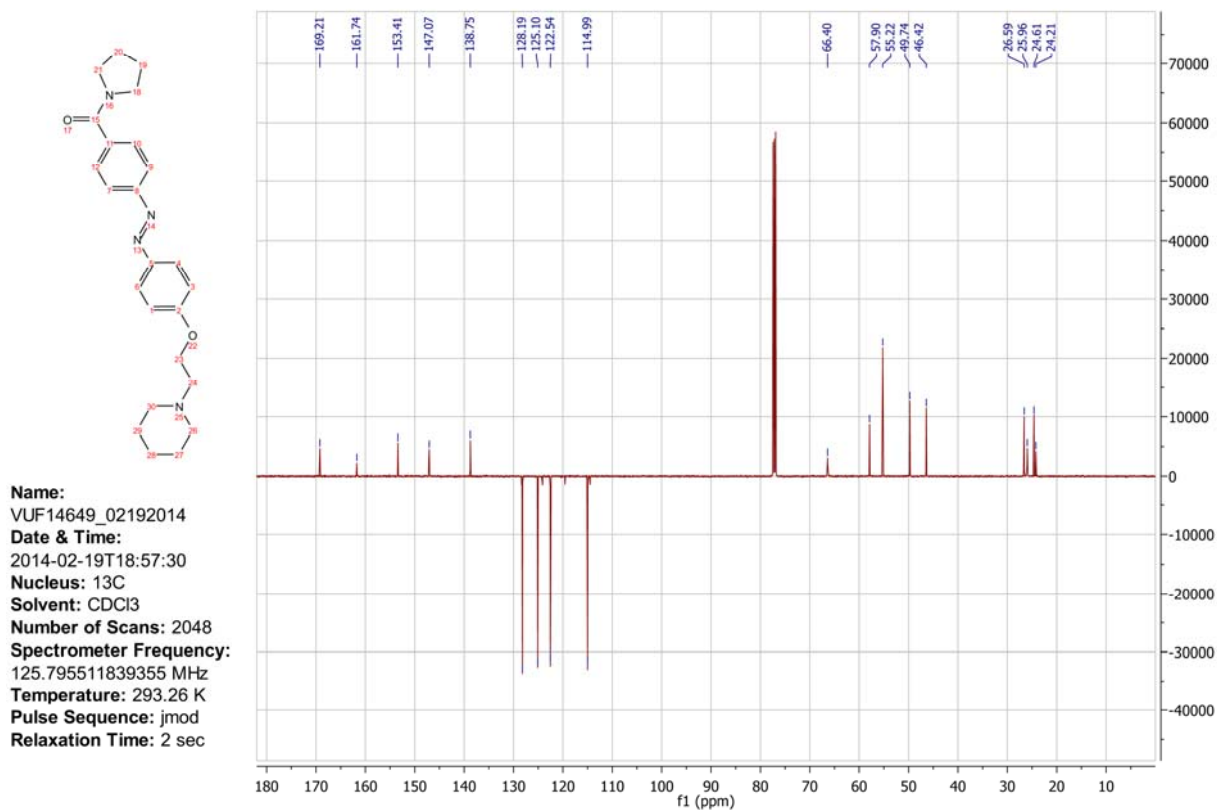

Figure S63:  $^{13}\text{C}$ -NMR spectrum of (E)-4-((4-(2-(Piperidin-1-yl)ethoxy)phenyl)diazenyl)phenyl)(pyrrolidin-1-yl)methanone (16)

Acquired by : Admin  
 Date Acquired : 3/12/2015 3:21:32 PM  
 Sample Name : NIHA\_VUF14649\_DARK\_12032015  
 Sample ID :  
 Tray# : 1  
 Vial# : 29  
 Injection Volume : 10  
 Data File : C:\LabSolutions\Data\2015\2015-wk10\NIHA\_VUF14649\_DARK\_12032015.lcd  
 Background File : NIHA\_blanco\_DARK\_12032015.lcd  
 Method File : Method SCAN ACID standard azo.lcm  
 Report Format : DefaultLCMS.lcr  
 Tuning File : C:\LabSolutions\Data\Installatie NOV 2009\Tuning ESI POS + NEG JAN2010.lct  
 Processed by : Admin  
 Modified Date : 9/9/2016 3:48:59 PM

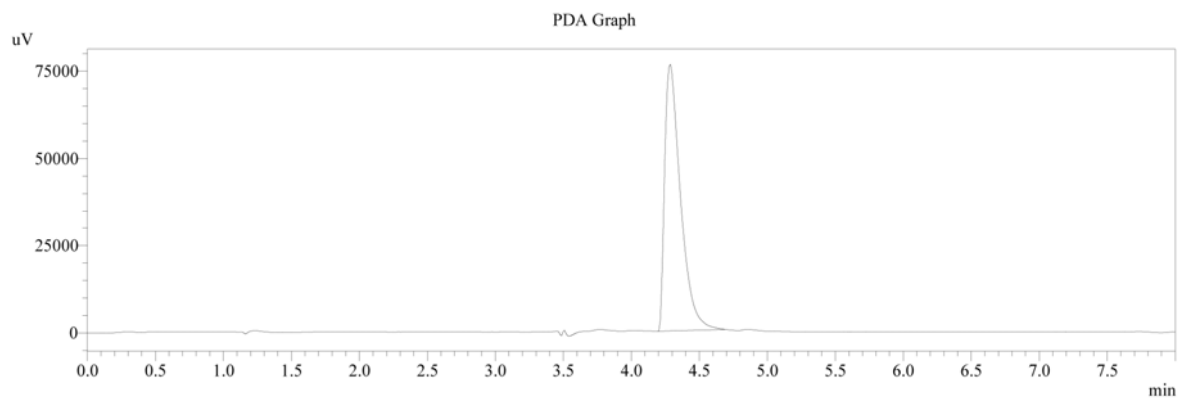

PDA Ch1 254nm 4nm

| Peak# | Name | Ret. Time | Area   | Area %  |
|-------|------|-----------|--------|---------|
| 1     |      | 4.280     | 619781 | 100.000 |

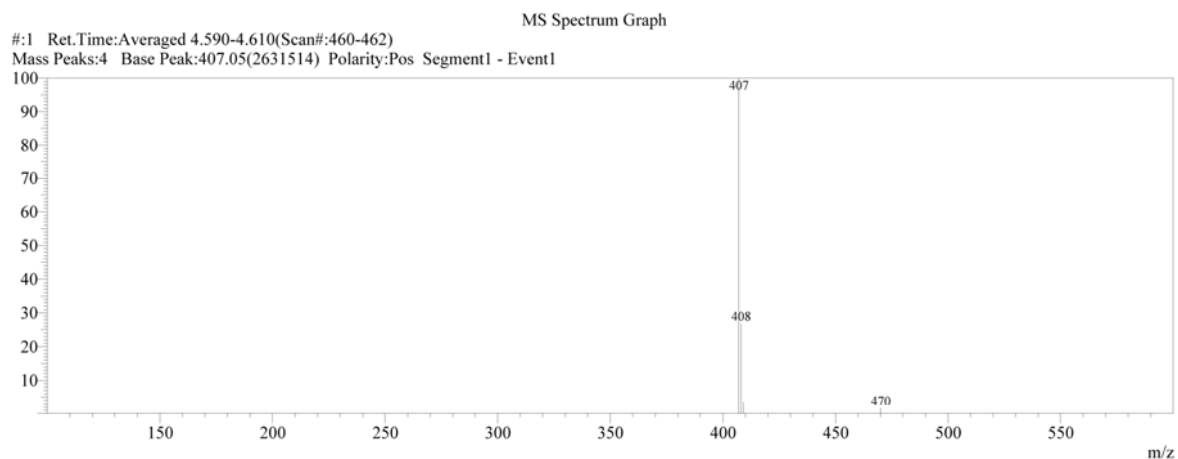

MS Spectrum Table

#1 Ret.Time:  
 BG Mode:Calc 4.370<->5.080(438<->509)

| # | m/z    | Abs.Inten. | Rel.Inten. | Charge | Polarity | Monoisotopic | # | m/z    | Abs.Inten. | Rel.Inten. | Charge | Polarity | Monoisotopic |
|---|--------|------------|------------|--------|----------|--------------|---|--------|------------|------------|--------|----------|--------------|
| 1 | 407.05 | 2631514    | 100.00     |        |          |              | 3 | 409.05 | 93984      | 3.57       |        |          |              |
| 2 | 408.05 | 705084     | 26.79      |        |          |              | 4 | 470.10 | 43322      | 1.65       |        |          |              |

**Figure S64: LC-MS chromatogram of (E)-4-((4-(2-(Piperidin-1-yl)ethoxy)phenyl)diazenyl)phenyl)(pyrrolidin-1-yl)methanone (16)**

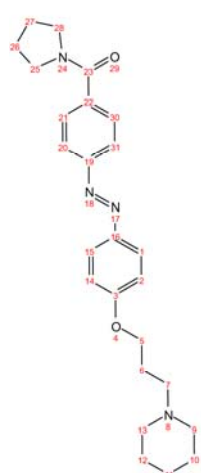

**Name:**  
 VUF14635\_15042016  
**Date & Time:**  
 2016-04-15T15:43:18  
**Nucleus:** 1H  
**Solvent:** CDCl3  
**Number of Scans:** 64  
**Spectrometer Frequency:**  
 500.273089372036 MHz  
**Temperature:** 296.16 K  
**Pulse Sequence:** zg30  
**Relaxation Time:** 1 sec

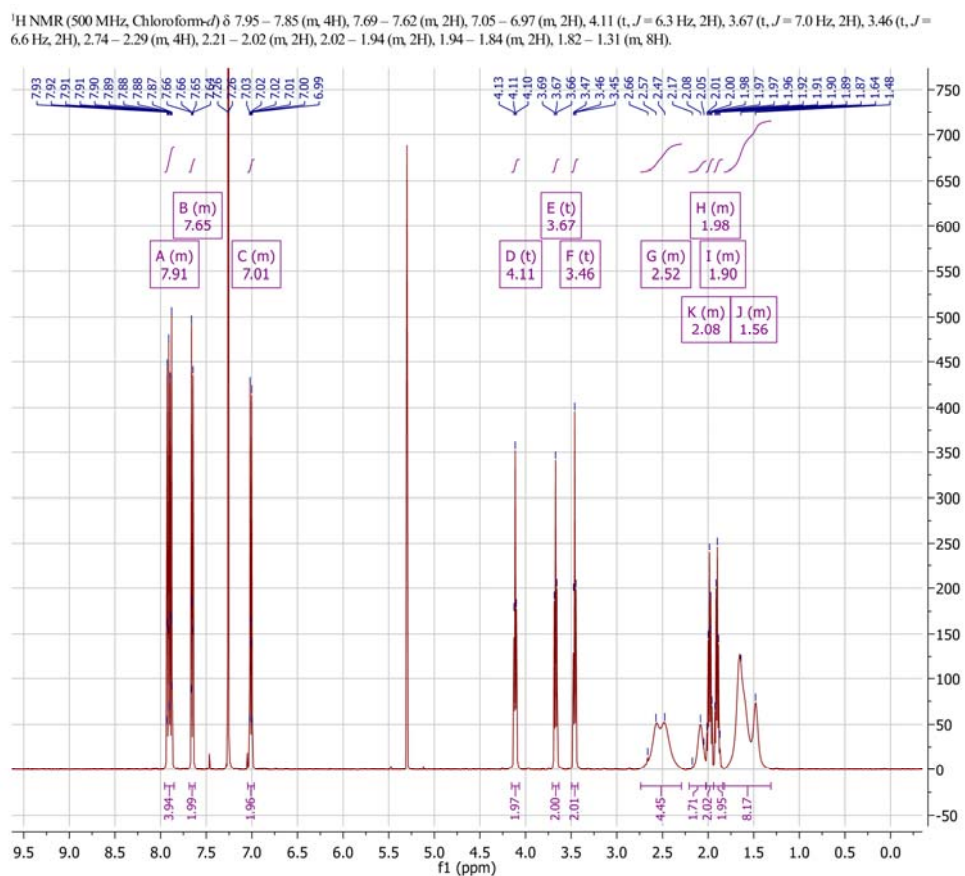

Figure S65: <sup>1</sup>H-NMR spectrum of (E)-4-((4-(2-(Piperidin-1-yl)propoxy)phenyl)diazenyl)phenyl)(pyrrolidin-1-yl)methanone (17)

<sup>13</sup>C NMR (101 MHz, CDCl<sub>3</sub>) δ 169.23, 162.07, 153.45, 146.98, 138.70, 128.19, 128.19, 125.11, 122.53, 114.92, 67.01, 56.01, 54.80, 49.74, 46.42, 26.84, 26.58, 26.05, 24.61, 24.52.

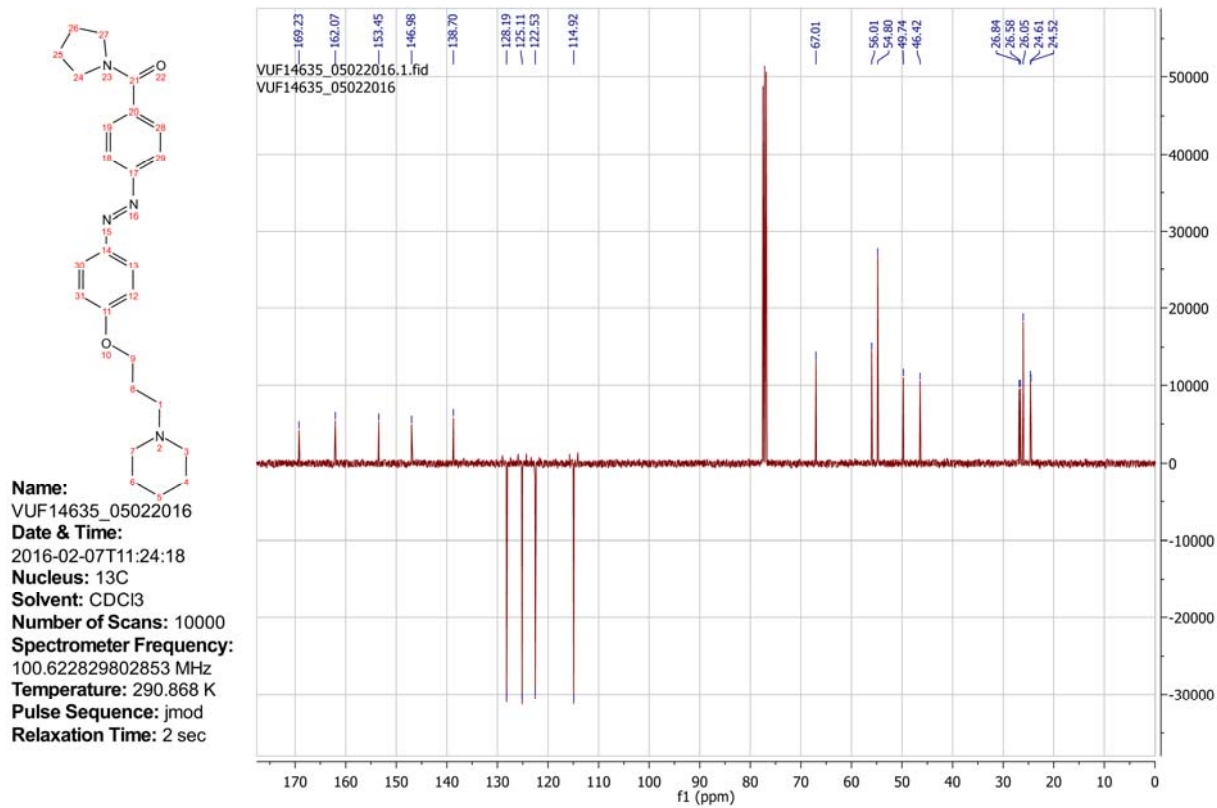

Figure S66: <sup>13</sup>C-NMR spectrum of (E)-4-((4-(2-(Piperidin-1-yl)propoxy)phenyl)diazenyl)phenyl)(pyrrolidin-1-yl)methanone (17)



Acquired by : Admin  
 Date Acquired : 2/12/2015 12:55:36 PM  
 Sample Name : NIHA\_VUF14635\_dark\_12022015  
 Sample ID :  
 Tray# : 1  
 Vial# : 7  
 Injection Volume : 10  
 Data File : C:\LabSolutions\Data\2015\2015-wk06\NIHA\_VUF14635\_dark\_12022015.lcd  
 Background File : NIHA\_blanco\_IRR\_12022015.lcd  
 Method File : Method SCAN ACID standard azo.lcm  
 Report Format : DefaultLCMS.lcr  
 Tuning File : C:\LabSolutions\Data\Installatie NOV 2009\Tuning ESI POS + NEG JAN2010.lct  
 Processed by : Admin  
 Modified Date : 2/13/2015 3:32:13 PM

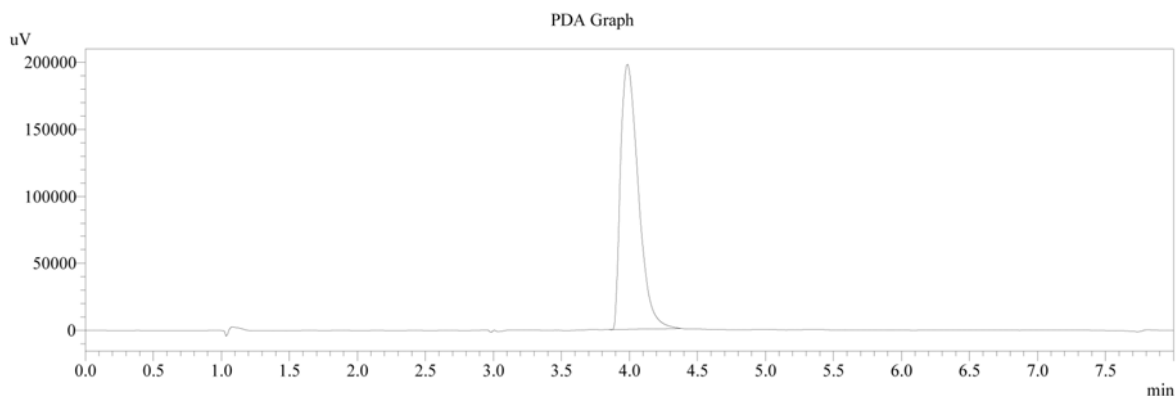

PDA Ch1 254nm 4nm

| Peak# | Name | Ret. Time | Area    | Area %  |
|-------|------|-----------|---------|---------|
| 1     |      | 3.980     | 1802470 | 100.000 |

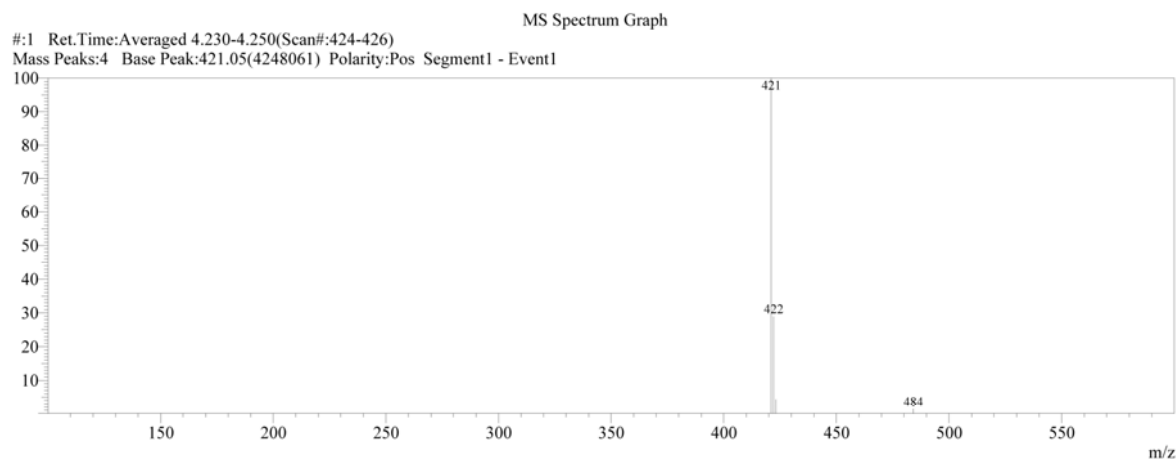

MS Spectrum Table

#:1 Ret.Time:  
 BG Mode:Calc 3.890<->4.830(390<->484)

| # | m/z    | Abs.Inten. | Rel.Inten. | Charge | Polarity | Monoisotopic | # | m/z    | Abs.Inten. | Rel.Inten. | Charge | Polarity | Monoisotopic |
|---|--------|------------|------------|--------|----------|--------------|---|--------|------------|------------|--------|----------|--------------|
| 1 | 421.05 | 4248061    | 100.00     |        |          |              | 3 | 423.10 | 186966     | 4.40       |        |          |              |
| 2 | 422.05 | 1231546    | 28.99      |        |          |              | 4 | 484.10 | 58394      | 1.37       |        |          |              |

**Figure S67: LC-MS chromatogram of (E)-4-((4-(2-(Piperidin-1-yl)propoxy)phenyl)diazanyl)phenyl)(pyrrolidin-1-yl)methanone (17)**

$^1\text{H}$  NMR (250 MHz, Chloroform- $d$ )  $\delta$  8.09 – 8.03 (m, 1H), 7.98 – 7.83 (m, 3H), 7.64 – 7.48 (m, 4H), 7.46 – 7.34 (m, 1H).

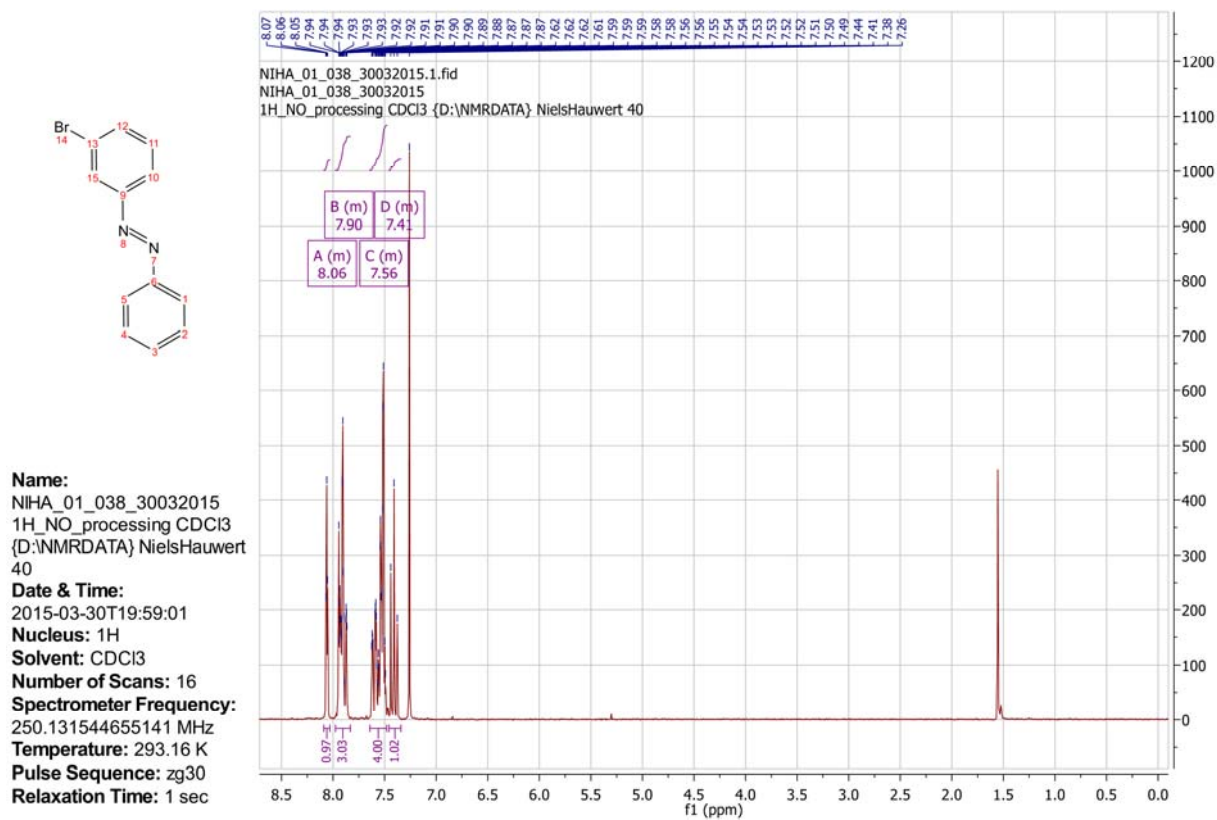

Figure S68:  $^1\text{H}$ -NMR spectrum of (E)-1-(3-bromophenyl)-2-phenyldiazene (20)

<sup>1</sup>H NMR (400 MHz, Chloroform-*d*) δ 7.98 – 7.93 (m, 1H), 7.86 – 7.79 (m, 2H), 7.63 – 7.57 (m, 1H), 7.57 – 7.47 (m, 3H), 7.39 (t, *J* = 7.9 Hz, 1H), 3.74 (t, *J* = 7.0 Hz, 2H), 3.09 (t, *J* = 6.7 Hz, 2H), 1.95 (p, *J* = 6.9 Hz, 2H), 1.82 (p, *J* = 6.7 Hz, 2H).

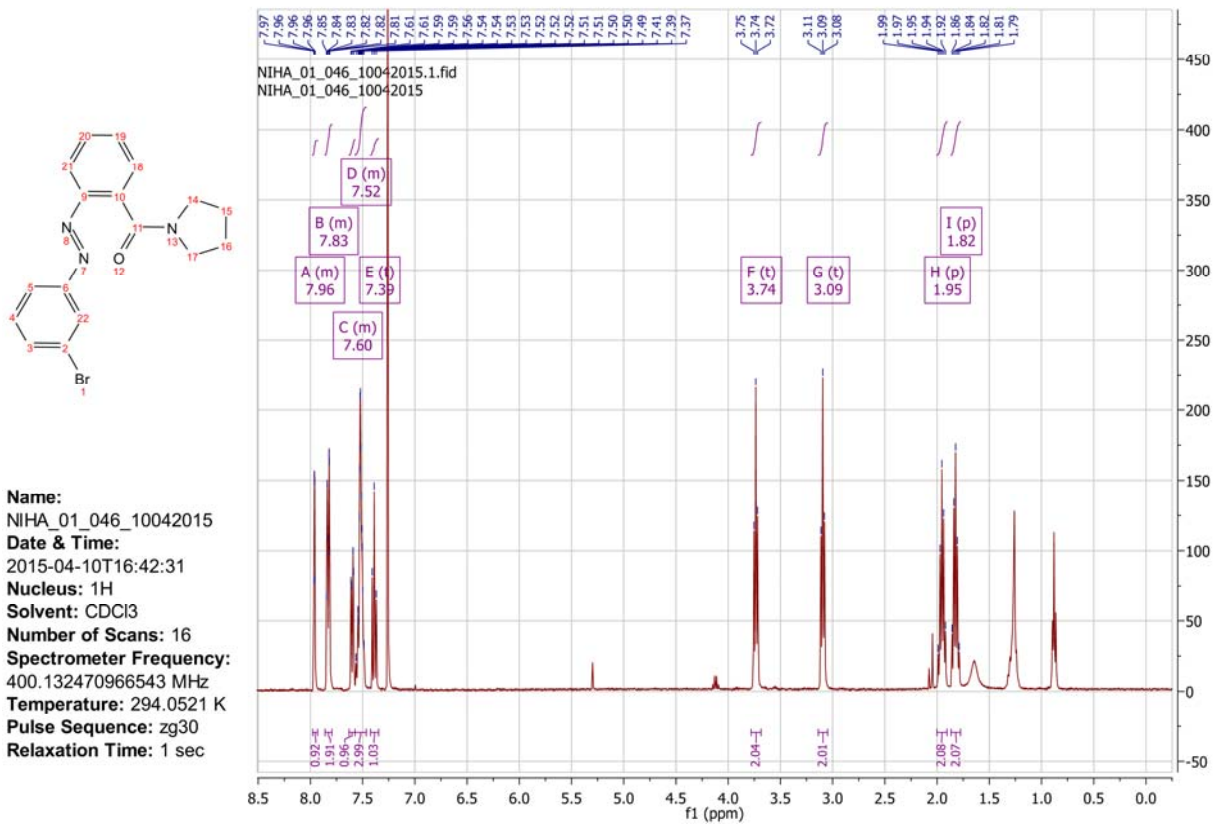

Figure S69: <sup>1</sup>H-NMR spectrum of (E)-2-((3-Bromophenyl)diazenyl)phenyl(pyrrolidin-1-yl)methanone (21)

<sup>1</sup>H NMR (400 MHz, Chloroform-*d*) δ 8.10 – 8.02 (m, 2H), 7.97 (dt, *J* = 7.9, 1.6 Hz, 1H), 7.88 (dt, *J* = 7.9, 1.3 Hz, 1H), 7.67 (dt, *J* = 7.6, 1.5 Hz, 1H), 7.65 – 7.52 (m, 2H), 7.41 (t, *J* = 7.9 Hz, 1H), 3.69 (t, *J* = 6.9 Hz, 2H), 3.49 (t, *J* = 6.6 Hz, 2H), 2.06 – 1.85 (m, 4H).

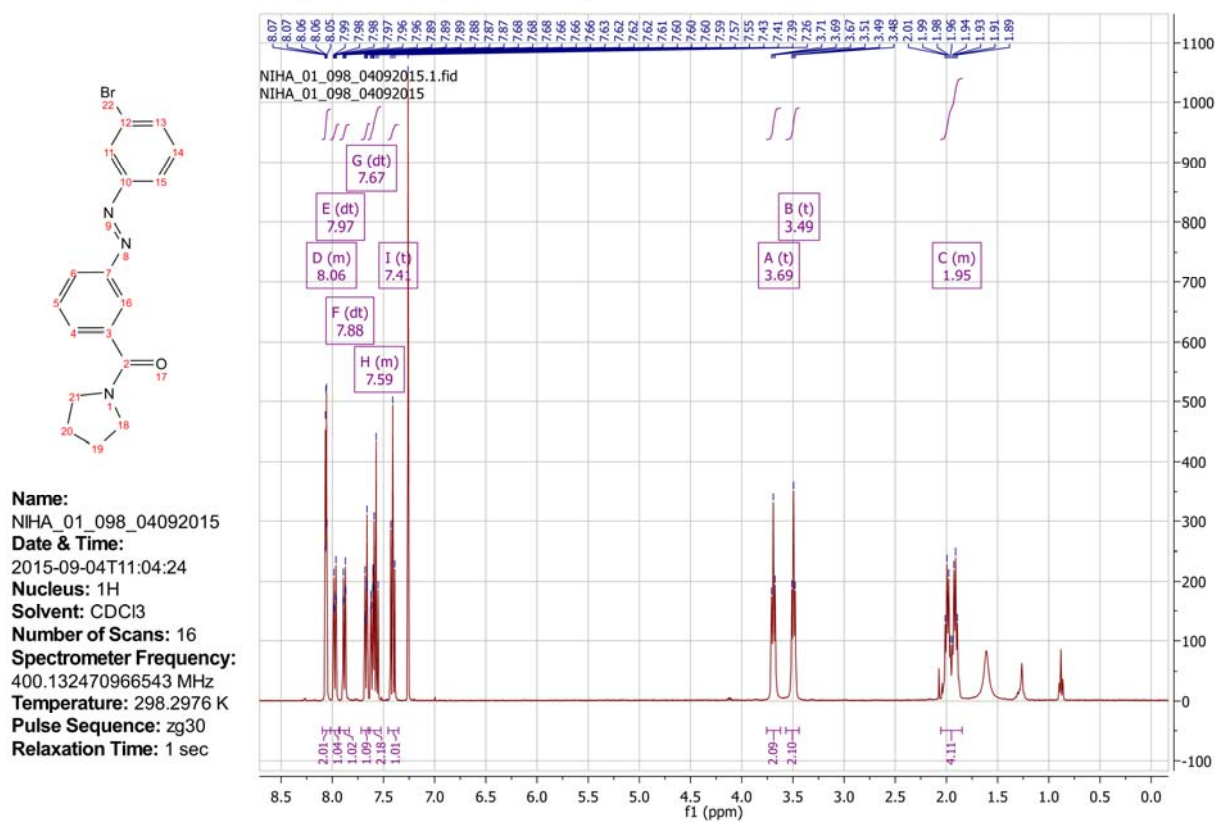

Figure S70: <sup>1</sup>H-NMR spectrum of (E)-3-((3-Bromophenyl)diazenyl)phenyl(pyrrolidin-1-yl)methanone (22)

<sup>1</sup>H NMR (400 MHz, Chloroform-*d*) δ 8.07 (t, *J* = 1.9 Hz, 1H), 7.97 – 7.92 (m, 2H), 7.92 – 7.87 (m, 1H), 7.71 – 7.65 (m, 2H), 7.64 – 7.60 (m, 1H), 7.42 (t, *J* = 7.9 Hz, 1H), 3.76 – 3.61 (m, 2H), 3.55 – 3.40 (m, 2H), 2.06 – 1.85 (m, 4H).

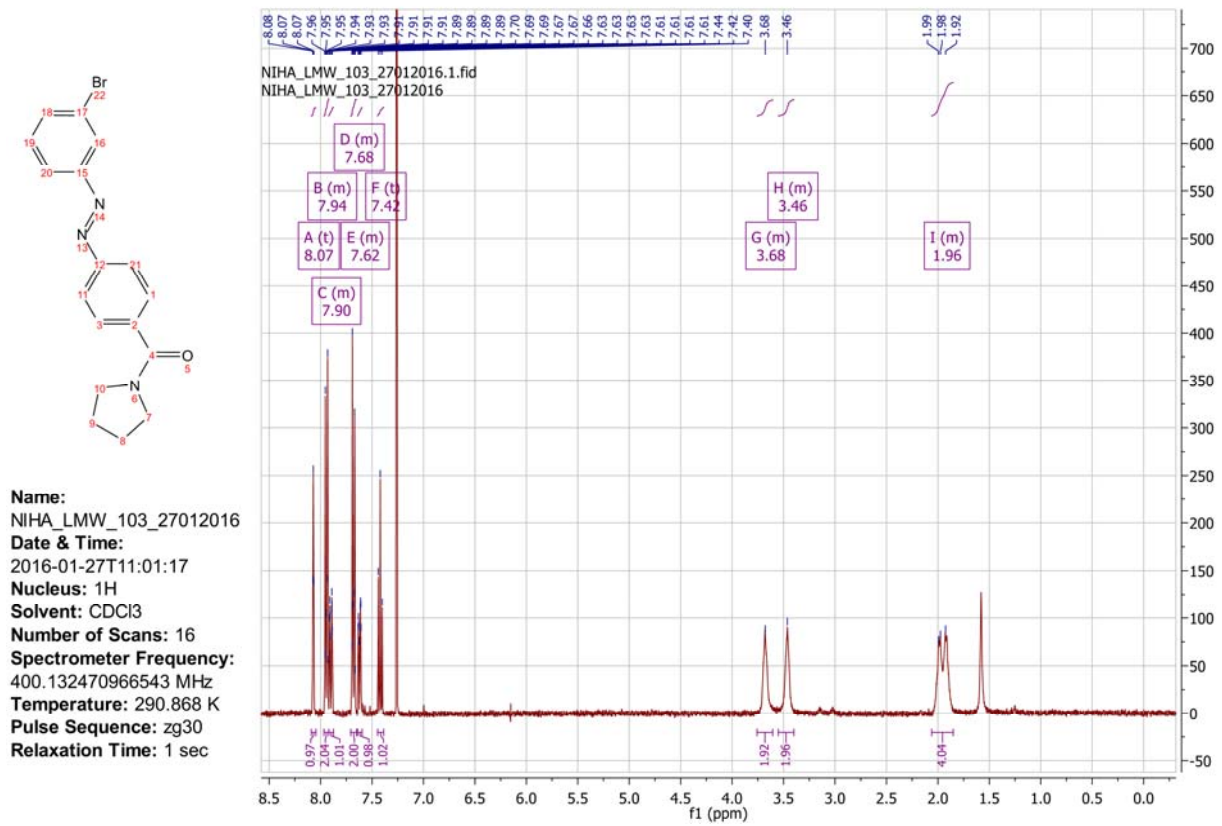

Figure S71: <sup>1</sup>H-NMR spectrum of (E)-4-((3-Bromophenyl)diazenyl)phenyl(pyrrolidin-1-yl)methanone (23)

<sup>1</sup>H NMR (500 MHz, Chloroform-*d*) δ 8.06 (t, *J* = 1.9 Hz, 1H), 7.99 – 7.93 (m, 1H), 7.84 – 7.76 (m, 2H), 7.69 – 7.61 (m, 3H), 7.56 (t, *J* = 7.7 Hz, 1H), 3.80 – 3.58 (m, 2H), 3.58 – 3.37 (m, 2H), 2.10 – 1.94 (m, 2H), 1.94 – 1.83 (m, 2H).

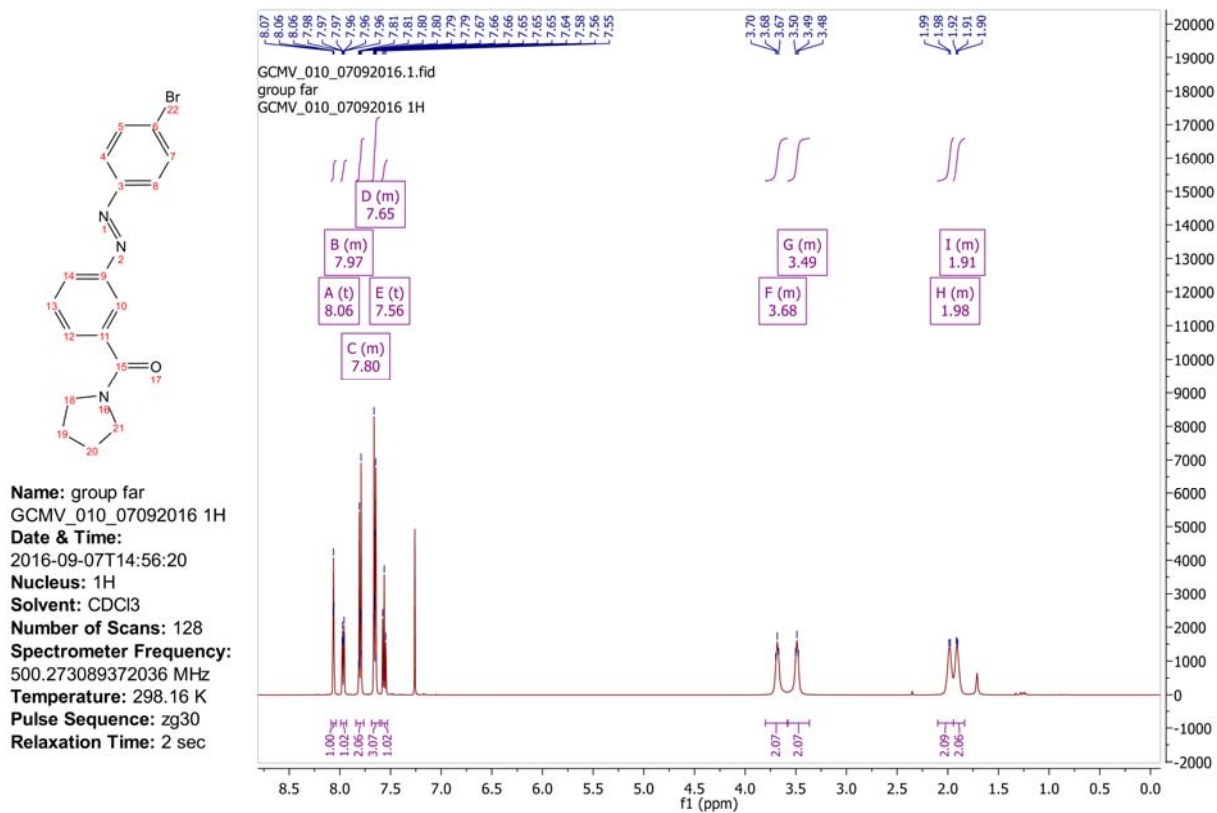

Figure S72: <sup>1</sup>H-NMR spectrum of (E)-3-((4-Bromophenyl)diazenyl)phenyl(pyrrolidin-1-yl)methanone (24)

<sup>1</sup>H NMR (500 MHz, DMSO-*d*<sub>6</sub>) δ 7.93 – 7.86 (m, 2H), 7.65 – 7.54 (m, 3H), 7.54 – 7.47 (m, 2H), 7.42 – 7.37 (m, 1H), 7.17 – 7.08 (m, 1H), 4.10 (t, *J* = 6.4 Hz, 2H), 2.39 (t, *J* = 7.1 Hz, 2H), 2.37 – 2.24 (m, 4H), 1.89 (p, *J* = 6.7 Hz, 2H), 1.49 (p, *J* = 5.6 Hz, 4H), 1.41 – 1.33 (m, 2H).

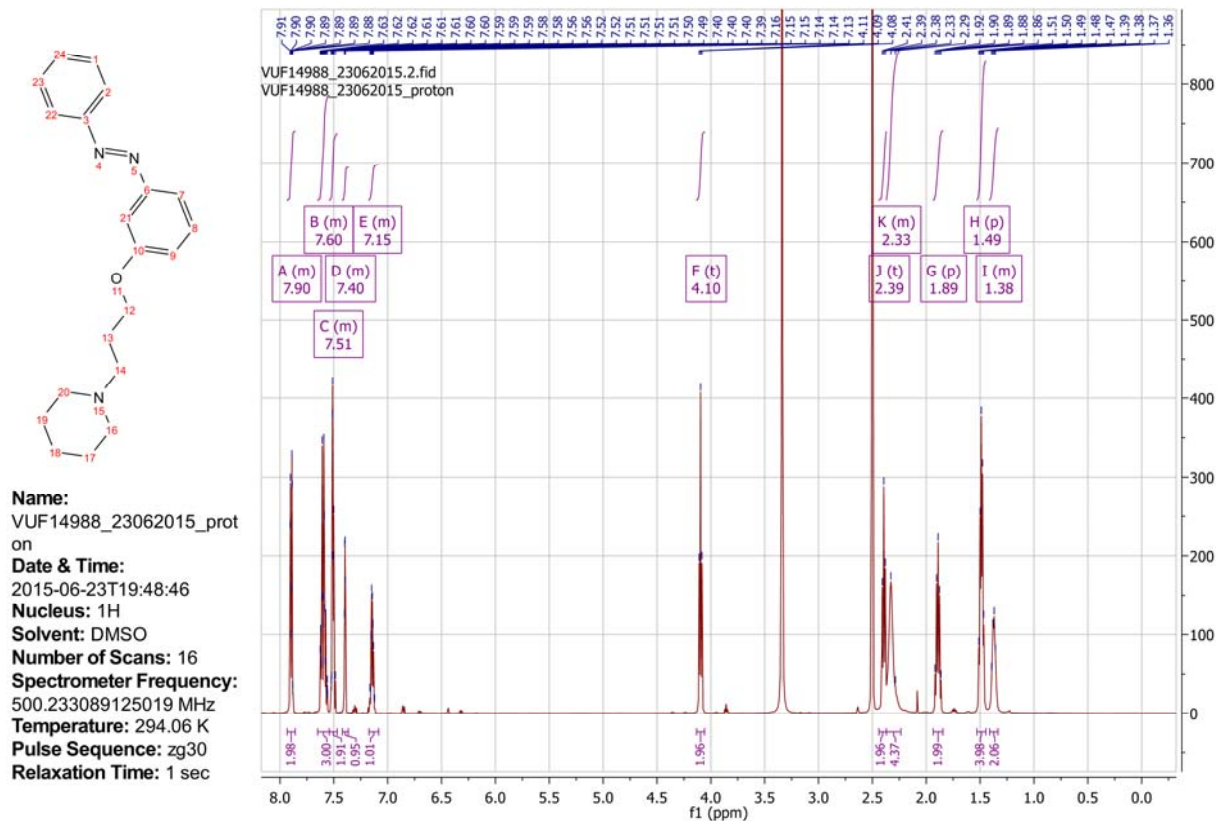

Figure S73: <sup>1</sup>H-NMR spectrum of (E)-1-(3-(3-(Phenyldiazenyl)phenoxy)propyl)piperidine (25)

$^{13}\text{C}$  NMR (126 MHz, DMSO)  $\delta$  159.50, 153.13, 151.83, 131.64, 130.32, 129.51, 122.60, 118.33, 116.44, 106.33, 66.28, 55.11, 54.15, 26.26, 25.64, 24.19.

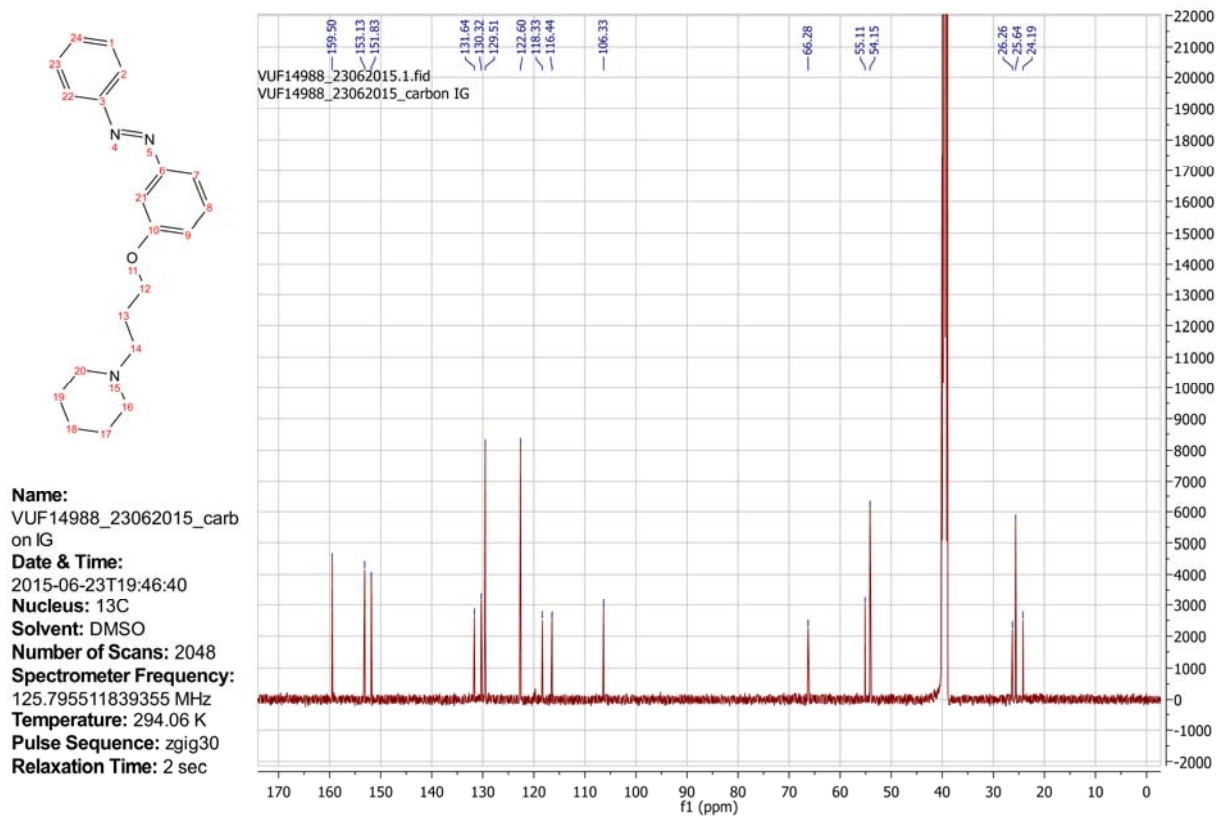

Figure S74:  $^{13}\text{C}$ -NMR spectrum of (E)-1-(3-(3-(Phenyldiazenyl)phenoxy)propyl)piperidine (25)



Acquired by : Admin  
 Date Acquired : 8/6/2015 12:35:36 PM  
 Sample Name : VUF14988\_DARK\_06082015  
 Sample ID :  
 Tray# : 1  
 Vial# : 13  
 Injection Volume : 10  
 Data File : C:\LabSolutions\Data\2015\2015-wk32\VUF14988\_DARK\_06082015.lcd  
 Background File : BLANCO\_IRRA\_2\_06082015.lcd  
 Method File : Method SCAN ACID standard azo.lcm  
 Report Format : DefaultLCMS.lcr  
 Tuning File : C:\LabSolutions\Tuning File\Tuning-ESI-pos-neg01072015.lct  
 Processed by : Admin  
 Modified Date : 9/9/2016 7:46:42 PM

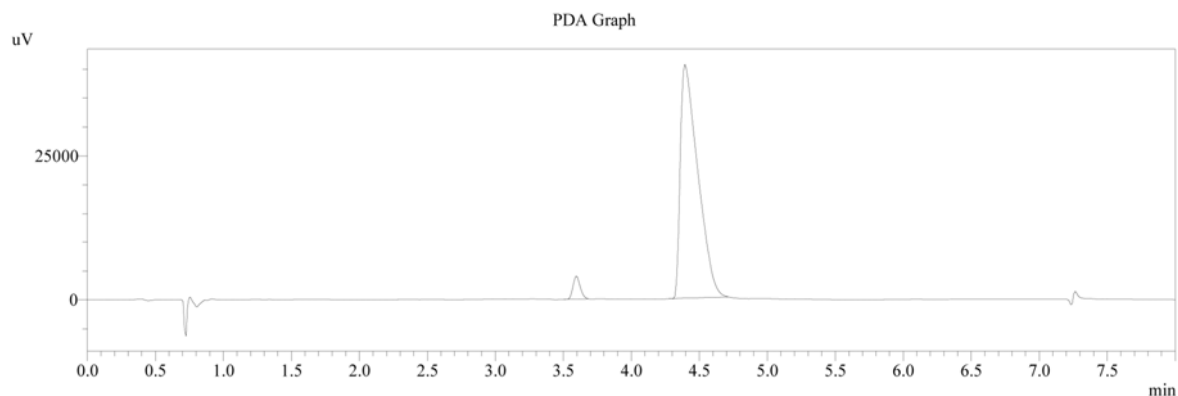

PDA Ch1 254nm 4nm

| Peak# | Name | Ret. Time | Area   | Area % |
|-------|------|-----------|--------|--------|
| 1     |      | 3.591     | 14810  | 3.910  |
| 2     |      | 4.391     | 364012 | 96.090 |

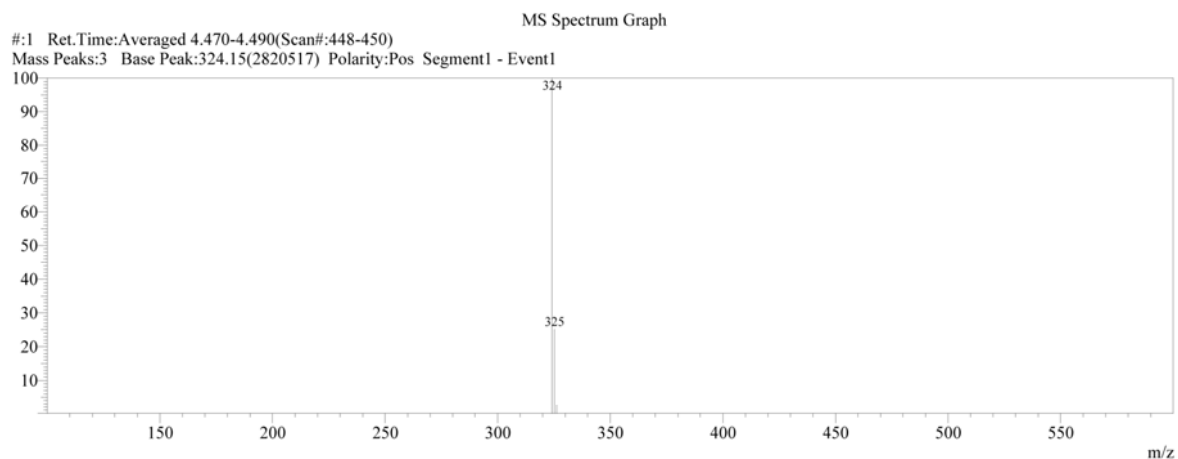

MS Spectrum Table

#1 Ret.Time:  
 BG Mode:Calc 4.350<->4.850(436<->486)

| # | m/z    | Abs.Inten. | Rel.Inten. | Charge | Polarity | Monoisotopic | # | m/z    | Abs.Inten. | Rel.Inten. | Charge | Polarity | Monoisotopic |
|---|--------|------------|------------|--------|----------|--------------|---|--------|------------|------------|--------|----------|--------------|
| 1 | 324.15 | 2820517    | 100.00     |        |          |              | 3 | 326.15 | 76056      | 2.70       |        |          |              |
| 2 | 325.15 | 711354     | 25.22      |        |          |              |   |        |            |            |        |          |              |

Figure S75: LC-MS chromatogram of (E)-1-(3-(3-(Phenyldiazenyl)phenoxy)propyl)piperidine (25)

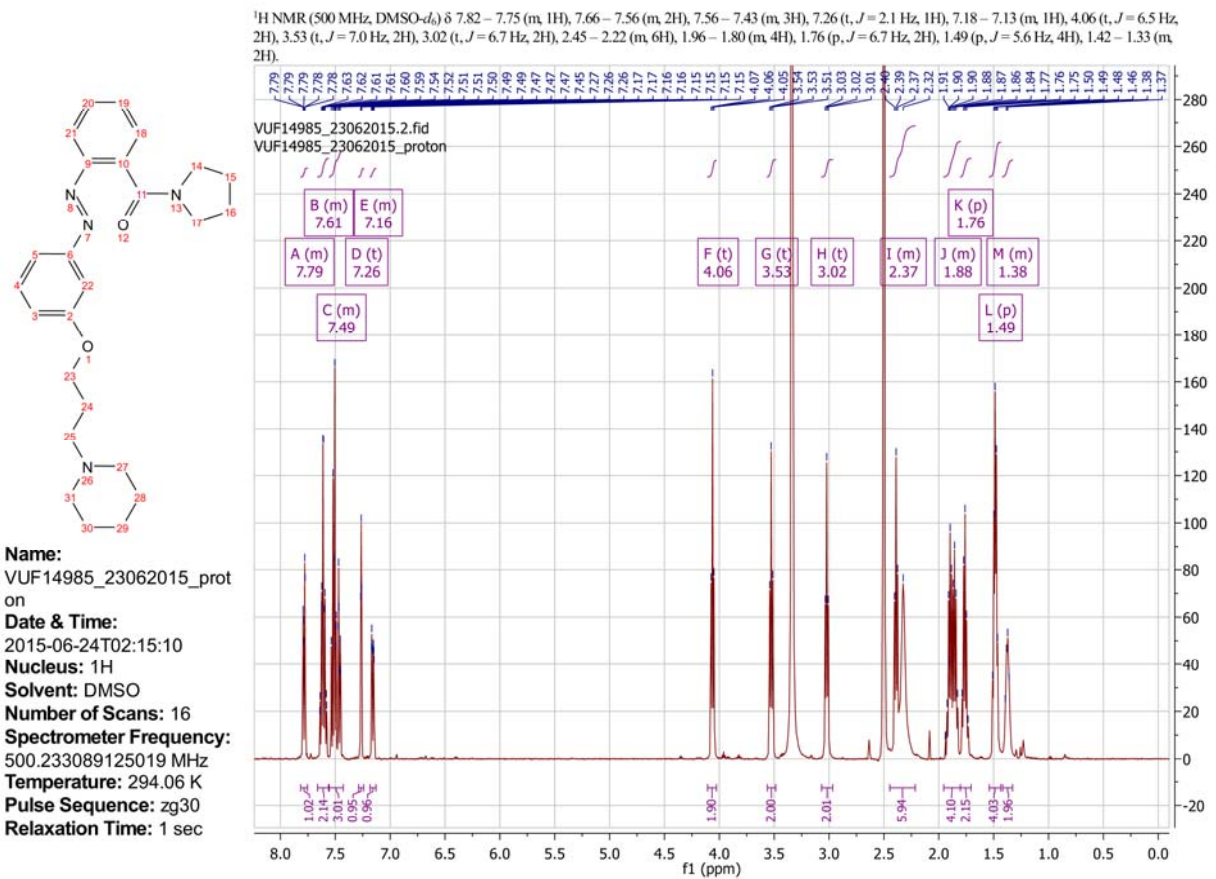

Figure S76: <sup>1</sup>H-NMR spectrum of (E)-2-((3-(3-(Piperidin-1-yl)propoxy)phenyl)diazanyl)phenyl)(pyrrolidin-1-yl)methanone (26)

<sup>13</sup>C NMR (126 MHz, DMSO) δ 166.88, 159.48, 153.10, 147.16, 136.93, 131.89, 130.51, 129.74, 127.46, 119.01, 117.49, 117.30, 105.21, 66.18, 55.06, 54.16, 47.83, 45.29, 26.19, 25.62, 25.55, 24.27, 24.18.

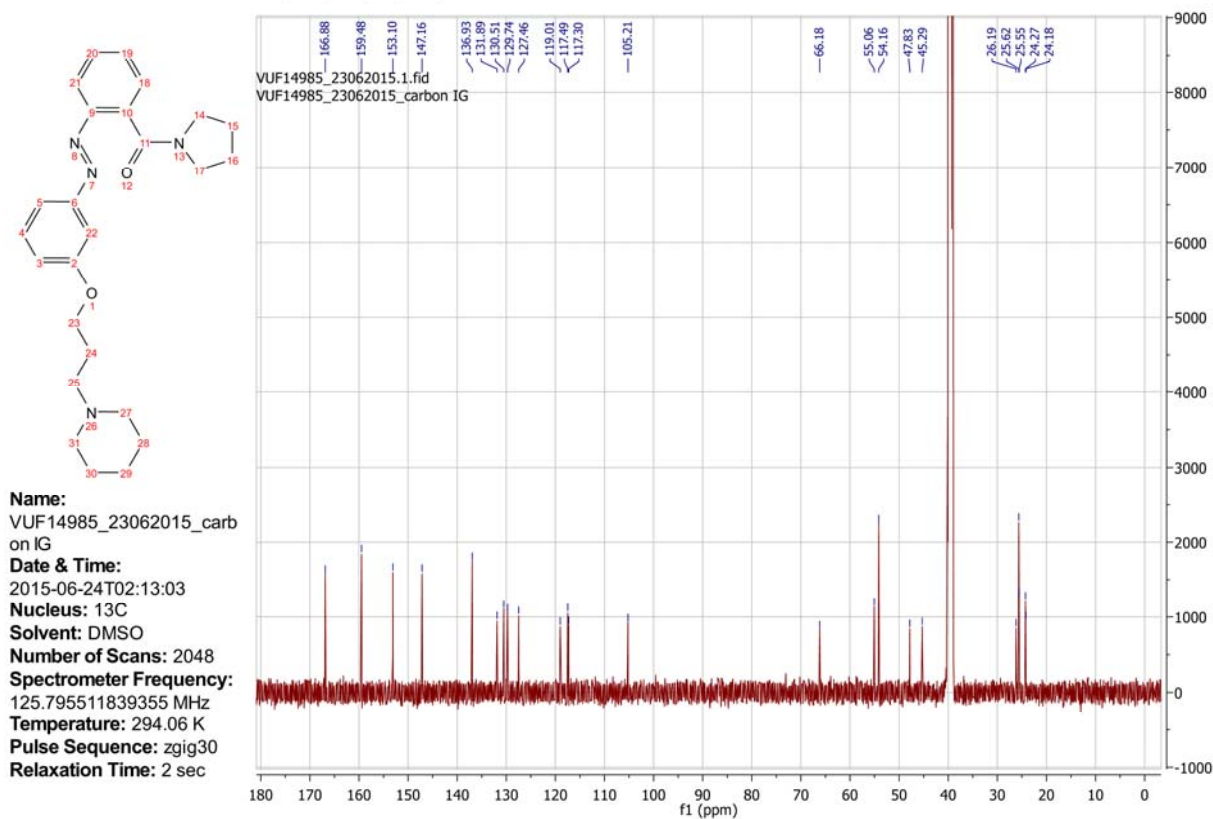

Figure S77: <sup>13</sup>C-NMR spectrum of (E)-2-((3-(3-(Piperidin-1-yl)propoxy)phenyl)diazanyl)phenyl)(pyrrolidin-1-yl)methanone (26)

Acquired by : Admin  
 Date Acquired : 5/28/2015 11:24:34 AM  
 Sample Name : VUF14985\_DARK\_28052015  
 Sample ID :  
 Tray# : 1  
 Vial# : 22  
 Injection Volume : 10  
 Data File : C:\LabSolutions\Data\2015\2015-wk22\VUF14985\_DARK\_28052015.lcd  
 Background File : Blanco\_IRRA2\_28052015.lcd  
 Method File : Method\_SCAN\_ACID\_standard\_azo.lcm  
 Report Format : DefaultLCMS.lcr  
 Tuning File : C:\LabSolutions\Data\Installatie NOV 2009\Tuning ESI POS + NEG JAN2010.lct  
 Processed by : Admin  
 Modified Date : 2/4/2016 2:55:21 PM

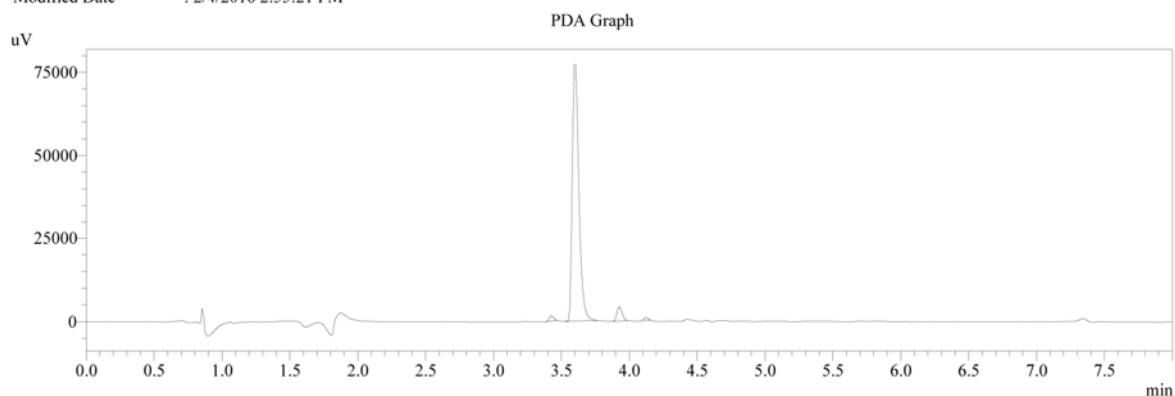

PDA Ch1 254nm 4nm

| Peak# | Name | Ret. Time | Area   | Area % |
|-------|------|-----------|--------|--------|
| 1     |      | 3.421     | 3665   | 1.309  |
| 2     |      | 3.595     | 263105 | 93.939 |
| 3     |      | 3.921     | 11575  | 4.133  |
| 4     |      | 4.117     | 1736   | 0.620  |

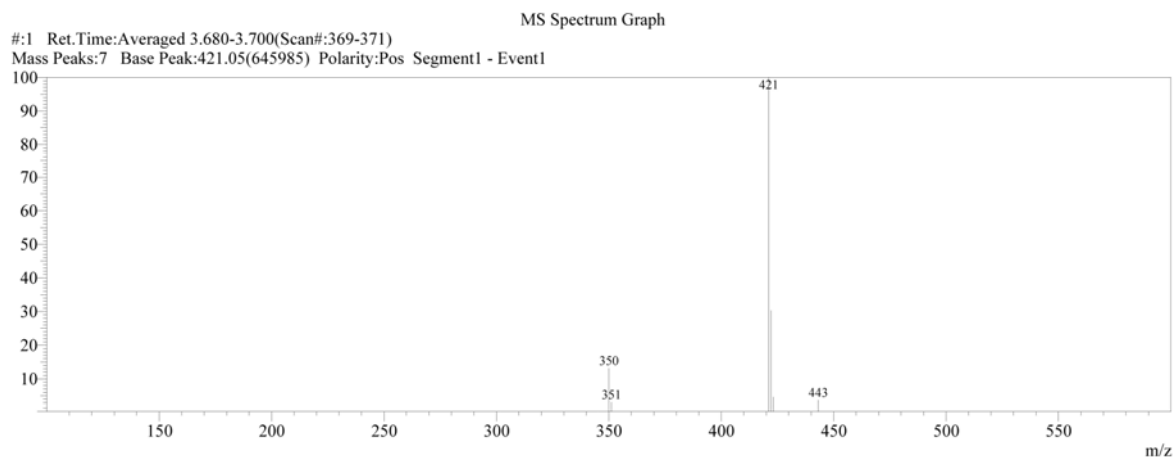

MS Spectrum Table

#1 Ret.Time:  
 BG Mode:Calc 3.580<->3.910(359<->392)  
 Mass Peaks:7 Base Peak:421.05(645985) Polarity:Pos Segment1 - Event

| # | m/z    | Abs.Inten. | Rel.Inten. | Charge | Polarity | Monoisotopic | # | m/z    | Abs.Inten. | Rel.Inten. | Charge | Polarity | Monoisotopic |
|---|--------|------------|------------|--------|----------|--------------|---|--------|------------|------------|--------|----------|--------------|
| 1 | 350.00 | 85374      | 13.22      |        |          |              | 5 | 423.10 | 29907      | 4.63       |        |          |              |
| 2 | 351.05 | 20253      | 3.14       |        |          |              | 6 | 443.10 | 24270      | 3.76       |        |          |              |
| 3 | 421.05 | 645985     | 100.00     |        |          |              | 7 | 863.45 | 10037      | 1.55       |        |          |              |
| 4 | 422.10 | 196135     | 30.36      |        |          |              |   |        |            |            |        |          |              |

Figure S78: LC-MS chromatogram of (E)-2-((3-(3-(Piperidin-1-yl)propoxy)phenyl)diazanyl)phenyl)(pyrrolidin-1-yl)methanone (26)

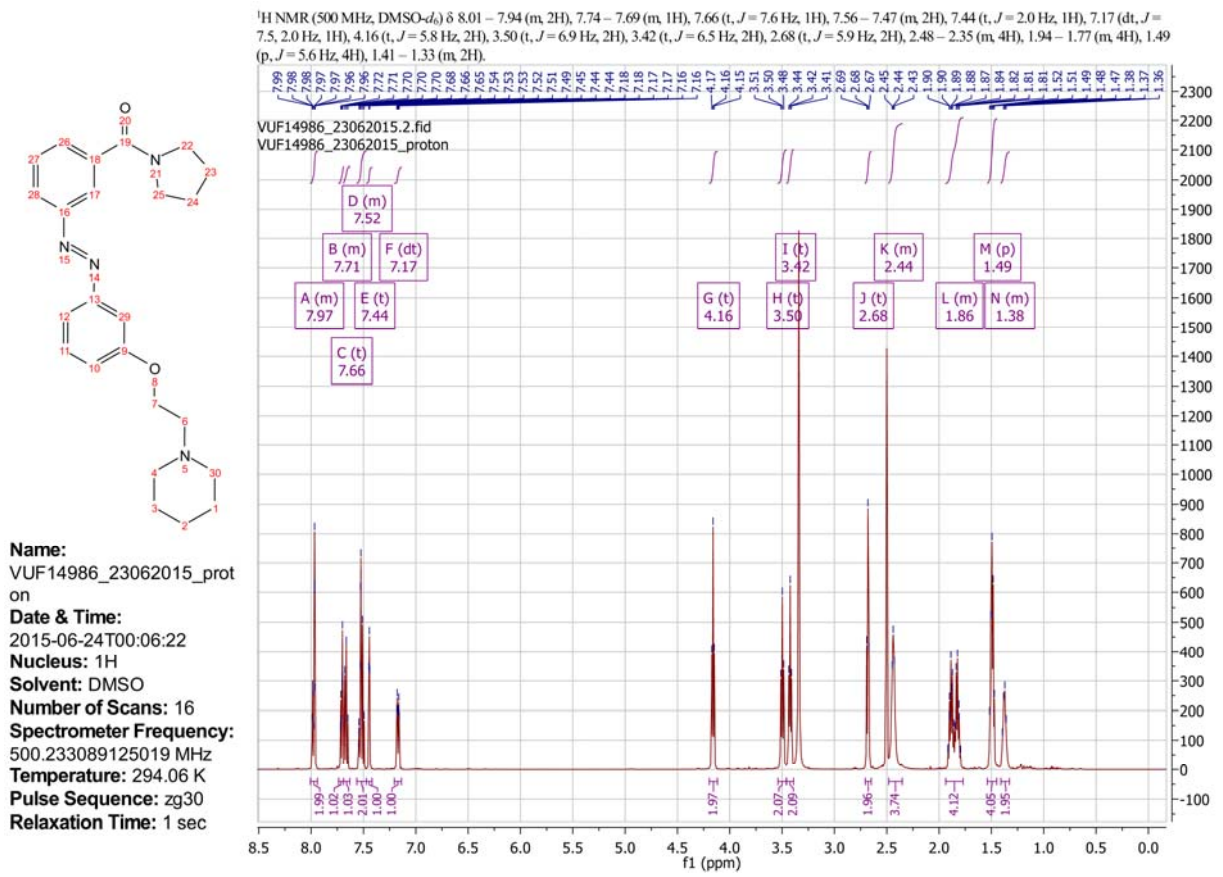

Figure S79: <sup>1</sup>H-NMR spectrum of (E)-3-((3-(2-(Piperidin-1-yl)ethoxy)phenyl)diazenyl)phenyl)(pyrrolidin-1-yl)methanone (27)

<sup>13</sup>C NMR (126 MHz, DMSO) δ 167.27, 159.37, 153.05, 151.51, 138.49, 130.33, 129.87, 129.59, 124.19, 120.54, 118.61, 116.52, 106.70, 65.96, 57.36, 54.44, 48.96, 46.03, 26.00, 25.62, 23.97.

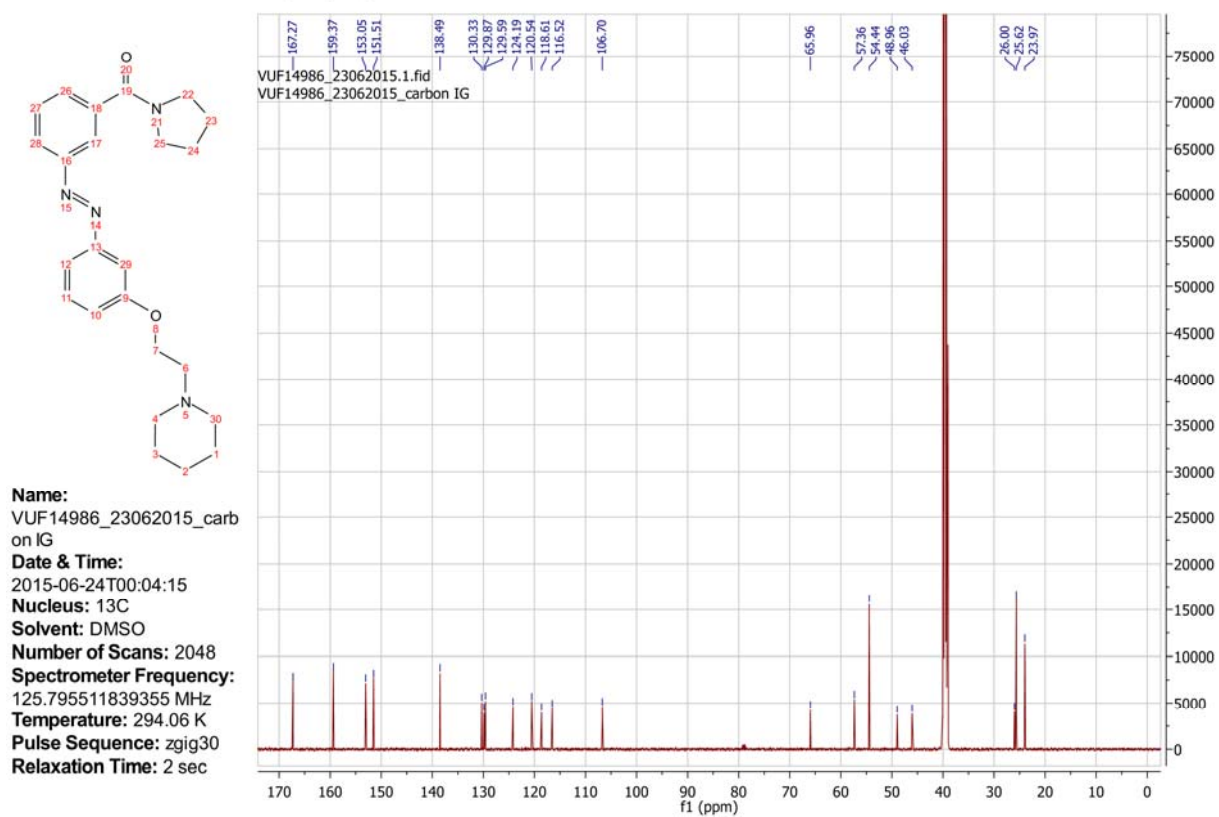

Figure S80: <sup>13</sup>C-NMR spectrum of (E)-3-((3-(2-(Piperidin-1-yl)ethoxy)phenyl)diazenyl)phenyl)(pyrrolidin-1-yl)methanone (27)

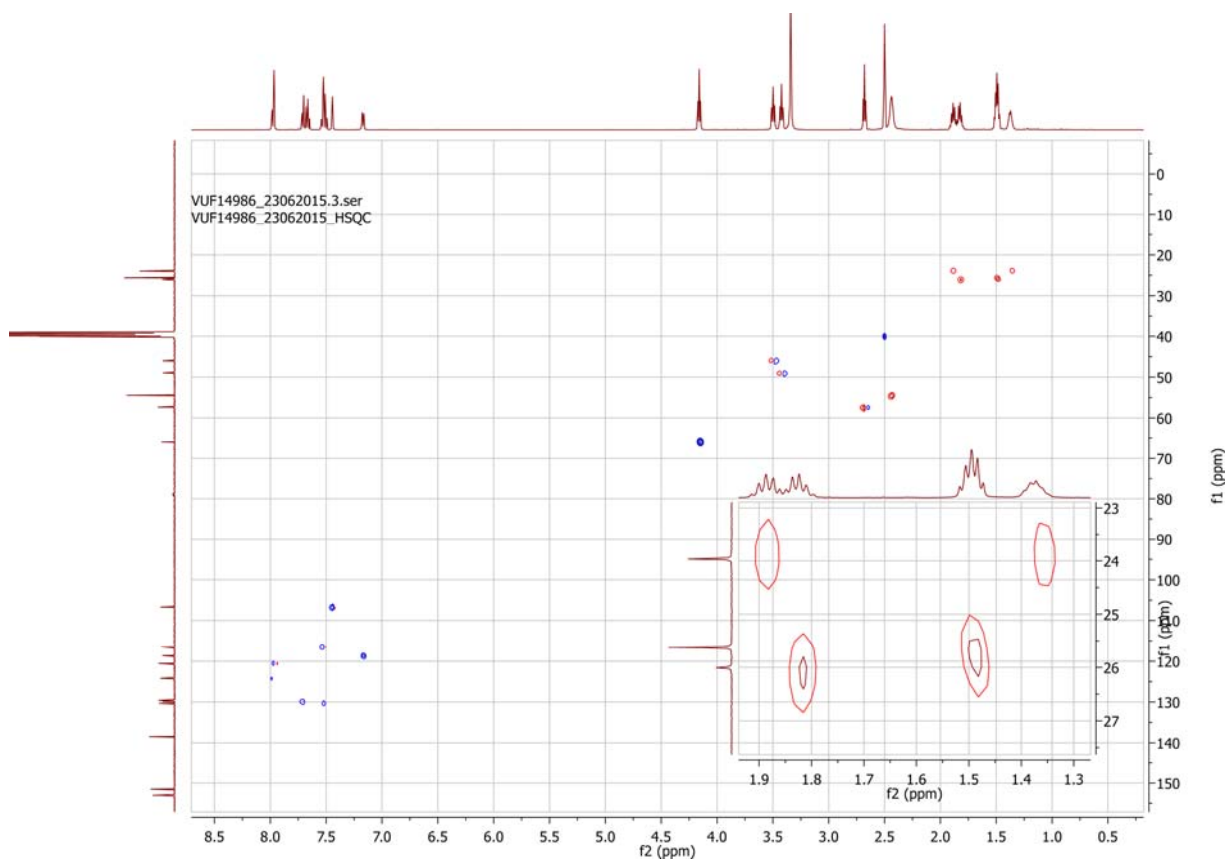

Figure S81: HSQC-NMR spectrum of (E)-3-((3-(2-(Piperidin-1-yl)ethoxy)phenyl)diazenyl)phenyl)(pyrrolidin-1-yl)methanone (27)

Acquired by : Admin  
 Date Acquired : 2/4/2016 1:59:59 PM  
 Sample Name : vuf14986\_04022016  
 Sample ID :  
 Tray# : 1  
 Vial# : 39  
 Injection Volume : 1  
 Data File : C:\LabSolutions\Data\2016\2016 - wk05\vuf14986\_04022016.lcd  
 Background File : AZOBLANCO\_04022016.lcd  
 Method File : Method SCAN ACID standard azo.lcm  
 Report Format : DefaultLCMS.lcr  
 Tuning File : C:\LabSolutions\Tuning File\Tuning-ESI-pos-neg01072015.lct  
 Processed by : Admin  
 Modified Date : 2/4/2016 2:51:53 PM

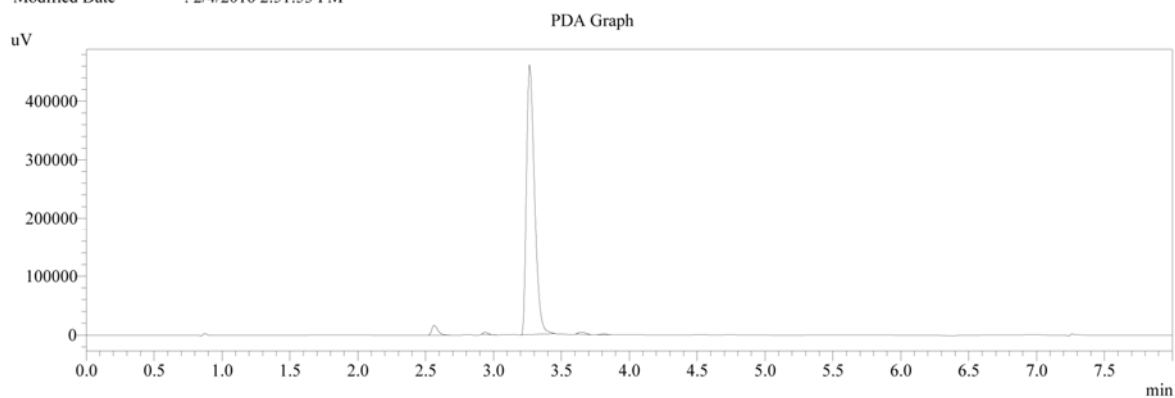

PDA Ch1 254nm 4nm

| Peak# | Name | Ret. Time | Area    | Area % |
|-------|------|-----------|---------|--------|
| 1     |      | 2.559     | 50352   | 2.514  |
| 2     |      | 2.932     | 7821    | 0.390  |
| 3     |      | 3.261     | 1926642 | 96.186 |
| 4     |      | 3.646     | 14072   | 0.703  |
| 5     |      | 3.806     | 4146    | 0.207  |

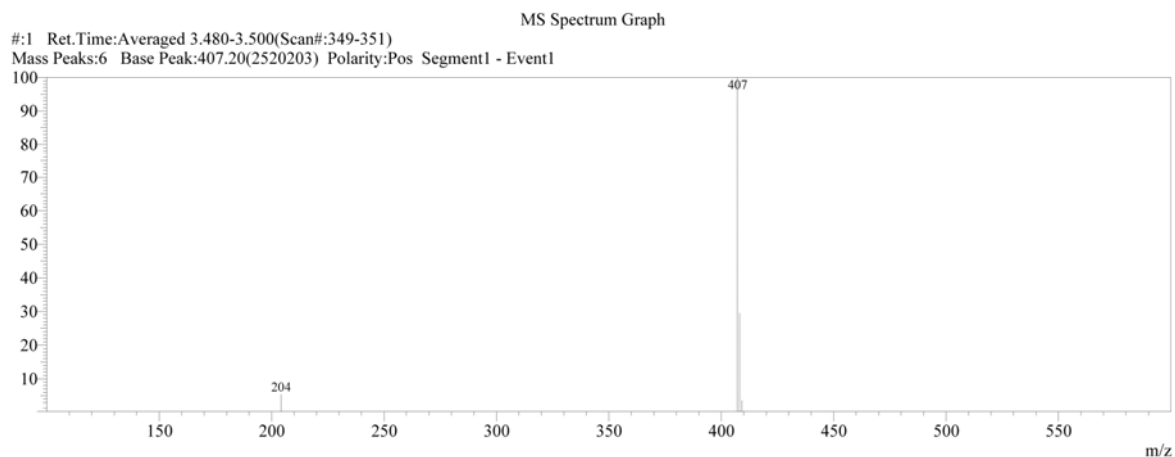

MS Spectrum Table

#1 Ret.Time:  
 BG Mode:Calc 3.300<->3.760(331<->377)  
 Mass Peaks:6 Base Peak:407.20(2520203) Polarity:Pos Segment1 - Event

| # | m/z    | Abs.Inten. | Rel.Inten. | Charge | Polarity | Monoisotopic | # | m/z    | Abs.Inten. | Rel.Inten. | Charge | Polarity | Monoisotopic |
|---|--------|------------|------------|--------|----------|--------------|---|--------|------------|------------|--------|----------|--------------|
| 1 | 204.10 | 135636     | 5.38       |        |          |              | 4 | 409.25 | 90508      | 3.59       |        |          |              |
| 2 | 407.20 | 2520203    | 100.00     |        |          |              | 5 | 835.45 | 85635      | 3.40       |        |          |              |
| 3 | 408.20 | 745204     | 29.57      |        |          |              | 6 | 836.35 | 27961      | 1.11       |        |          |              |

Figure S82: LC-MS chromatogram of (E)-3-((3-(2-(Piperidin-1-yl)ethoxy)phenyl)diazenyl)phenyl)(pyrrolidin-1-yl)methanone (27)



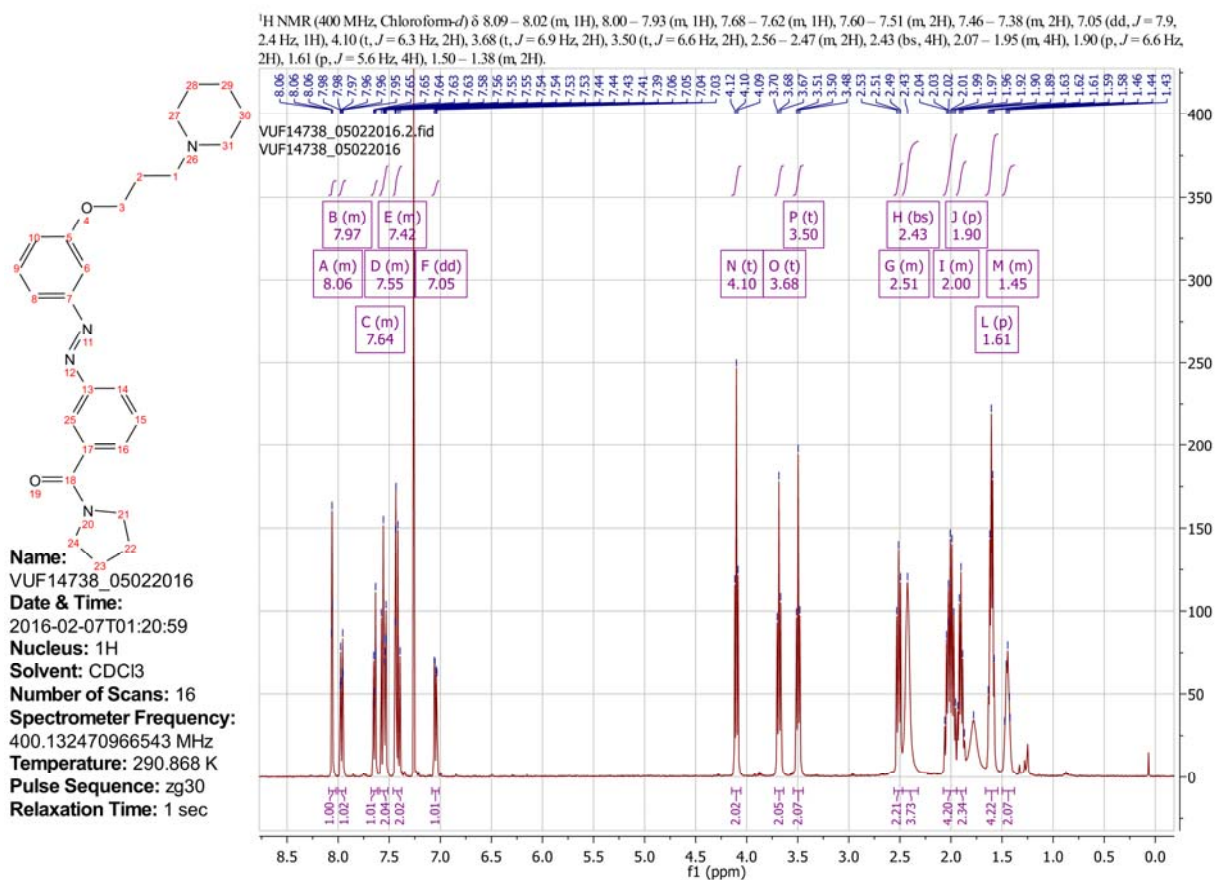

Figure S83: <sup>1</sup>H-NMR spectrum of (E)-3-((3-(3-(Piperidin-1-yl)propoxy)phenyl)diazenyl)phenyl)(pyrrolidin-1-yl)methanone (28)

<sup>13</sup>C NMR (101 MHz, CDCl<sub>3</sub>) δ 169.01, 159.90, 153.79, 152.33, 138.34, 129.91, 129.71, 129.36, 124.60, 121.31, 118.73, 117.43, 106.49, 66.89, 56.13, 54.81, 49.79, 46.44, 26.92, 26.59, 26.09, 24.64, 24.56.

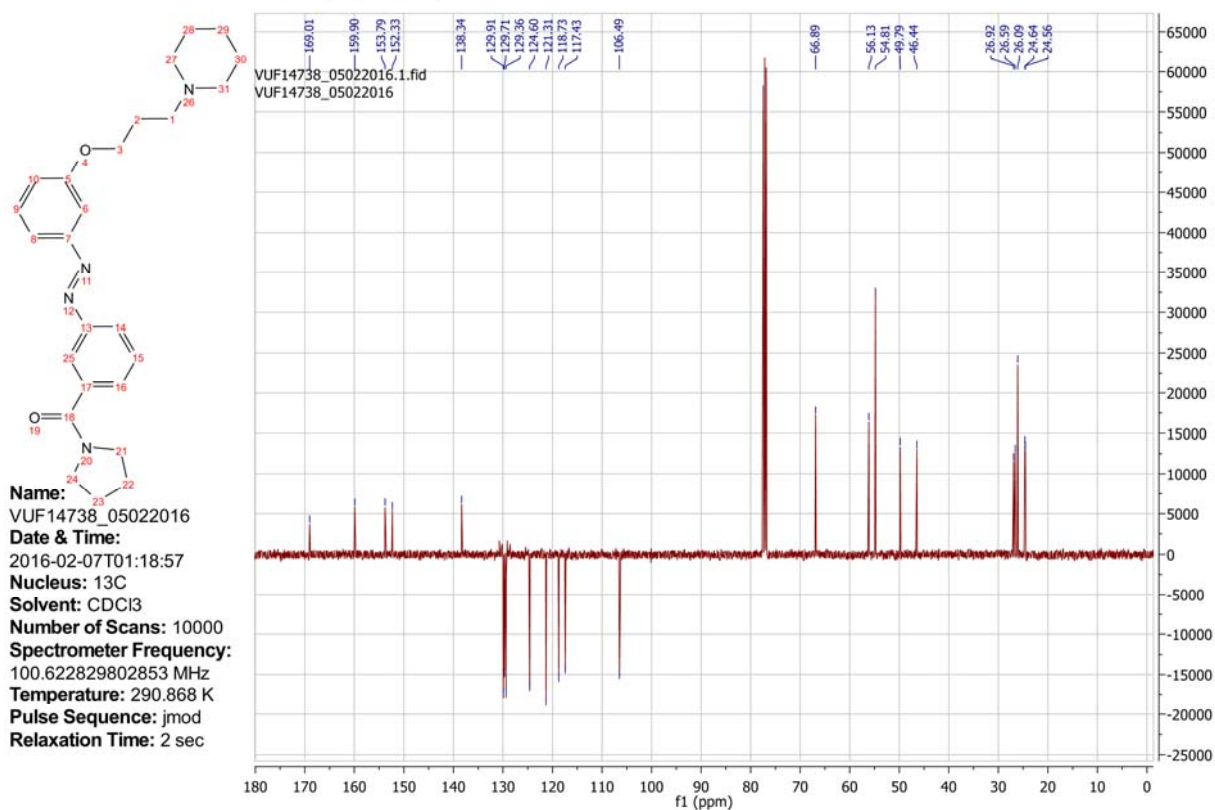

Figure S84: <sup>13</sup>C-NMR spectrum of (E)-3-((3-(3-(Piperidin-1-yl)propoxy)phenyl)diazenyl)phenyl)(pyrrolidin-1-yl)methanone (28)

Acquired by : Admin  
 Date Acquired : 10/17/2014 10:37:46 AM  
 Sample Name : VUF14738\_D\_17102014  
 Sample ID :  
 Tray# : 1  
 Vial# : 16  
 Injection Volume : 10  
 Data File : C:\LabSolutions\Data\2014\2014-wk42\VUF14738\_D\_17102014.lcd  
 Background File : DMSOd6\_blanco\_D\_17102014.lcd  
 Method File : Method SCAN ACID standard azo.lcm  
 Report Format : DefaultL.CMS.lcr  
 Tuning File : C:\LabSolutions\Data\Installatie NOV 2009\Tuning ESI POS + NEG JAN2010.lct  
 Processed by : Admin  
 Modified Date : 11/4/2014 12:06:14 PM

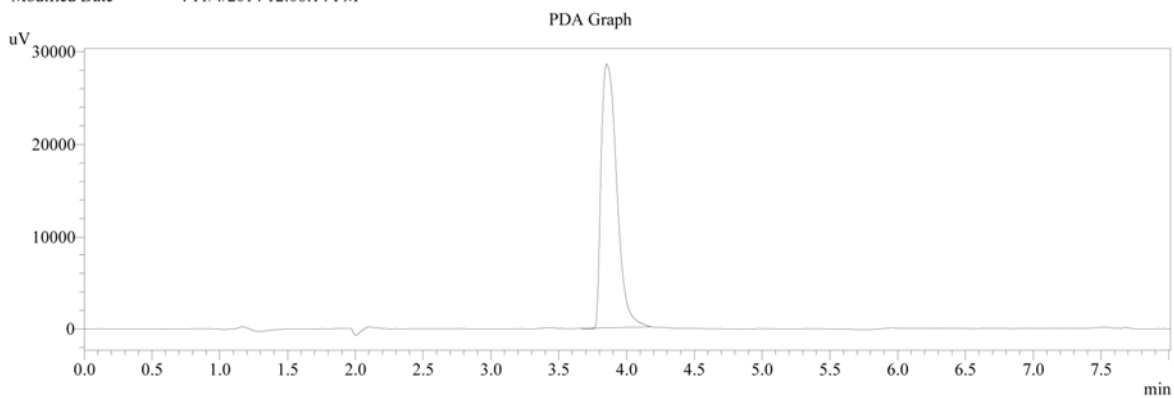

PDA Ch1 254nm 4nm

| Peak# | Name | Ret. Time | Area   | Area %  |
|-------|------|-----------|--------|---------|
| 1     |      | 3.849     | 230322 | 100.000 |

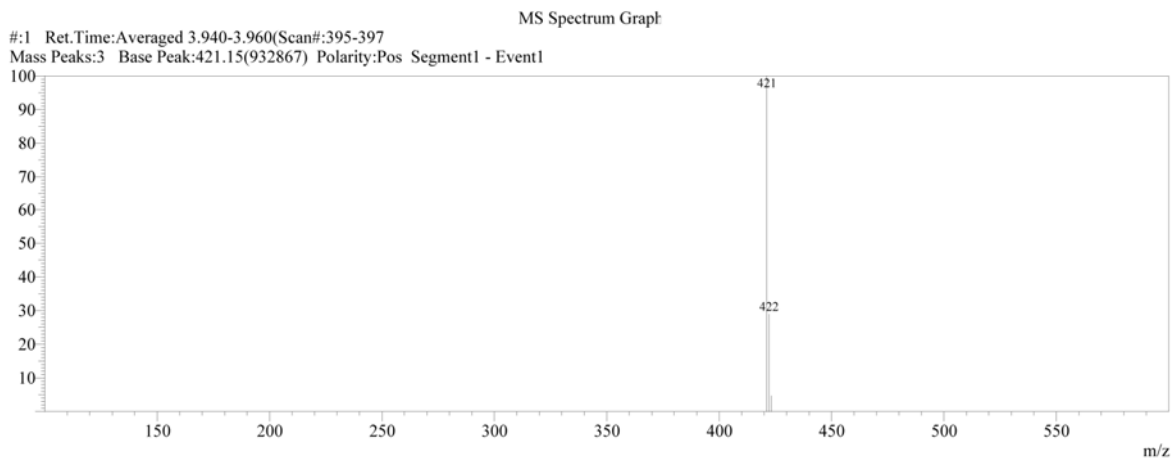

Figure S85: LC-MS chromatogram of (E)-3-((3-(3-(Piperidin-1-yl)propoxy)phenyl)diazenyl)phenyl)(pyrrolidin-1-yl)methanone (28)

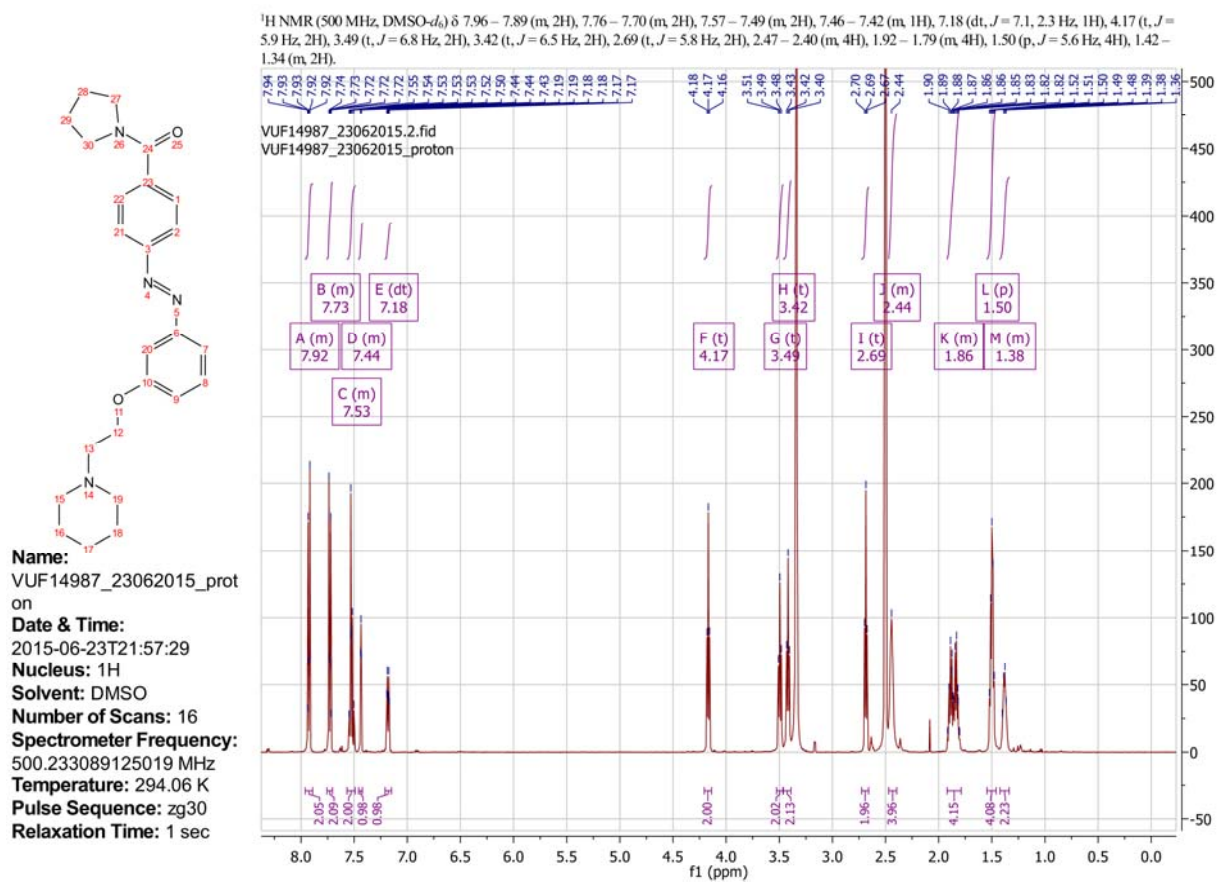

Figure S86: <sup>1</sup>H-NMR spectrum of (E)-4-((3-(2-(Piperidin-1-yl)ethoxy)phenyl)diazenyl)phenyl)(pyrrolidin-1-yl)methanone (29)

<sup>13</sup>C NMR (126 MHz, DMSO) δ 167.35, 159.39, 153.13, 152.12, 139.71, 130.37, 128.36, 122.43, 118.65, 116.62, 106.66, 65.98, 57.36, 54.45, 48.85, 46.03, 26.01, 25.63, 23.97, 23.95.

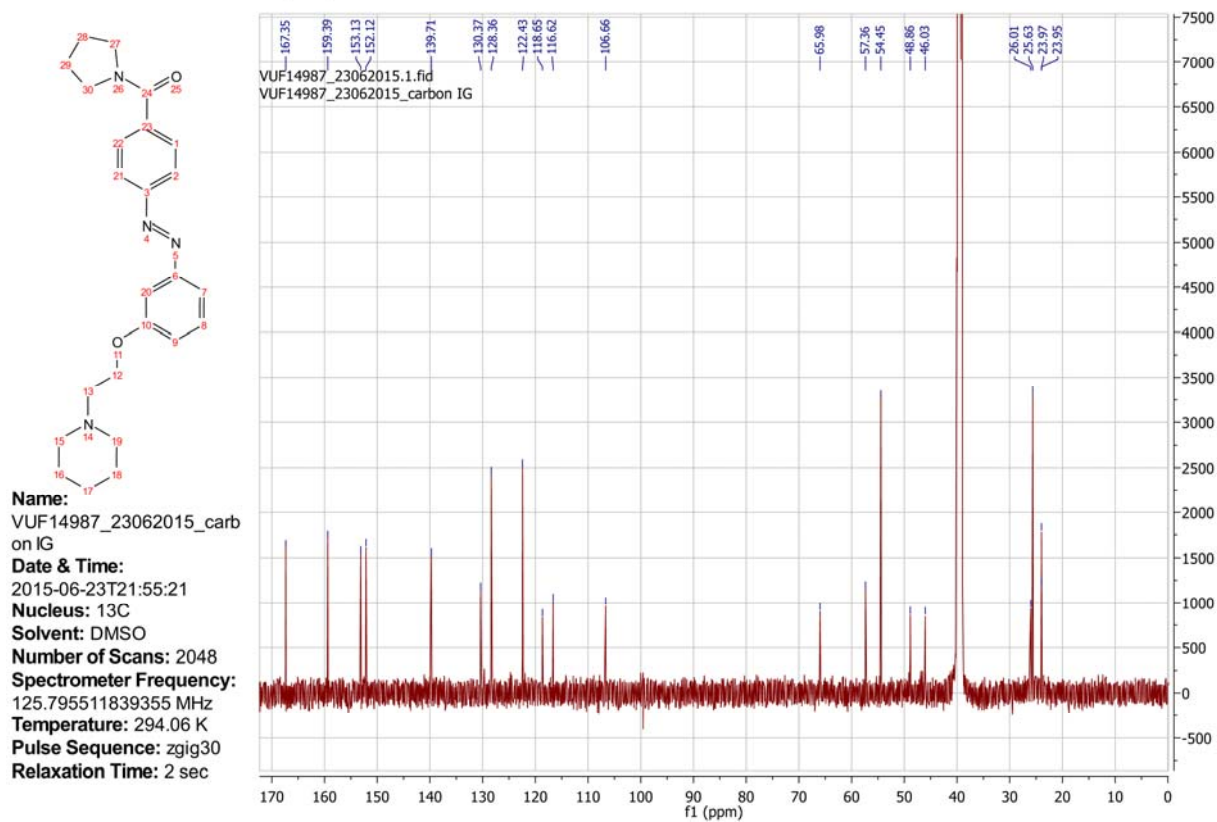

Figure S87: <sup>13</sup>C-NMR spectrum of (E)-4-((3-(2-(Piperidin-1-yl)ethoxy)phenyl)diazenyl)phenyl)(pyrrolidin-1-yl)methanone (29)

Acquired by : Admin  
 Date Acquired : 4/15/2016 12:08:45 PM  
 Sample Name : NIHA\_01\_049\_15042016  
 Sample ID :  
 Tray# : 1  
 Vial# : 18  
 Injection Volume : 5  
 Data File : C:\LabSolutions\Data\2016 - wk15\NIHA\_01\_049\_15042016.lcd  
 Background File : azoblanco\_13042016.lcd  
 Method File : Method SCAN ACID standard azo.lcm  
 Report Format : DefaultLCMS.lcr  
 Tuning File : C:\LabSolutions\Tuning\Tuning-ESI-pos-neg01072015a.lct  
 Processed by : Admin  
 Modified Date : 4/15/2016 12:39:28 PM

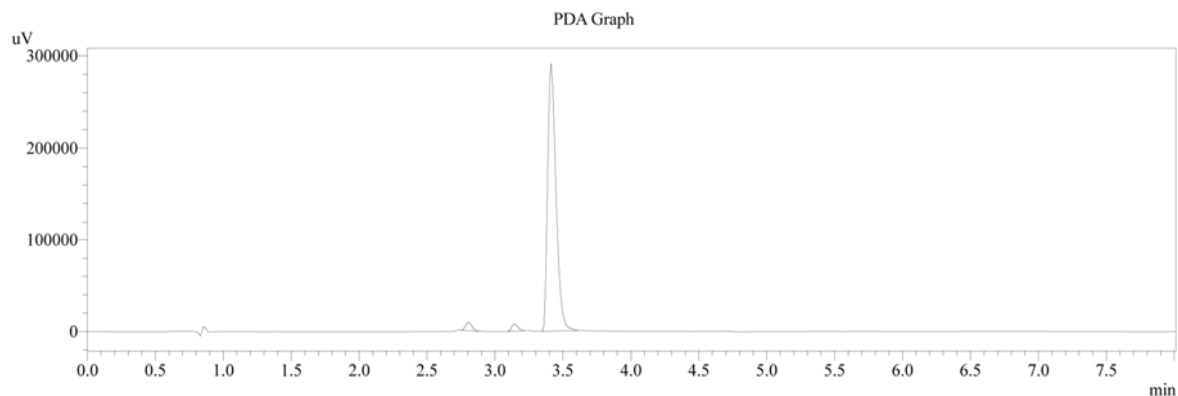

PDA Ch1 254nm 4nm

| Peak# | Name | Ret. Time | Area    | Area % |
|-------|------|-----------|---------|--------|
| 1     |      | 2.799     | 29629   | 2.263  |
| 2     |      | 3.139     | 26008   | 1.986  |
| 3     |      | 3.407     | 1253728 | 95.751 |

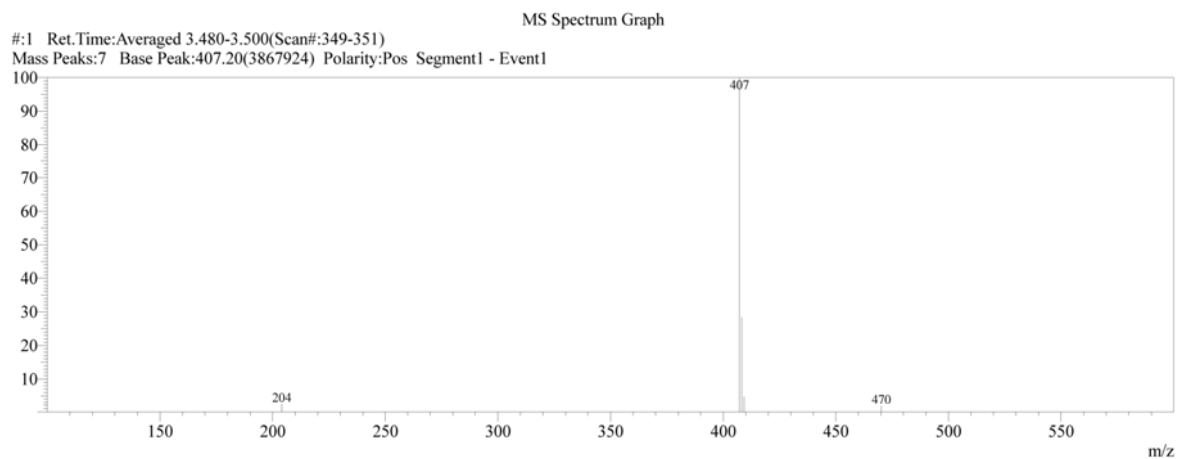

MS Spectrum Table

#:1 Ret.Time:  
 BG Mode:Calc 3.370<->3.830(338<->384)  
 Mass Peaks:7 Base Peak:407.20(3867924) Polarity:Pos Segment1 - Event1

| # | m/z    | Abs.Inten. | Rel.Inten. | Charge | Polarity | Monoisotopic | # | m/z    | Abs.Inten. | Rel.Inten. | Charge | Polarity | Monoisotopic |
|---|--------|------------|------------|--------|----------|--------------|---|--------|------------|------------|--------|----------|--------------|
| 1 | 204.05 | 88590      | 2.29       |        |          |              | 5 | 470.20 | 67753      | 1.75       |        |          |              |
| 2 | 407.20 | 3867924    | 100.00     |        |          |              | 6 | 835.55 | 79392      | 2.05       |        |          |              |
| 3 | 408.20 | 1097850    | 28.38      |        |          |              | 7 | 836.55 | 41247      | 1.07       |        |          |              |
| 4 | 409.25 | 182992     | 4.73       |        |          |              |   |        |            |            |        |          |              |

**Figure S88: LC-MS chromatogram of (E)-(4-((3-(2-(Piperidin-1-yl)ethoxy)phenyl)diazenyl)phenyl)(pyrrolidin-1-yl)methanone (29)**

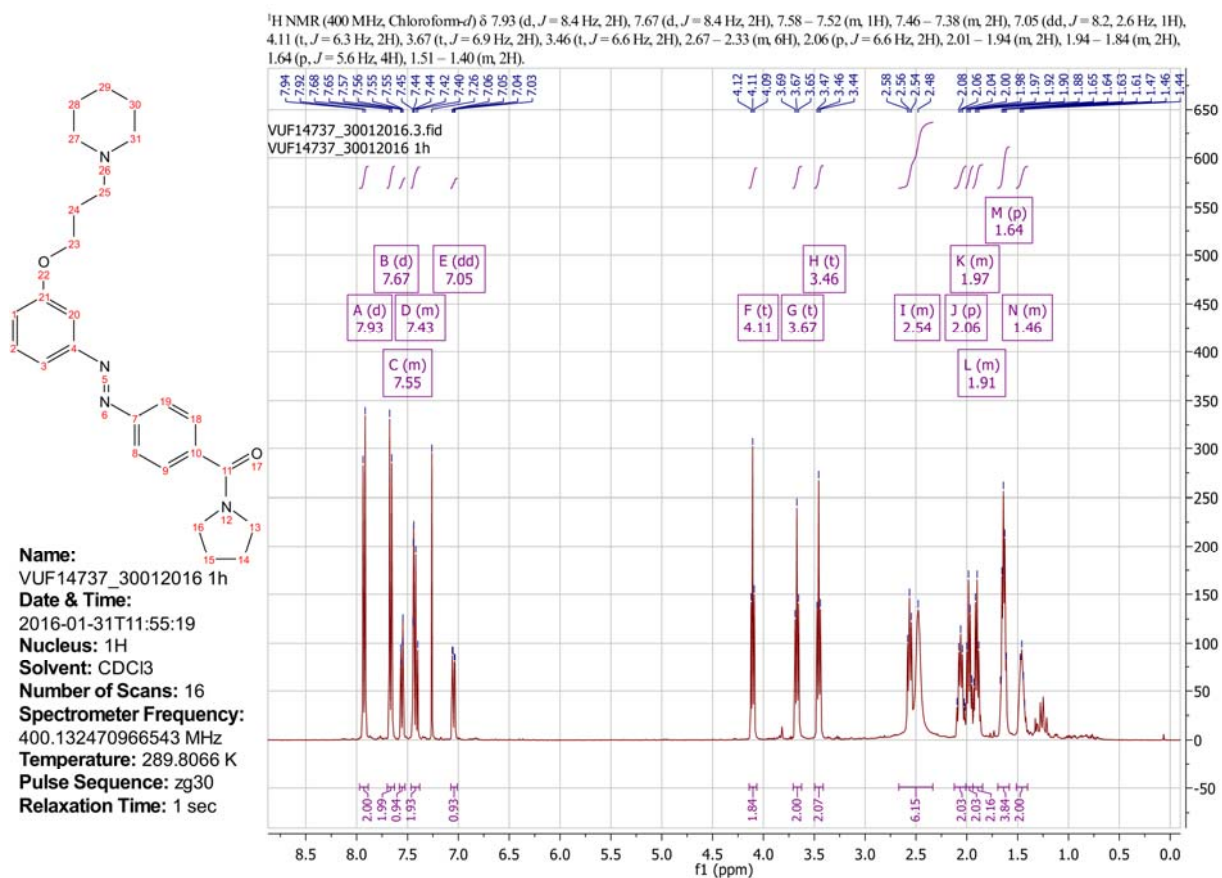

Figure S89: <sup>1</sup>H-NMR spectrum of (E)-4-((3-(3-(Piperidin-1-yl)propoxy)phenyl)diazanyl)phenyl)(pyrrolidin-1-yl)methanone (30)

<sup>13</sup>C NMR (101 MHz, CDCl<sub>3</sub>) δ 169.07, 159.84, 153.85, 153.16, 139.41, 129.93, 128.20, 122.87, 118.75, 117.57, 106.46, 66.76, 56.06, 54.69, 49.71, 46.42, 26.67, 26.57, 25.80, 24.59, 24.36.

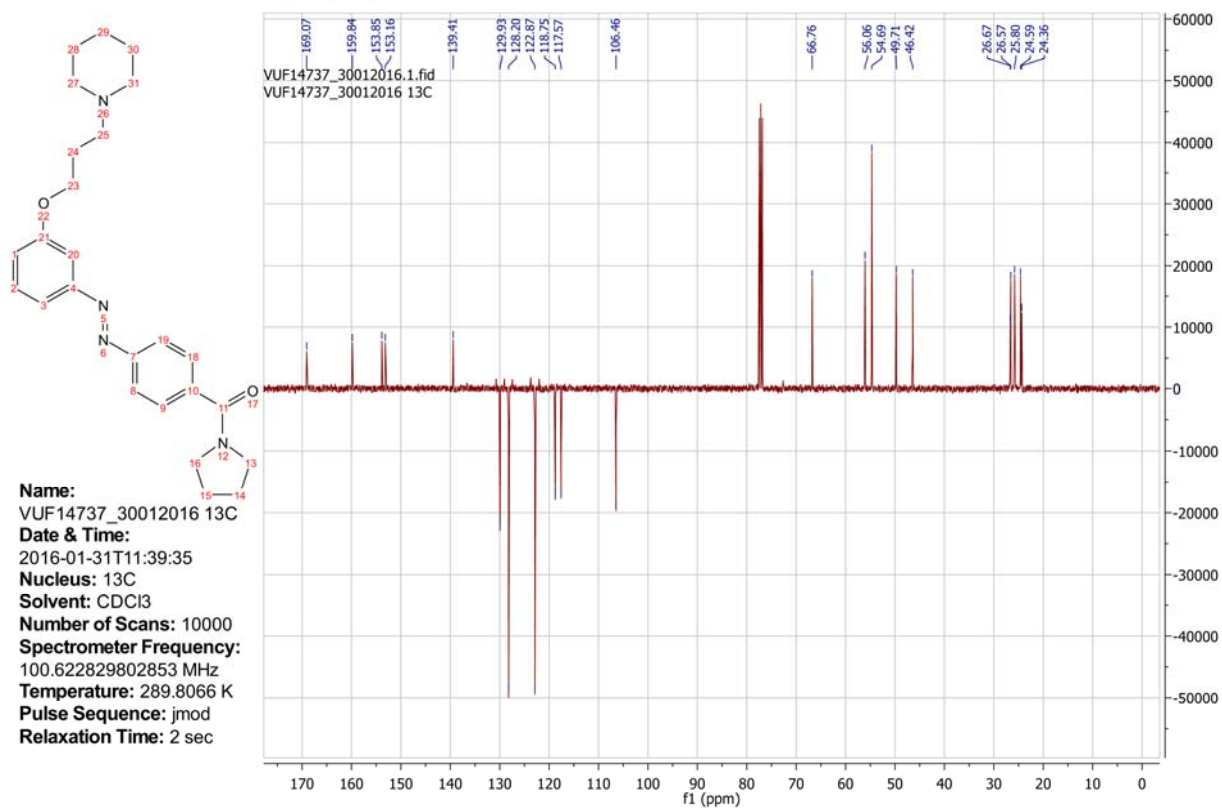

Figure S90: <sup>13</sup>C-NMR spectrum of (E)-4-((3-(3-(Piperidin-1-yl)propoxy)phenyl)diazanyl)phenyl)(pyrrolidin-1-yl)methanone (30)



Acquired by : Admin  
 Date Acquired : 5/13/2015 1:29:36 PM  
 Sample Name : VUF14737\_DARK\_13052015  
 Sample ID :  
 Tray# : 1  
 Vial# : 22  
 Injection Volume : 10  
 Data File : C:\LabSolutions\Data\2015\2015-WK20\VUF14737\_DARK\_13052015.lcd  
 Background File : VUFBlanco\_DARK\_13052015.lcd  
 Method File : Method SCAN ACID standard azo.lcm  
 Report Format : DefaultL.CMS.lcr  
 Tuning File : C:\LabSolutions\Data\Installatie NOV 2009\Tuning ESI POS + NEG JAN2010.ict  
 Processed by : Admin  
 Modified Date : 2/2/2016 10:28:43 AM

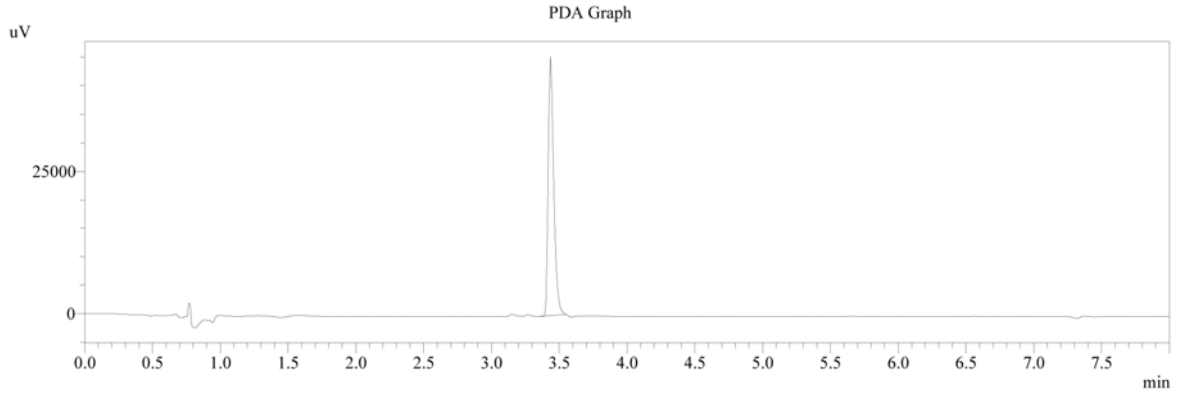

PDA Ch1 254nm 4nm

| Peak# | Name | Ret. Time | Area   | Area %  |
|-------|------|-----------|--------|---------|
| 1     |      | 3.431     | 129564 | 100.000 |

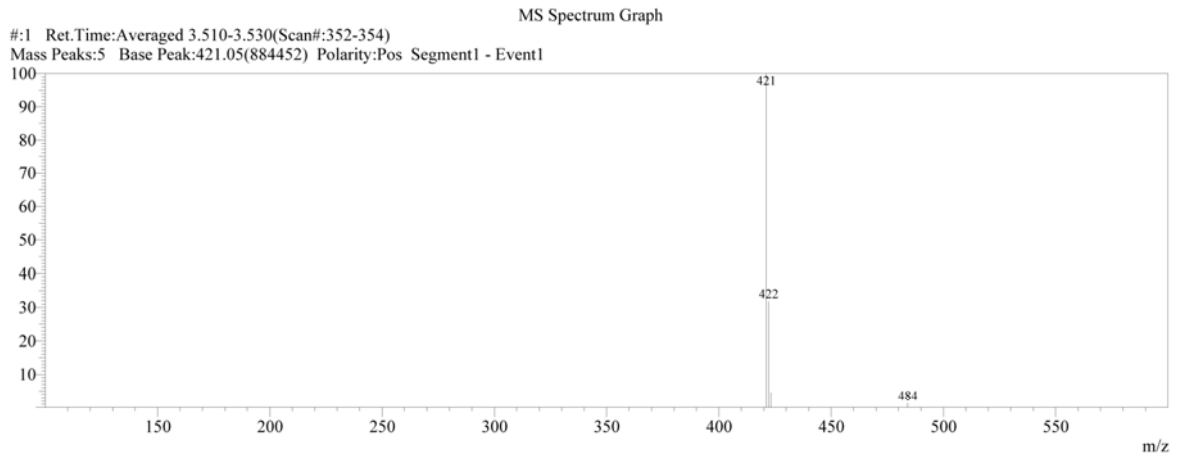

MS Spectrum Table

#:1 Ret.Time:  
 BG Mode:Calc 3.430<->3.720(344<->373)  
 Mass Peaks:5 Base Peak:421.05(884452) Polarity:Pos Segment1 - Event

| # | m/z    | Abs.Inten. | Rel.Inten. | Charge | Polarity | Monoisotopic | # | m/z    | Abs.Inten. | Rel.Inten. | Charge | Polarity | Monoisotopic |
|---|--------|------------|------------|--------|----------|--------------|---|--------|------------|------------|--------|----------|--------------|
| 1 | 421.05 | 884452     | 100.00     |        |          |              | 4 | 484.10 | 11839      | 1.34       |        |          |              |
| 2 | 422.10 | 281682     | 31.85      |        |          |              | 5 | 863.30 | 9037       | 1.02       |        |          |              |
| 3 | 423.10 | 40674      | 4.60       |        |          |              |   |        |            |            |        |          |              |

**Figure S91: LC-MS chromatogram of (E)-4-((3-(3-(Piperidin-1-yl)propoxy)phenyl)diazanyl)phenyl)(pyrrolidin-1-yl)methanone (30)**

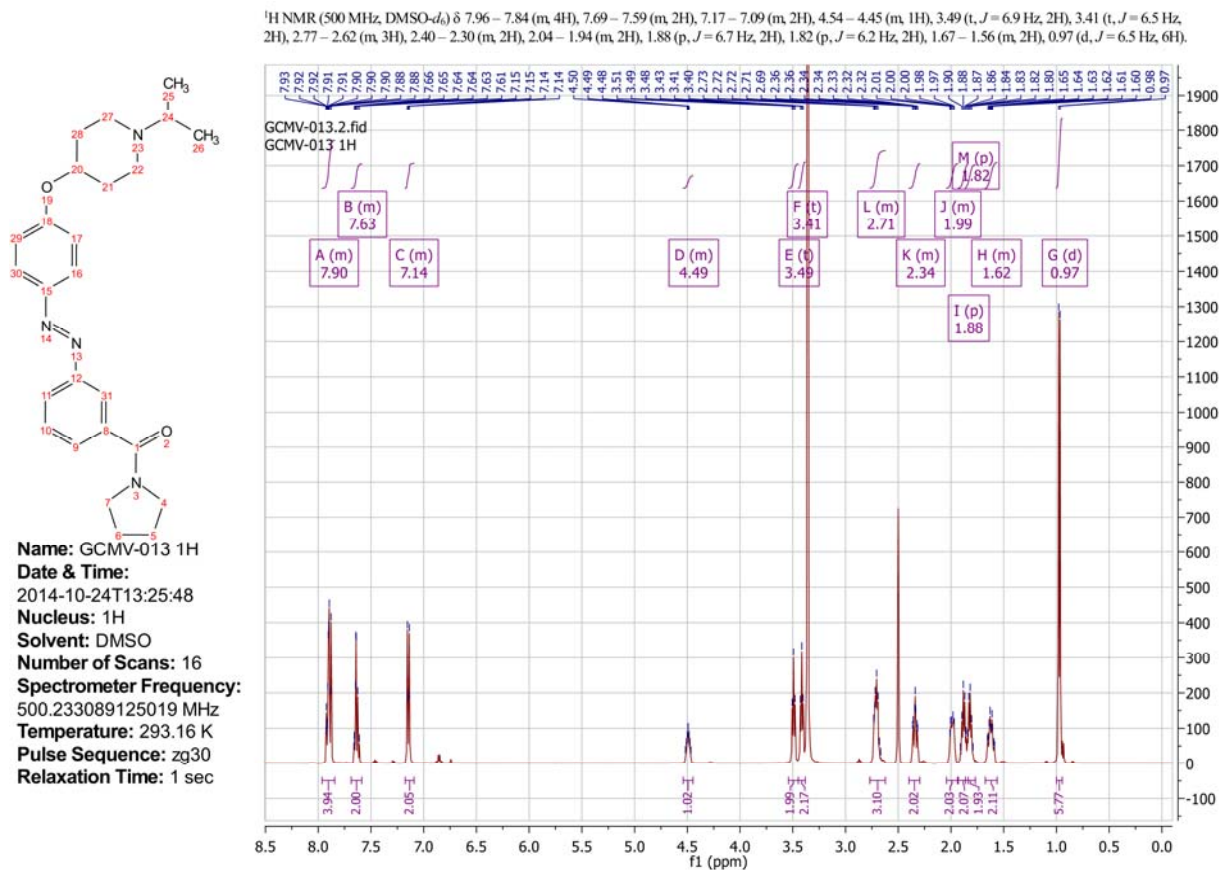

Figure S92: <sup>1</sup>H-NMR spectrum of (E)-3-((4-((1-Isopropylpiperidin-4-yl)oxy)phenyl)diazanyl)phenyl)(pyrrolidin-1-yl)methanone (31)

<sup>13</sup>C NMR (126 MHz, DMSO) δ 167.42, 160.41, 151.73, 145.84, 138.41, 129.47, 129.06, 124.85, 123.88, 120.17, 116.07, 73.49, 53.62, 48.97, 46.02, 45.33, 31.10, 26.01, 23.96, 18.13.

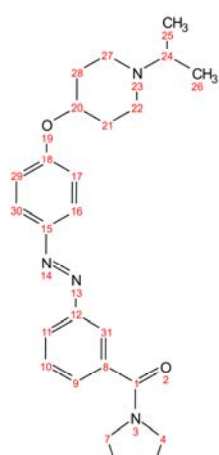

**Name:** GCMV-013 APT  
**Date & Time:** 2014-10-21T15:59:34  
**Nucleus:** 13C  
**Solvent:** DMSO  
**Number of Scans:** 400  
**Spectrometer Frequency:** 125.795511839355 MHz  
**Temperature:** 293.16 K  
**Pulse Sequence:** jmod  
**Relaxation Time:** 2 sec

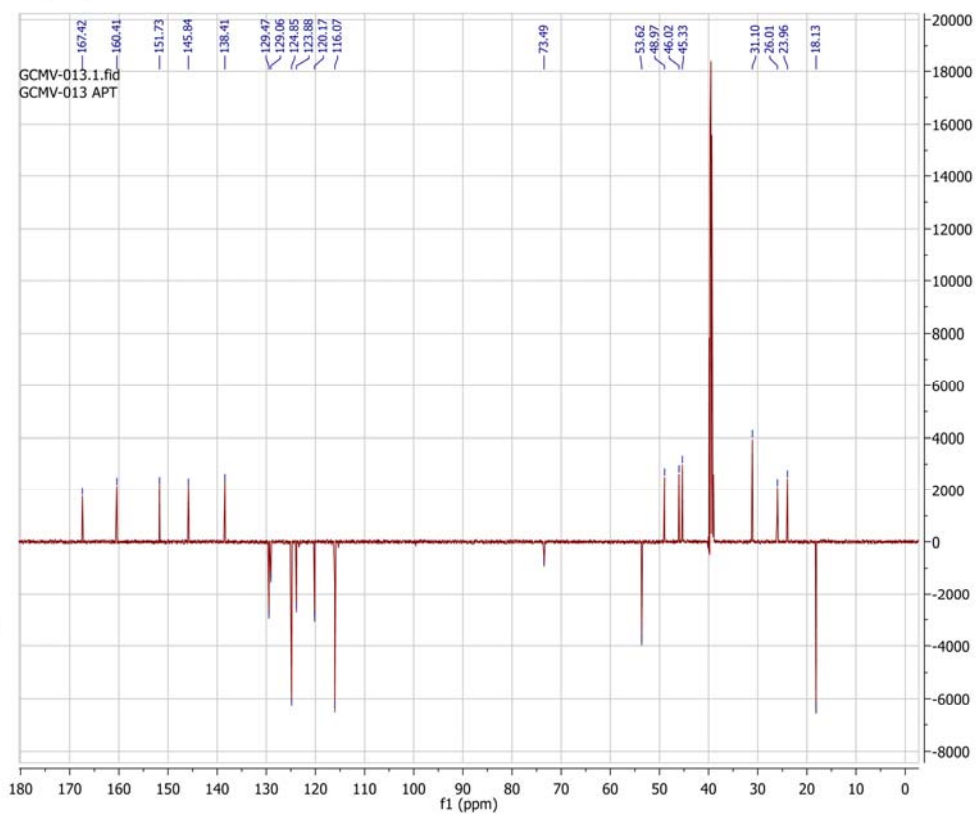

Figure S93: <sup>13</sup>C-NMR spectrum of (E)-3-((4-((1-isopropylpiperidin-4-yl)oxy)phenyl)diazenyl)phenyl(pyrrolidin-1-yl)methanone (31)

Acquired by : Admin  
 Date Acquired : 5/21/2015 11:19:54 AM  
 Sample Name : VUF14859\_DARK\_21052015  
 Sample ID :  
 Tray# : 1  
 Vial# : 67  
 Injection Volume : 10  
 Data File : C:\LabSolutions\Data\2015\2015-wk21\VUF14859\_DARK\_21052015.lcd  
 Background File : VUF\_blanco\_2\_IRRA\_21052015.lcd  
 Method File : Method SCAN ACID standard azo.lcm  
 Report Format : DefaultLCMS.lcr  
 Tuning File : C:\LabSolutions\Data\Installatie NOV 2009\Tuning ESI POS + NEG JAN2010.lct  
 Processed by : Admin  
 Modified Date : 2/8/2016 1:40:38 PM

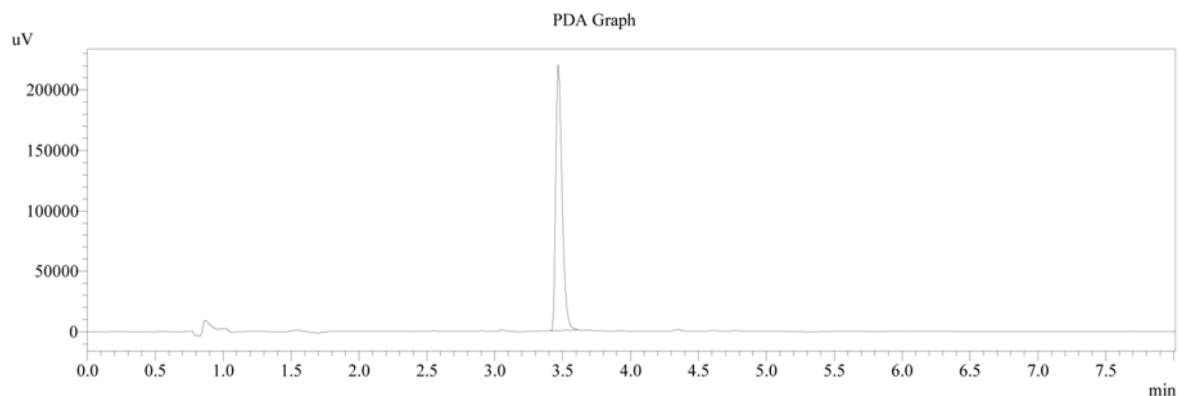

PDA Ch1 254nm 4nm

| Peak# | Name | Ret. Time | Area   | Area %  |
|-------|------|-----------|--------|---------|
| 1     |      | 3.463     | 708764 | 100.000 |

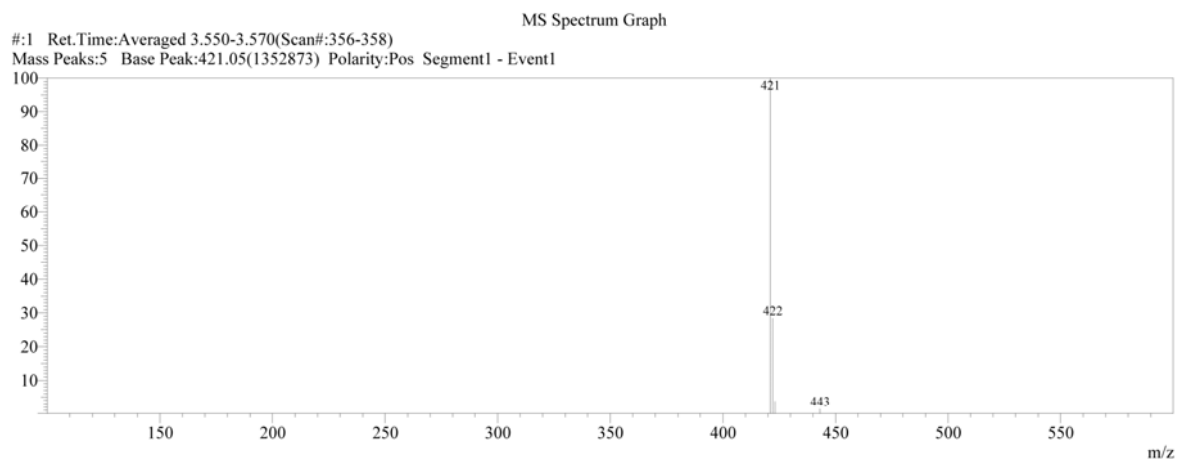

MS Spectrum Table

#1 Ret.Time:  
 BG Mode:Calc 3.450<->3.900(346<->391)  
 Mass Peaks:5 Base Peak:421.05(1352873) Polarity:Pos Segment1 - Event

| # | m/z    | Abs.Inten. | Rel.Inten. | Charge | Polarity | Monoisotopic | # | m/z    | Abs.Inten. | Rel.Inten. | Charge | Polarity | Monoisotopic |
|---|--------|------------|------------|--------|----------|--------------|---|--------|------------|------------|--------|----------|--------------|
| 1 | 421.05 | 1352873    | 100.00     |        |          |              | 4 | 443.05 | 19225      | 1.42       |        |          |              |
| 2 | 422.05 | 384790     | 28.44      |        |          |              | 5 | 863.35 | 16527      | 1.22       |        |          |              |
| 3 | 423.10 | 50882      | 3.76       |        |          |              |   |        |            |            |        |          |              |

**Figure S94: LC-MS chromatogram of (E)-3-((4-((1-isopropylpiperidin-4-yl)oxy)phenyl)diazanyl)phenyl)(pyrrolidin-1-yl)methanone (31)**

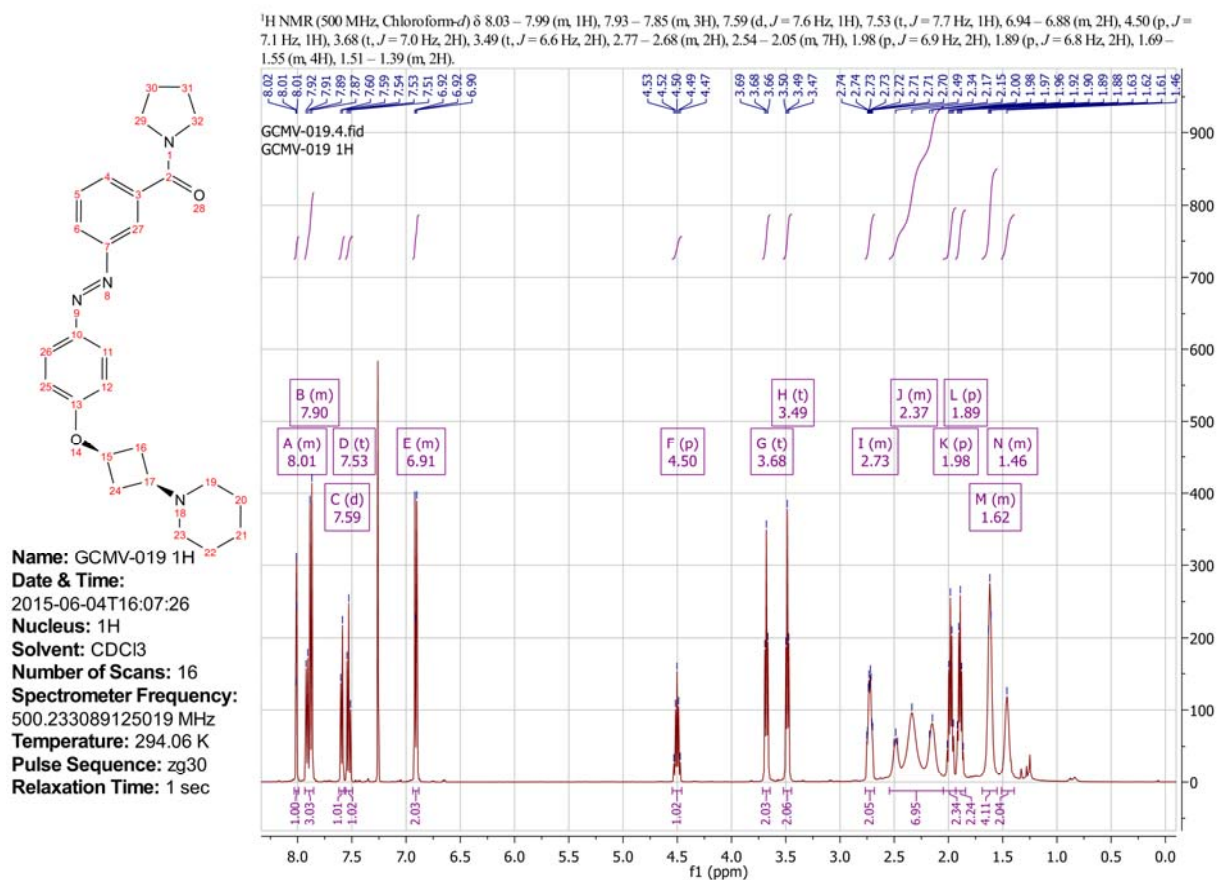

Figure S95: <sup>1</sup>H-NMR spectrum of (3-((E)-(4-((1s,3s)-3-(Piperidin-1-yl)cyclobutoxy)phenyl)diazanyl)phenyl)(pyrrolidin-1-yl)methanone (32)

$^{13}\text{C}$  NMR (126 MHz,  $\text{CDCl}_3$ )  $\delta$  169.17, 160.40, 152.53, 146.92, 138.24, 129.27, 129.00, 125.02, 124.33, 120.98, 115.41, 65.74, 52.63, 50.98, 49.78, 46.40, 35.60, 26.56, 25.42, 24.63, 24.25.

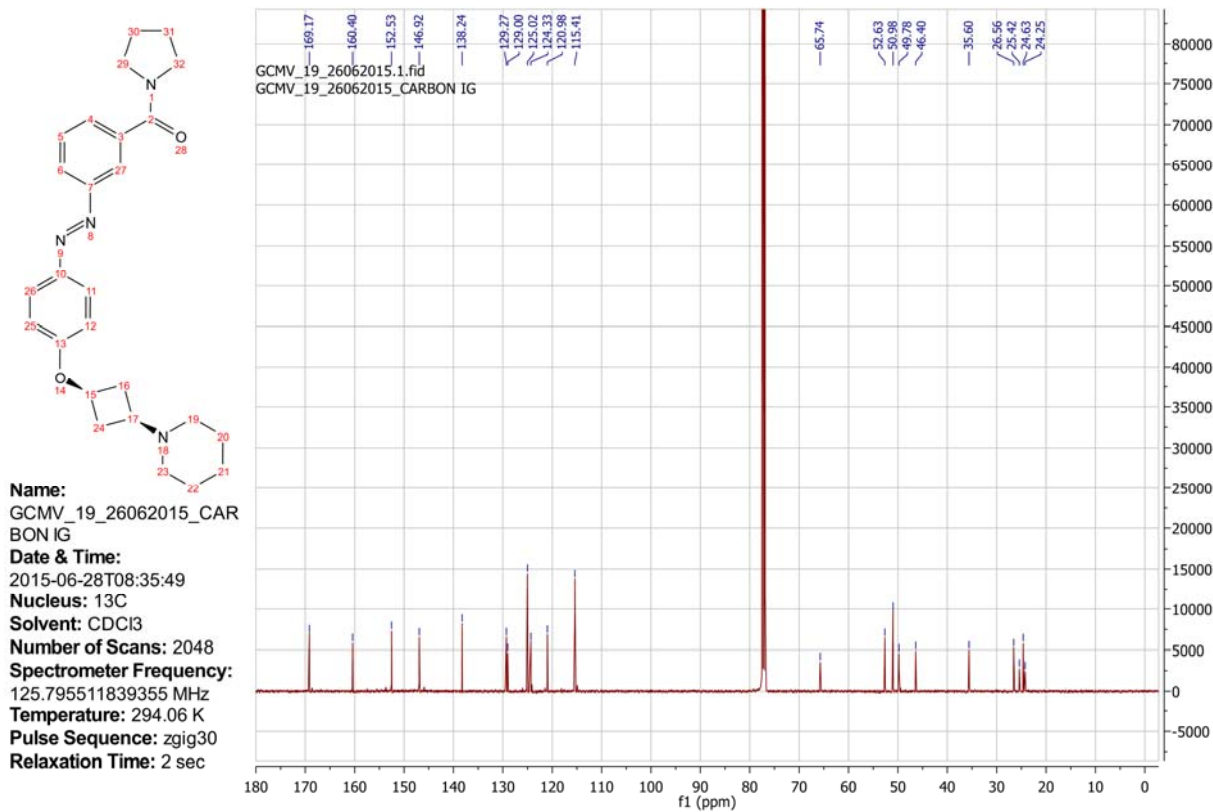

Figure S96:  $^{13}\text{C}$ -NMR spectrum of (3-((E)-(4-((1s,3s)-3-(Piperidin-1-yl)cyclobutoxy)phenyl)diazanyl)phenyl)(pyrrolidin-1-yl)methanone (32)

Acquired by : Admin  
 Date Acquired : 7/17/2015 1:26:21 PM  
 Sample Name : VUF15060\_DARK\_17072015  
 Sample ID :  
 Tray# : 1  
 Vial# : 15  
 Injection Volume : 10  
 Data File : C:\LabSolutions\Data\2015\2015-wk29\VUF15060\_DARK\_17072015.lcd  
 Background File : Blanco1\_IRRA1\_17072015.lcd  
 Method File : Method SCAN ACID standard azo.lcm  
 Report Format : DefaultLCMS.lcr  
 Tuning File : C:\LabSolutions\Tuning File\Tuning-ESI-pos-neg01072015.lct  
 Processed by : Admin  
 Modified Date : 2/4/2016 1:47:38 PM

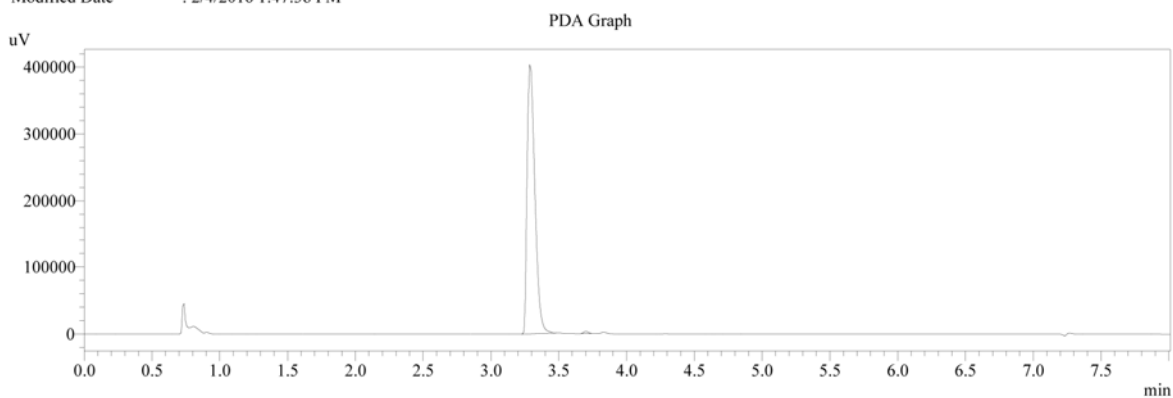

PDA Ch1 254nm 4nm

| Peak# | Name | Ret. Time | Area    | Area % |
|-------|------|-----------|---------|--------|
| 1     |      | 3.284     | 1599559 | 99.496 |
| 2     |      | 3.695     | 8108    | 0.504  |

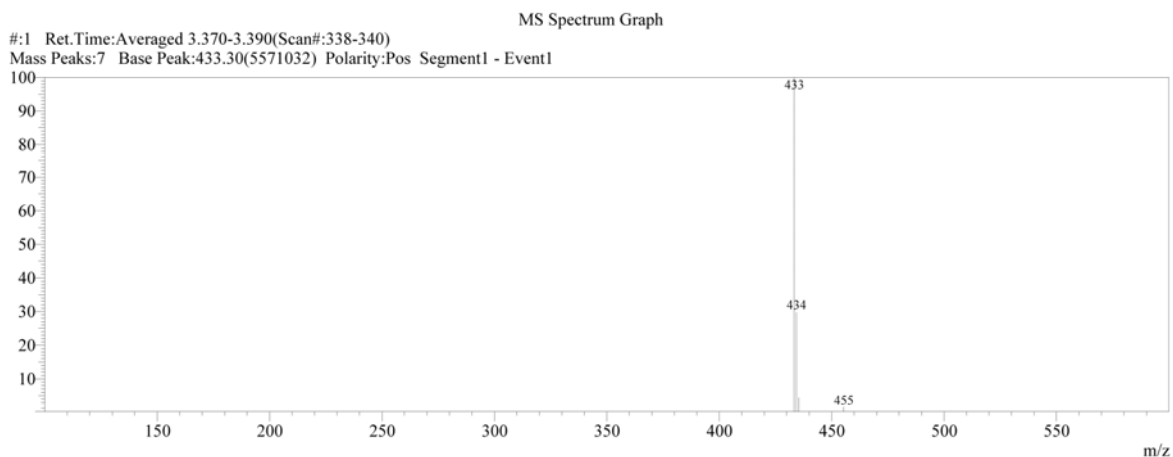

MS Spectrum Table

#1 Ret.Time:  
 BG Mode:Calc 3.240<->3.630(325<->364)  
 Mass Peaks:7 Base Peak:433.30(5571032) Polarity:Pos Segment1 - Event

| # | m/z    | Abs.Inten. | Rel.Inten. | Charge | Polarity | Monoisotopic | # | m/z    | Abs.Inten. | Rel.Inten. | Charge | Polarity | Monoisotopic |
|---|--------|------------|------------|--------|----------|--------------|---|--------|------------|------------|--------|----------|--------------|
| 1 | 433.30 | 5571032    | 100.00     |        |          |              | 5 | 865.60 | 97133      | 1.74       |        |          |              |
| 2 | 434.25 | 1659260    | 29.78      |        |          |              | 6 | 887.65 | 116803     | 2.10       |        |          |              |
| 3 | 435.30 | 248005     | 4.45       |        |          |              | 7 | 888.60 | 84582      | 1.52       |        |          |              |
| 4 | 455.30 | 80395      | 1.44       |        |          |              |   |        |            |            |        |          |              |

Figure S97: LC-MS chromatogram of (3-((E)-(4-((1s,3s)-3-(Piperidin-1-yl)cyclobutoxy)phenyl)diazanyl)phenyl)(pyrrolidin-1-yl)methanone (32)

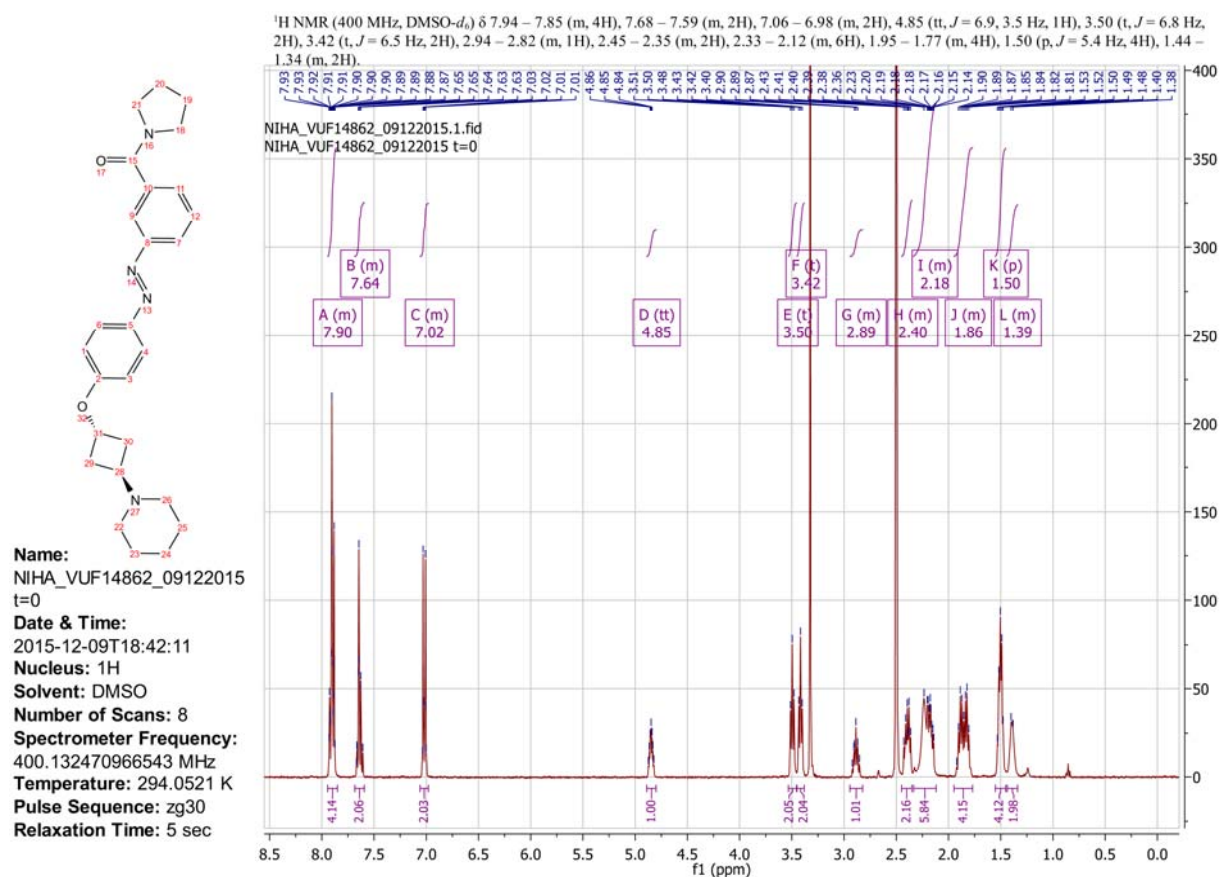

Figure S98: <sup>1</sup>H-NMR spectrum of (3-((E)-4-((1*r*,3*s*)-3-(Piperidin-1-yl)cyclobutoxy)phenyl)diazenyl)phenyl)(pyrrolidin-1-yl)methanone (33)



<sup>13</sup>C NMR (126 MHz, DMSO) δ 167.41, 160.31, 151.71, 146.03, 138.42, 129.47, 129.08, 124.85, 123.89, 120.19, 115.56, 69.98, 56.37, 50.49, 48.97, 46.01, 33.12, 26.00, 25.27, 24.10, 23.96.

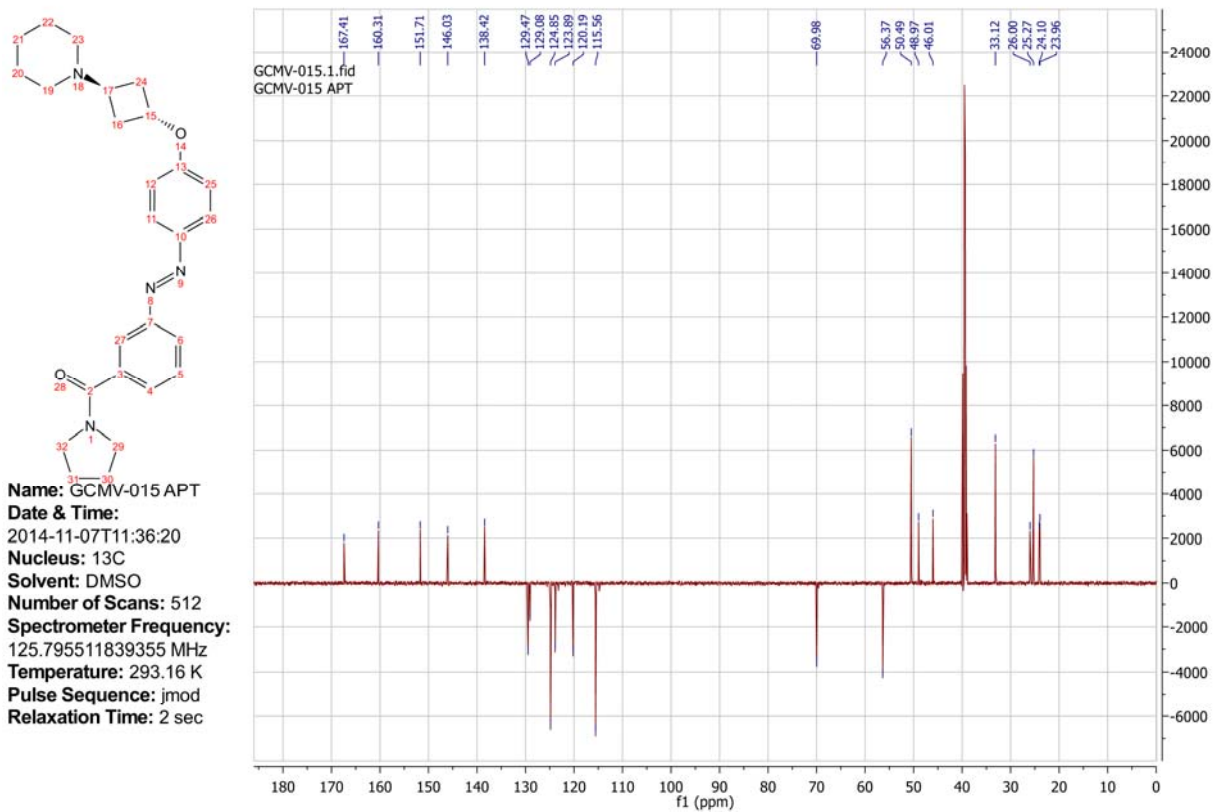

Figure S99: <sup>13</sup>C-NMR spectrum of (3-((E)-(4-((1*r*,3*s*)-3-(Piperidin-1-yl)cyclobutoxy)phenyl)diazenyl)phenyl)(pyrrolidin-1-yl)methanone (**33**)

Acquired by : Admin  
 Date Acquired : 1/22/2016 1:01:14 PM  
 Sample Name : VUF14862\_DARK\_22012016  
 Sample ID :  
 Tray# : 1  
 Vial# : 38  
 Injection Volume : 10  
 Data File : C:\LabSolutions\Data\2016\2016 - wk03\VUF14862\_DARK\_22012016.lcd  
 Background File : Blanco\_IRRA\_2\_22012016.lcd  
 Method File : Method\_SCAN\_ACID\_standard\_azo.lcm  
 Report Format : DefaultLCMS.lcr  
 Tuning File : C:\LabSolutions\Tuning File\Tuning-ESI-pos-neg01072015.lct  
 Processed by : Admin  
 Modified Date : 9/9/2016 4:13:49 PM

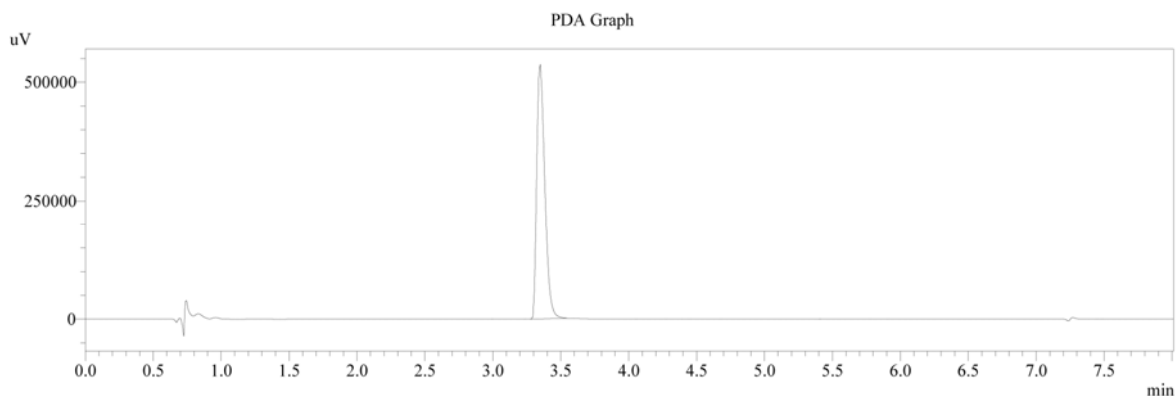

PDA Ch1 254nm 4nm

| Peak# | Name | Ret. Time | Area    | Area %  |
|-------|------|-----------|---------|---------|
| 1     |      | 3.343     | 2216208 | 100.000 |

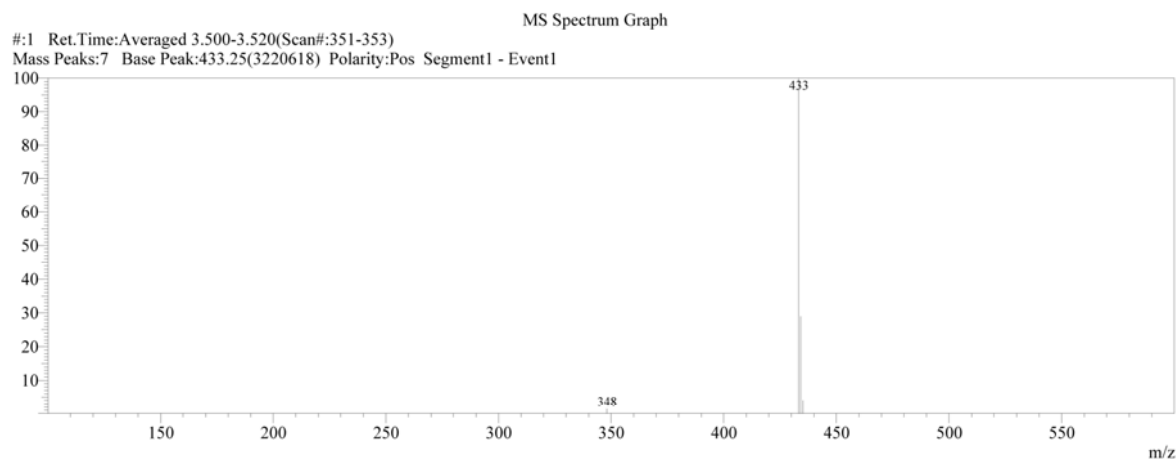

MS Spectrum Table

#1 Ret.Time:  
 BG Mode:Calc 3.370<->3.820(338<->383)

| # | m/z    | Abs.Inten. | Rel.Inten. | Charge | Polarity | Monoisotopic | # | m/z    | Abs.Inten. | Rel.Inten. | Charge | Polarity | Monoisotopic |
|---|--------|------------|------------|--------|----------|--------------|---|--------|------------|------------|--------|----------|--------------|
| 1 | 348.10 | 46254      | 1.44       |        |          |              | 5 | 865.50 | 40696      | 1.26       |        |          |              |
| 2 | 433.25 | 3220618    | 100.00     |        |          |              | 6 | 865.70 | 42171      | 1.31       |        |          |              |
| 3 | 434.20 | 934002     | 29.00      |        |          |              | 7 | 887.50 | 54099      | 1.68       |        |          |              |
| 4 | 435.20 | 131757     | 4.09       |        |          |              |   |        |            |            |        |          |              |

Figure S100: LC-MS chromatogram of (3-((E)-4-((1r,3s)-3-(Piperidin-1-yl)cyclobutoxy)phenyl)diazenyl)phenyl)(pyrrolidin-1-yl)methanone (33)

<sup>1</sup>H NMR (600 MHz, Chloroform-*d*) δ 7.76 (d, *J* = 8.1 Hz, 2H), 7.32 (d, *J* = 8.6 Hz, 2H), 4.58 (p, *J* = 7.5 Hz, 1H), 2.47 – 2.37 (m, 5H), 2.28 – 2.10 (m, 5H), 2.07 – 1.98 (m, 2H), 1.54 (p, *J* = 5.8 Hz, 4H), 1.45 – 1.35 (m, 2H).

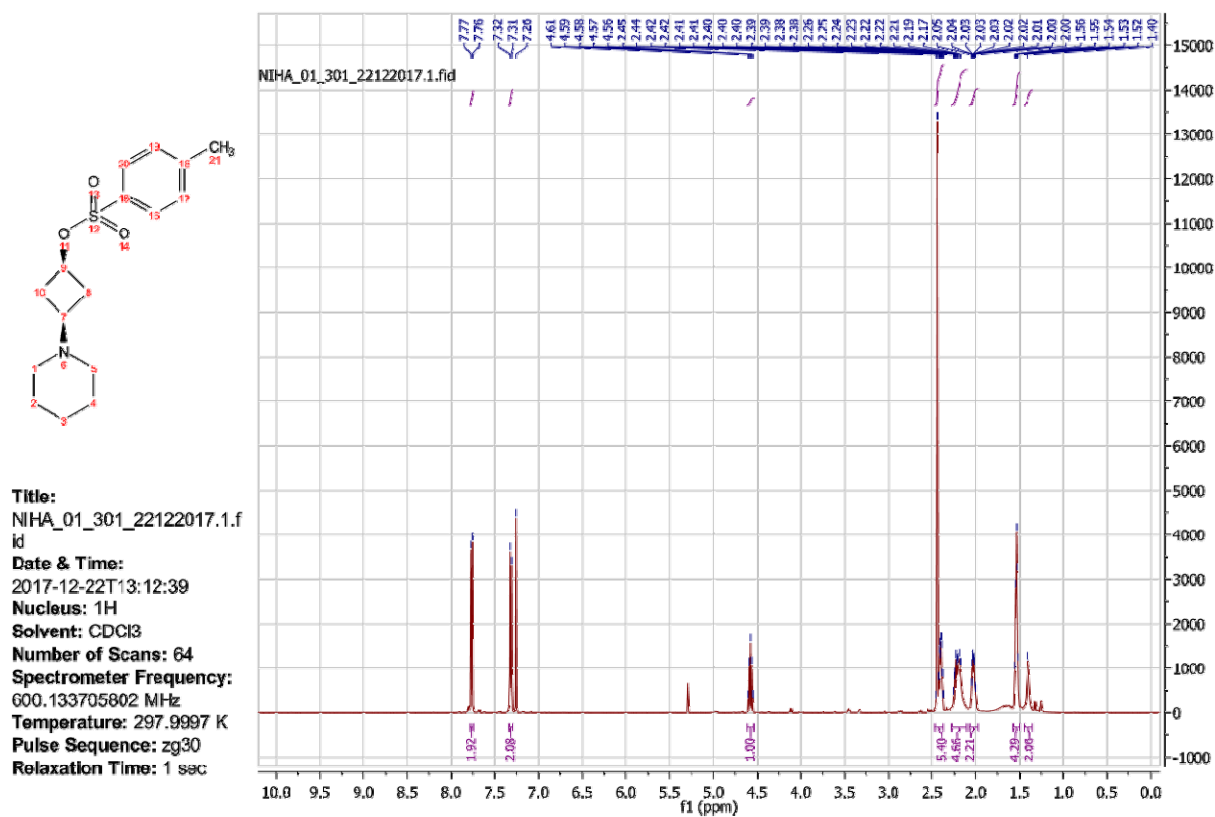

Figure S101: <sup>1</sup>H-NMR spectrum of (1s,3s)-3-(piperidin-1-yl)cyclobutyl 4-methylbenzenesulfonate (36)

<sup>13</sup>C NMR (126 MHz, Chloroform-d) δ 144.79, 134.23, 129.89, 127.95, 68.79, 52.39, 50.94, 35.97, 25.51, 24.23, 21.81.

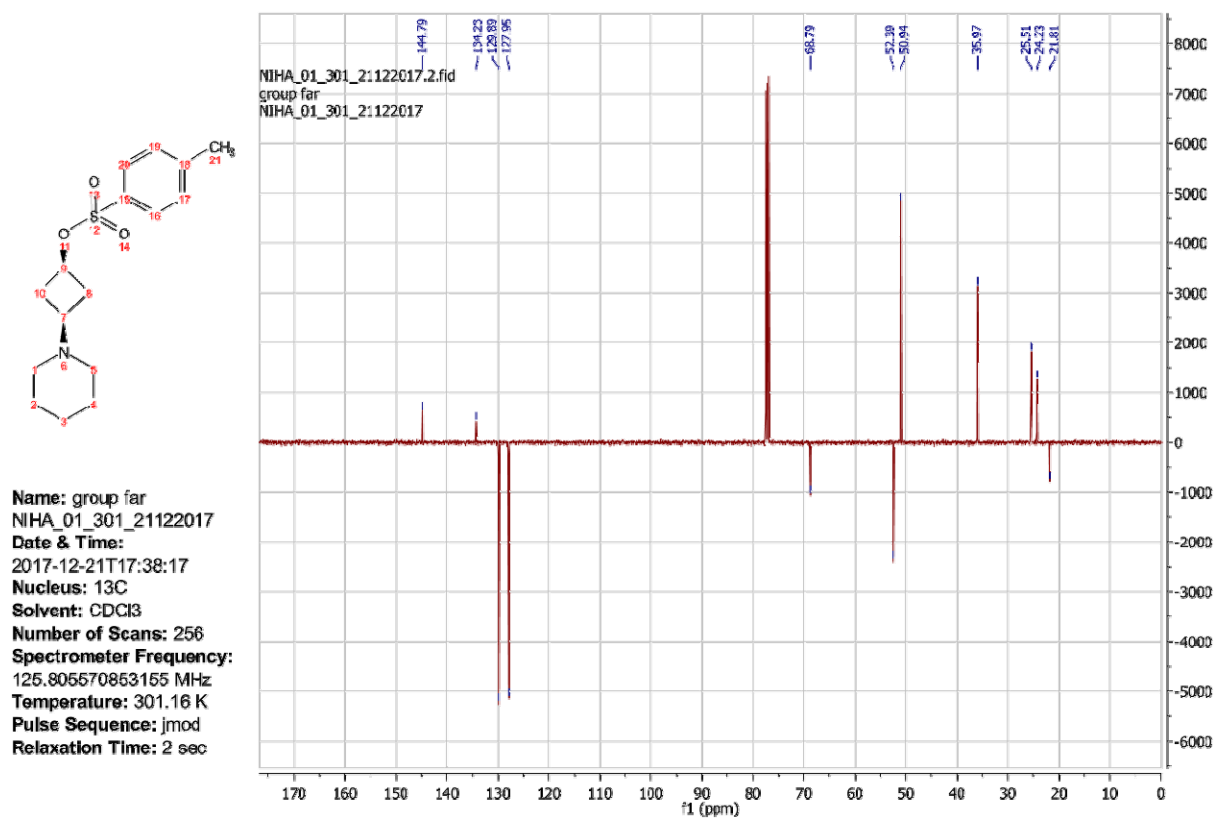

Figure S102: <sup>13</sup>C-NMR spectrum of (1s,3s)-3-(piperidin-1-yl)cyclobutyl 4-methylbenzenesulfonate (36)

Acquired by : Admin  
 Date Acquired : 16/1/2018 12:24:21 PM  
 Sample Name : NIHA\_01\_301\_16012018  
 Sample ID :  
 Tray# : 1  
 Vial# : 8  
 Injection Volume : 10  
 Data File : C:\LabSolutions\Data\2018\2018-wk03\NIHA\_01\_301\_16012018.lcd  
 Background File : blanco\_16012018.lcd  
 Method File : Method SCAN ACID standard.lcm  
 Report Format : DefaultLCMS.lcr  
 Tuning File : C:\LabSolutions\Tuning\Tuning-ESI-pos-neg01072015a.lct  
 Processed by : Admin  
 Modified Date : 16/1/2018 12:34:05 PM

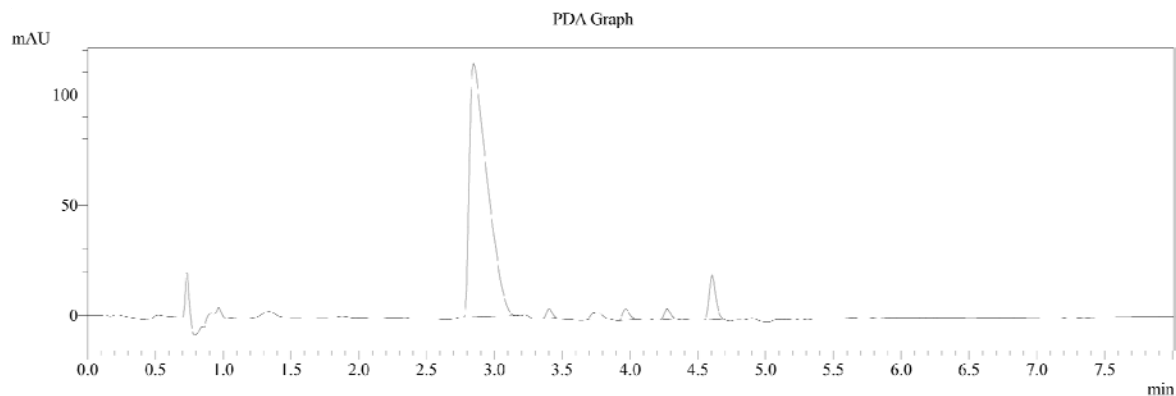

PDA Ch1 254nm 4nm

| Peak# | Name | Ret. Time | Area    | Area % |
|-------|------|-----------|---------|--------|
| 1     |      | 2.844     | 1048361 | 88.530 |
| 2     |      | 3.399     | 12979   | 1.096  |
| 3     |      | 3.728     | 20020   | 1.691  |
| 4     |      | 3.962     | 18117   | 1.530  |
| 5     |      | 4.267     | 15489   | 1.308  |
| 6     |      | 4.600     | 69218   | 5.845  |

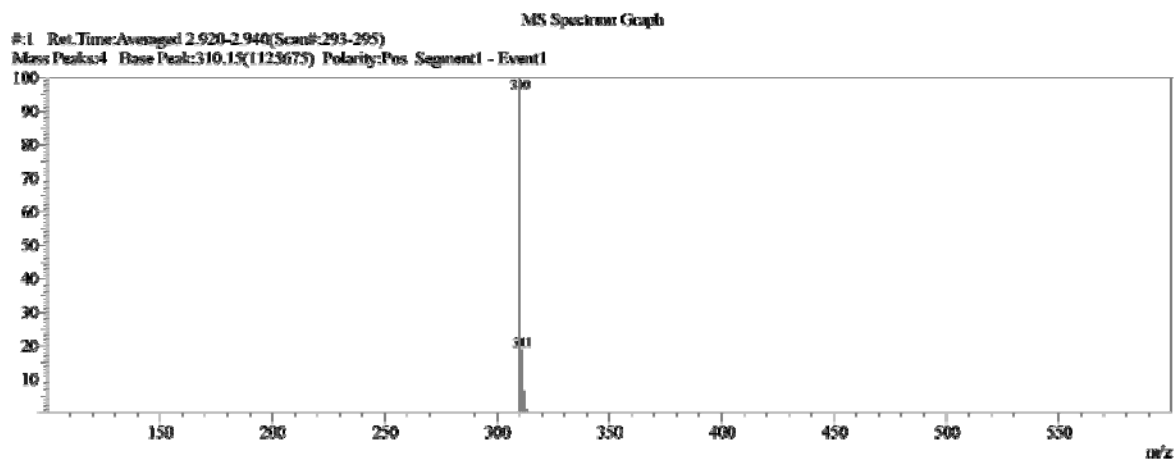

MS Spectrum Table

#1 Ret.Time:  
 BG Mode:Calc 2.780<->3.380(279<->339)  
 Mass Peaks:4 Base Peak:310.15(1125675) Polarity:Pos Segment1 - Event1

| # | m/z    | Abs.Inten. | Rel.Inten. | Charge | Polarity | Monoisotopic | # | m/z    | Abs.Inten. | Rel.Inten. | Charge | Polarity | Monoisotopic |
|---|--------|------------|------------|--------|----------|--------------|---|--------|------------|------------|--------|----------|--------------|
| 1 | 310.15 | 1125675    | 100.00     |        |          |              | 3 | 312.15 | 74205      | 6.59       |        |          |              |
| 2 | 311.15 | 212458     | 18.87      |        |          |              | 4 | 313.15 | 13154      | 1.17       |        |          |              |

Figure S103: LC-MS chromatogram of (1s,3s)-3-(piperidin-1-yl)cyclobutyl 4-methylbenzenesulfonate (36)

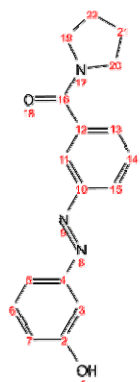

**Name:**  
 NIHA\_01\_300\_16012018  
**Date & Time:**  
 2018-01-16T08:52:15  
**Nucleus:** 1H  
**Solvent:** CDCl3  
**Number of Scans:** 128  
**Spectrometer Frequency:**  
 600.133705802 MHz  
**Temperature:** 298.0015 K  
**Pulse Sequence:** zg30  
**Relaxation Time:** 1 sec

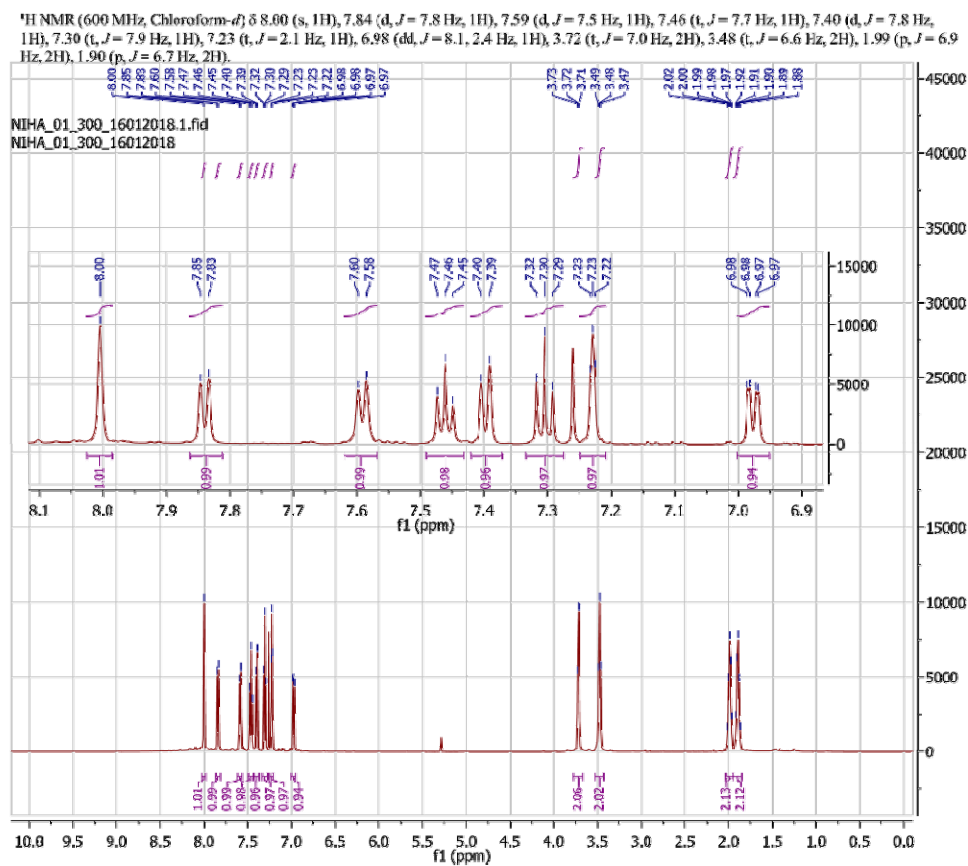

Figure S104: <sup>1</sup>H-NMR spectrum of (E)-3-((3-hydroxyphenyl)diazenyl)phenyl(pyrrolidin-1-yl)methanone (37)

<sup>13</sup>C NMR (151 MHz, Chloroform-d) δ 169.71, 157.51, 153.62, 152.34, 137.59, 129.90, 129.40, 129.34, 124.57, 121.28, 119.24, 116.95, 108.00, 49.95, 46.66, 26.47, 24.60.

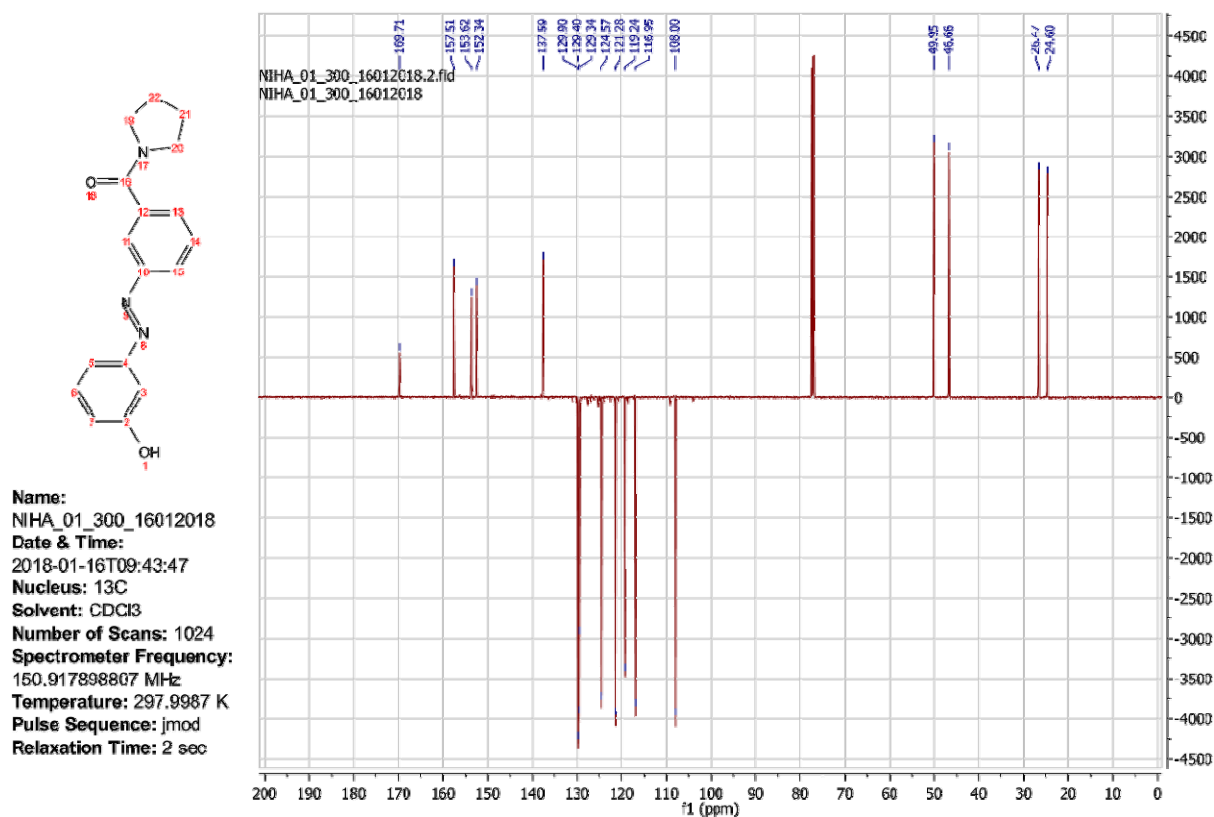

Figure S105: <sup>13</sup>C-NMR spectrum of (E)-3-((3-hydroxyphenyl)diazenyl)phenyl(pyrrolidin-1-yl)methanone (37)

Acquired by : Admin  
 Date Acquired : 21/12/2017 6:32:59 PM  
 Sample Name : NIHA\_01\_300\_f19\_21122017  
 Sample ID :  
 Tray# : 1  
 Vial# : 9  
 Injection Volume : 1  
 Data File : C:\LabSolutions\Data\2017\2017-wk51\NIHA\_01\_300\_f19\_21122017.lcd  
 Background File : azoblanco\_171222.lcd  
 Method File : Method SCAN BASF standard azo.lcm  
 Report Format : DefaultLCMS.lcr  
 Tuning File : C:\LabSolutions\Tuning\Tuning-ESI-pos-neg01072015a.lct  
 Processed by : Admin  
 Modified Date : 15/1/2018 4:16:50 PM

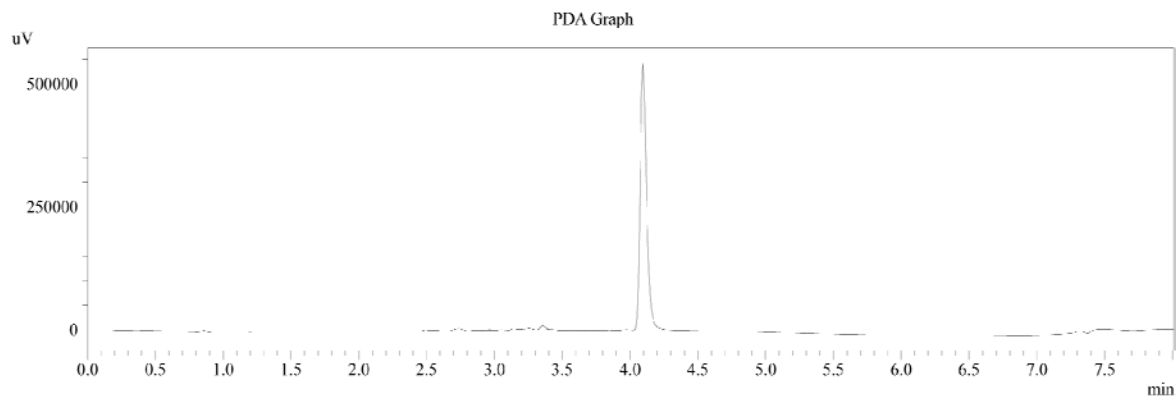

PDA Ch1 254nm 4nm

| Peak# | Name | Ret. Time | Area    | Area % |
|-------|------|-----------|---------|--------|
| 1     |      | 3.351     | 21936   | 1.223  |
| 2     |      | 4.090     | 1771388 | 98.777 |

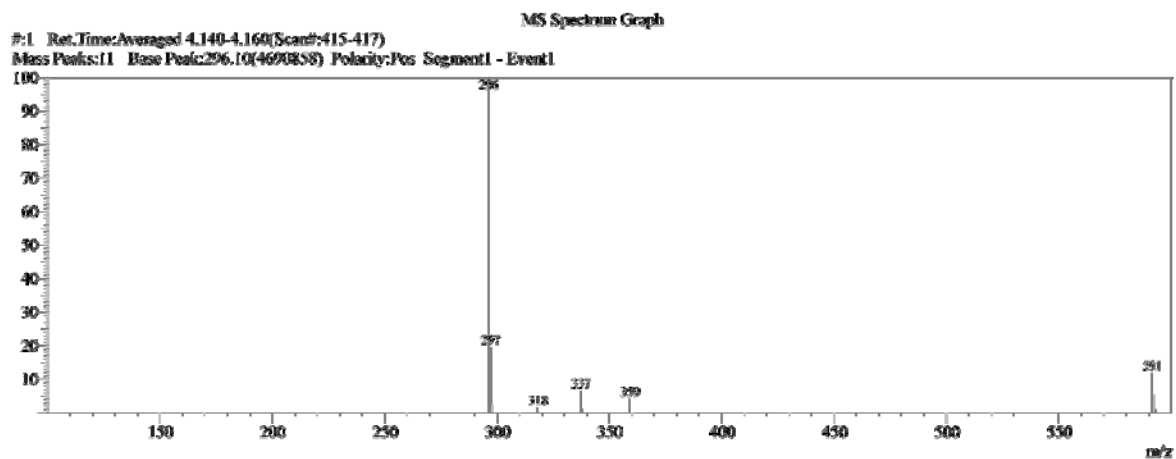

MS Spectrum Table

#1 Ret.Time:  
 BG Mode:Calc 3.910<>4.770(392<>478)  
 Mass Peaks:11 Base Peak:296.10(4690858) Polarity:Pos Segment1 - Event1

| # | m/z    | Abs.Inten. | Rel.Inten. | Charge | Polarity | Monoisotopic | #  | m/z    | Abs.Inten. | Rel.Inten. | Charge | Polarity | Monoisotopic |
|---|--------|------------|------------|--------|----------|--------------|----|--------|------------|------------|--------|----------|--------------|
| 1 | 296.10 | 4690858    | 100.00     |        |          |              | 7  | 359.05 | 189435     | 4.04       |        |          |              |
| 2 | 297.10 | 917244     | 19.55      |        |          |              | 8  | 591.30 | 557934     | 11.89      |        |          |              |
| 3 | 298.10 | 106124     | 2.26       |        |          |              | 9  | 592.30 | 248808     | 5.30       |        |          |              |
| 4 | 318.10 | 73579      | 1.57       |        |          |              | 10 | 593.25 | 51650      | 1.10       |        |          |              |
| 5 | 337.15 | 306453     | 6.53       |        |          |              | 11 | 613.30 | 108298     | 2.31       |        |          |              |
| 6 | 338.20 | 60743      | 1.29       |        |          |              |    |        |            |            |        |          |              |

Figure S106: LC-MS chromatogram of (E)-3-((3-hydroxyphenyl)diazenyl)phenyl(pyrrrolidin-1-yl)methanone (37)



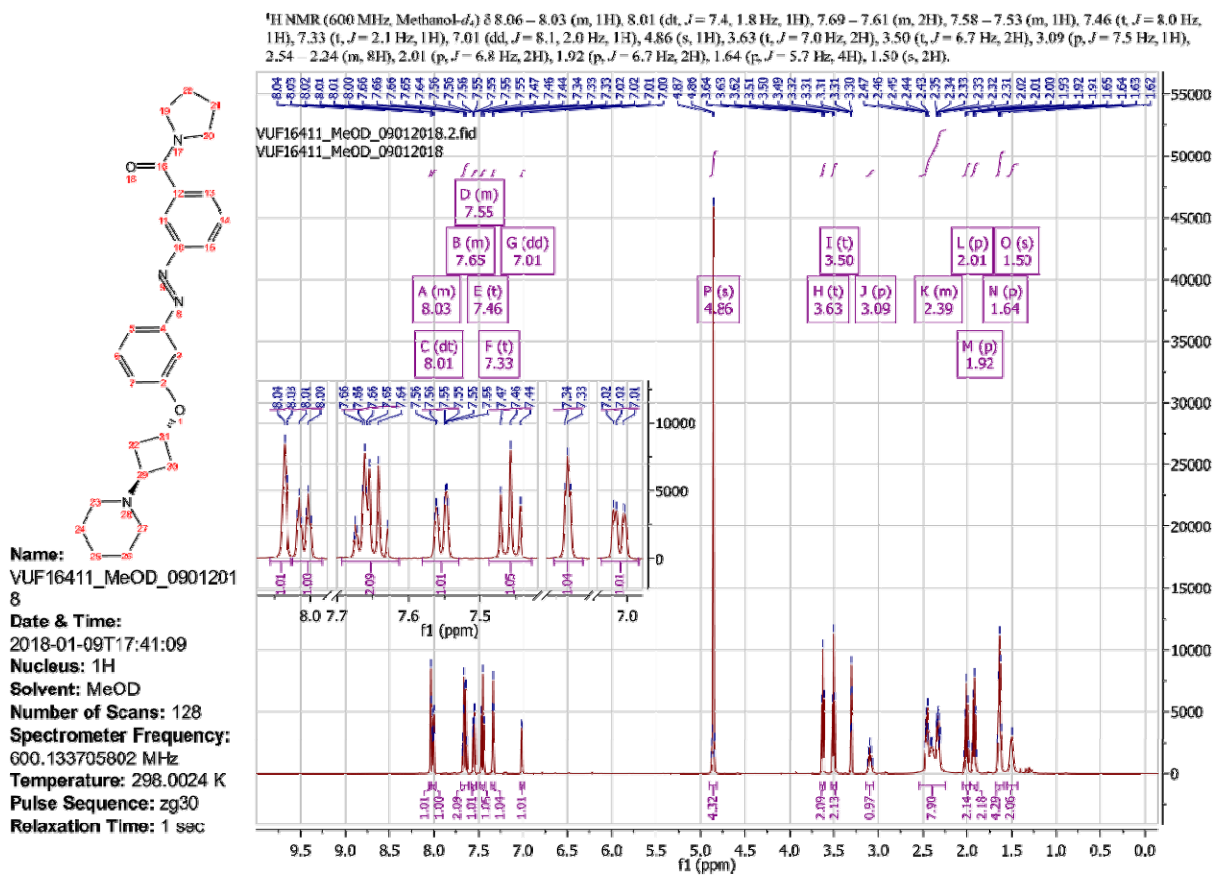

Figure S107: <sup>1</sup>H-NMR spectrum of (3-((E)-(3-((1*r*,3*s*)-3-(piperidin-1-yl)cyclobutoxy)phenyl)diazenyl)phenyl)(pyrrolidin-1-yl)methanone (34)

<sup>13</sup>C NMR (151 MHz, Methanol-d<sub>4</sub>) δ 170.83, 159.73, 155.02, 153.66, 139.25, 131.19, 130.67, 130.59, 125.59, 122.10, 119.93, 118.11, 108.46, 70.43, 58.68, 51.98, 50.87, 47.54, 34.26, 27.26, 26.05, 25.34, 24.94.

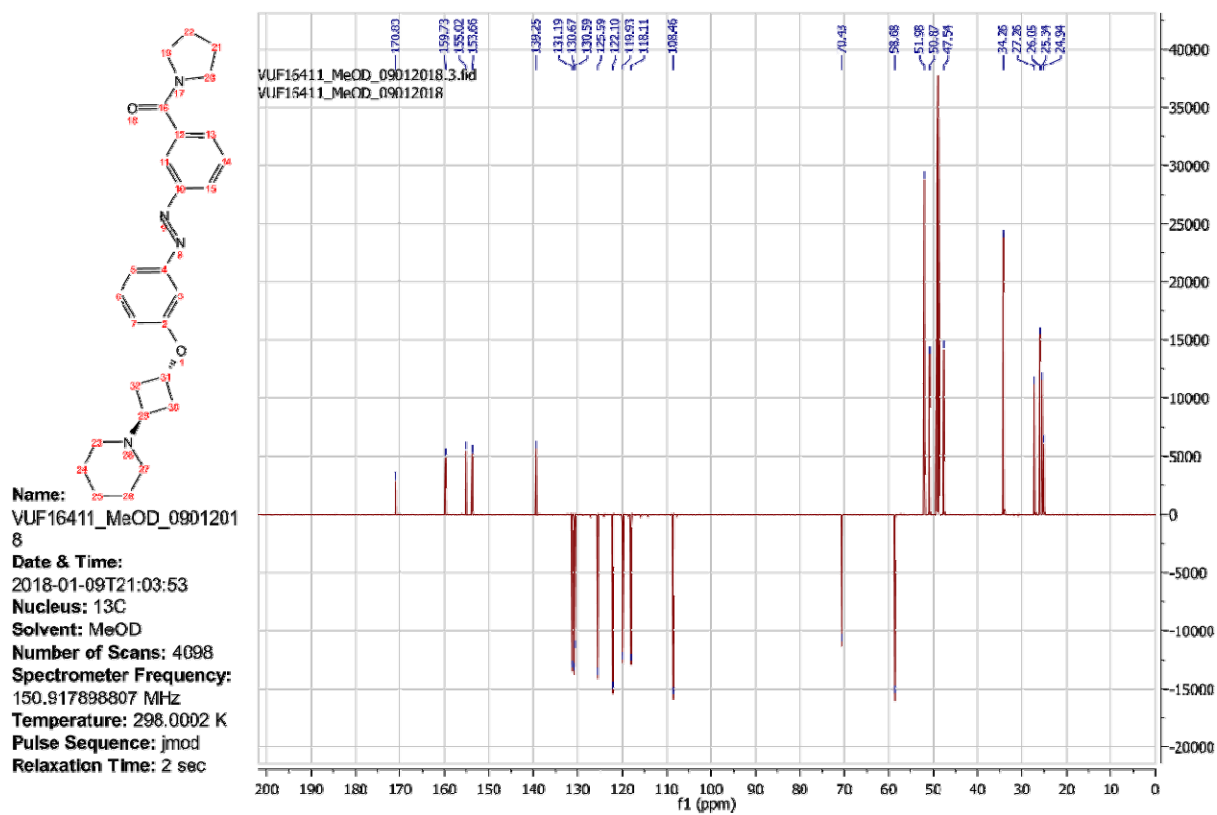

Figure S108: <sup>13</sup>C-NMR spectrum of 3-((E)-(3-((1*r*,3*s*)-3-(piperidin-1-yl)cyclobutoxy)phenyl)diazenyl)phenyl)(pyrrolidin-1-yl)methanone (34)

Acquired by : Admin  
 Date Acquired : 5/1/2018 9:55:22 AM  
 Sample Name : NIHA\_01\_302\_05012018  
 Sample ID :  
 Tray# : 1  
 Vial# : 10  
 Injection Volume : 1  
 Data File : C:\LabSolutions\Data\2018\2018-wk01\NIHA\_01\_302\_05012018.lcd  
 Background File : blanco 05012018.lcd  
 Method File : Method SCAN ACID standard azo.lcm  
 Report Format : DefaultLCMS.lcr  
 Tuning File : C:\LabSolutions\Tuning\Tuning-ESI-pos-neg01072015a.lct  
 Processed by : Admin  
 Modified Date : 15/1/2018 7:03:59 PM

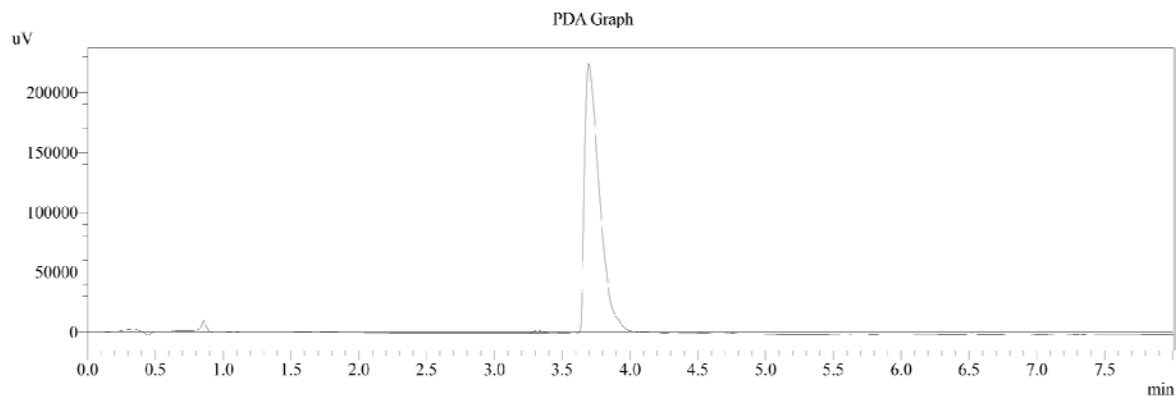

PDA Ch1 254nm 4nm

| Peak# | Name | Ret. Time | Area    | Area % |
|-------|------|-----------|---------|--------|
| 1     |      | 3.312     | 12983   | 0.747  |
| 2     |      | 3.690     | 1724018 | 99.253 |

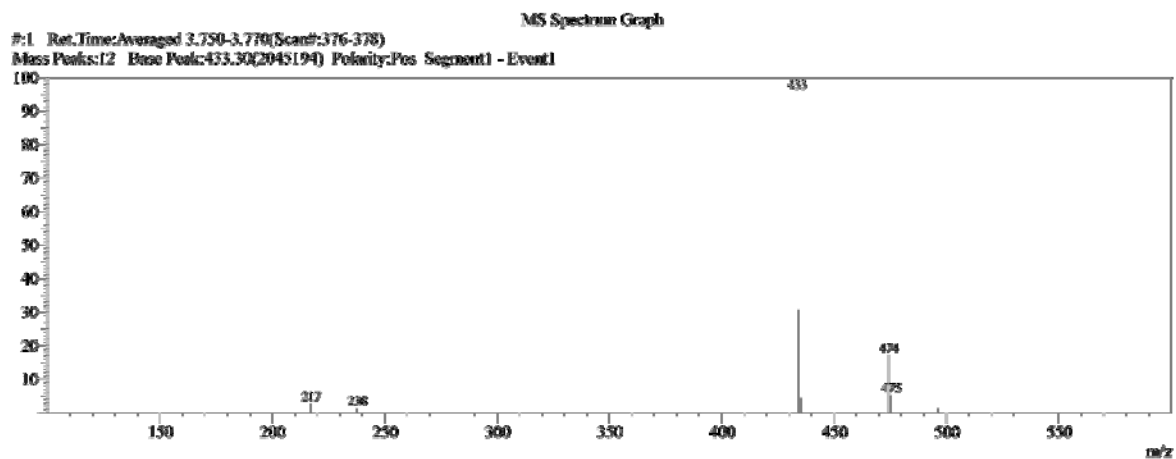

MS Spectrum Table

#1 Ret.Time:  
 BG Mode:Calc 3.590<<4.210(360<<422)  
 Mass Peaks:12 Base Peak:433.30(2045194) Polarity:Pos Segment1 - Event1

| # | m/z    | Abs.Inten. | Rel.Inten. | Charge | Polarity | Monoisotopic | #  | m/z    | Abs.Inten. | Rel.Inten. | Charge | Polarity | Monoisotopic |
|---|--------|------------|------------|--------|----------|--------------|----|--------|------------|------------|--------|----------|--------------|
| 1 | 217.10 | 54951      | 2.69       |        |          |              | 7  | 475.35 | 106749     | 5.22       |        |          |              |
| 2 | 237.70 | 27661      | 1.35       |        |          |              | 8  | 496.30 | 28026      | 1.37       |        |          |              |
| 3 | 433.30 | 2045194    | 100.00     |        |          |              | 9  | 865.60 | 42352      | 2.07       |        |          |              |
| 4 | 434.25 | 628264     | 30.72      |        |          |              | 10 | 866.70 | 22038      | 1.08       |        |          |              |
| 5 | 435.25 | 88636      | 4.33       |        |          |              | 11 | 887.70 | 54281      | 2.65       |        |          |              |
| 6 | 474.35 | 349824     | 17.10      |        |          |              | 12 | 888.75 | 25596      | 1.25       |        |          |              |

Figure S109: LC-MS chromatogram of 3-((E)-(3-((1*r*,3*s*)-3-(piperidin-1-yl)cyclobutoxy)phenyl)diazenyl)phenyl)(pyrrolidin-1-yl)methanone (34)

## References

- (1) Roche, O.; Nettekoven, M.; Vifian, W.; Sarmiento, R. M. *Bioorg. Med. Chem. Lett.* **2008**, *18*, 4377.
- (2) Wijtmans, M.; Denonne, F.; Celanire, S.; Gillard, M.; Hulscher, S.; Delaunoy, C.; Van Houtvin, N.; Bakker, R. A.; Defays, S.; Gerard, J.; Grooters, L.; Hubert, D.; Timmerman, H.; Leurs, R.; Talaga, P.; de Esch, I. J. P.; Provins, L. *MedChemComm* **2010**, *1*, 39.
